# Supplementary material for: Metal-free visible light-promoted synthesis of isothiazoles: a catalytic approach for N–S bond formation from iminyl radicals under batch and flow conditions
Source: Royal Society of Chemistry journal article supplement (doi:10.1039/d0gc02618b), 2020-01-01

## Supporting Information

### **Metal-Free Visible Light-Promoted Synthesis of Isothiazoles: a Catalytic Approach for N–S Bond Formation from Iminyl Radicals under Batch and Flow Conditions**

María Jesús Cabrera,<sup>‡a</sup> Sara Cembellín,<sup>‡\*a</sup> Adnane Halima-Salem,<sup>b</sup> Mateo Berton,<sup>a</sup>  
Leyre Marzo,<sup>a</sup> Abdellah Miloudi,<sup>b,c</sup> M. Carmen Maestro,<sup>\*a</sup> and José Alemán <sup>\*a,d</sup>

<sup>a</sup> Organic Chemistry Department, Módulo 1, Universidad Autónoma de Madrid,  
28049 Madrid, Spain. E-mail: sara.cembellin@uam.es, carmen.maestro@uam.es,  
jose.aleman@uam.es;  
Web: <http://www.uam.es/jose.aleman>

<sup>b</sup> Laboratoire de Chimie Fine, Département de Chimie, Faculté des Sciences Exactes et  
Appliquées, Université Oran-1, BP1524, El Mnaouer, 31100, Oran, Algeria.

<sup>c</sup> Département des Classes Préparatoires en Sciences et Technologies, Ecole Nationale  
Polytechnique d'Oran e Maurice-Audin, BP1523, EIMnaouer, 31100, Oran, Algeria.

<sup>d</sup> Institute for Advanced Research in Chemical Sciences (IAdChem),  
Universidad Autónoma de Madrid, 28049 Madrid, Spain

# Supporting Information

## Table of Contents

|                                                                                        |      |
|----------------------------------------------------------------------------------------|------|
| 1. General Information.....                                                            | S3   |
| 2. Synthesis and Characterization of Substrates.....                                   | S5   |
| 2.1. General Procedure and Characterization of Sulfides <b>SI-1</b> .....              | S5   |
| 2.2. General Procedure and Characterization of Selenides <b>SI-10</b> .....            | S14  |
| 2.3. General Procedure and Characterization of $\alpha$ -Imino-oxy Acids <b>1</b> .... | S15  |
| 3. Optimization of the Reaction Conditions.....                                        | S26  |
| 4. Optimization of the $\alpha$ -Imino-oxy Acid Structure.....                         | S28  |
| 5. General Procedure and Characterization of Isothiazoles <b>2</b> .....               | S29  |
| 6. Synthesis of Brassilexin Derivative <b>4</b> .....                                  | S35  |
| 7. Flow Setup for the Synthesis of Isothiazoles <b>2</b> .....                         | S37  |
| 8. Mechanistic Studies.....                                                            | S39  |
| 8.1. Cyclic Voltammetry of $\alpha$ -Imino-oxy Acids <b>1</b> .....                    | S39  |
| 8.2. Fluorescence Quenching Studies.....                                               | S42  |
| 8.3. Radical Trapping Experiments.....                                                 | S44  |
| 9. References.....                                                                     | S45  |
| 10. NMR Spectra.....                                                                   | S47  |
| 10.1. NMR Spectra of Sulfides <b>SI-1</b> .....                                        | S47  |
| 10.2. NMR Spectra of Selenides <b>SI-10</b> .....                                      | S64  |
| 10.3. NMR Spectra of $\alpha$ -Imino-oxy Acids <b>1</b> .....                          | S65  |
| 10.4. NMR Spectra of Isothiazoles <b>2</b> .....                                       | S90  |
| 10.5. NMR Spectra of Brassilexin Derivative <b>4</b> .....                             | S105 |

## 1. General Information

Reaction temperatures are reported as the ones of the heat transfer medium surrounding the vessel unless otherwise stated.

The following solvents DCM, MeCN, PhMe and THF were purified by passing through a Pure SolvTM column drying system from Innovative Technology, Inc. Additional anhydrous solvents ( $\leq 50$  ppm water) were purchased from Acros Organics, Sigma-Aldrich or Alfa Aesar and stored over molecular sieves under a nitrogen atmosphere. Commercially available chemicals were obtained from Acros Organics, Aldrich Chemical Co., Alfa Aesar, TCI Chemicals and Fluorochem, and used as received, unless otherwise stated.

Analytical thin layer chromatography (TLC) was performed on silica gel 60 F254 aluminum plates (Merck) and they were visualized by exposure to short wave ultraviolet light (254 nm, 366 nm) and/or by staining. For staining the TLC plates were dipped into a solution of  $\text{KMnO}_4$  (1 g  $\text{KMnO}_4$ , 6 g  $\text{K}_2\text{CO}_3$  and 0.1 g  $\text{KOH}$  in 100 mL  $\text{H}_2\text{O}$ ) and developed with a heat gun if necessary. Flash chromatography was performed using Geduran® Silica Gel 60 (0.040 - 0.063 nm) or Iatrobeads 6RS - 8060 silica gel with appropriate mixtures of cyclohexane and ethyl acetate and compressed air.

NMR spectra were recorded at room temperature on a Bruker AV 300 or 500 MHz spectrometer running at 300 or 500 MHz for  $^1\text{H}$ , 75 or 126 MHz for  $^{13}\text{C}$ , 282 or 471 MHz for  $^{19}\text{F}$  in solvents as indicated. Chemical shifts ( $\delta$ ) for  $^1\text{H}$ - and  $^{13}\text{C}$ -NMR spectra are given in ppm relative to tetramethylsilane (TMS) using the residual solvent signals as references for  $^1\text{H}$  and  $^{13}\text{C}$  NMR spectra ( $\text{CDCl}_3$ :  $\delta_{\text{H}} = 7.26$  ppm,  $\delta_{\text{C}} = 77.16$  ppm,  $(\text{CD}_3)_2\text{CO}$ :  $\delta_{\text{H}} = 2.05$  ppm,  $\delta_{\text{C}} = 29.84, 206.26$  ppm,  $\text{C}_6\text{D}_6$ :  $\delta_{\text{H}} = 7.16$  ppm,  $\delta_{\text{C}} = 134.19, 129.26, 128.25, 125.96$  ppm,  $\text{CD}_2\text{Cl}_2$ :  $\delta_{\text{H}} = 5.32$  ppm,  $\delta_{\text{C}} = 53.84$  ppm).<sup>[1]</sup>  $^{19}\text{F}$ -NMR spectra are not externally calibrated and chemical shifts is given relative to  $\text{CCl}_3\text{F}$  as received from the automatic data processing.  $^{13}\text{C}$ -NMR and  $^{19}\text{F}$ -NMR spectra were acquired on a broadband decoupled mode. Chemical shifts are generally reported with two ( $^1\text{H}$ ) or one (all other nuclei) digits after the decimal point. NMR-data are reported as follows: chemical shift (multiplicity [s = singlet, d = doublet,

t = triplet, q = quartet, p = quintuplet, hept = heptuplet, m = multiplet, br = broad], coupling constants ( $J$ , Hz) and integration). All spectra were processed using the MestReNova program.

High-Resolution Mass Spectra (HRMS) were recorded on an Agilent Technologies 6120 Quadrupole LC/MS coupled with an SFC Agilent Technologies 1260 Infinity Series instrument for the ESI-MS (Electrospray Ionization) or on an Agilent Technologies 5977B MSD coupled with an Agilent Technologies 7820A GC System for the EI-MS (Electron Ionization mass spectroscopy). MassWorks software version 4.0.0.0 (Cerno Bioscience) was used for the formula identification. MassWorks is an MS calibration software which calibrates isotope profiles to achieve high mass accuracy and enables elemental composition determination on conventional mass spectrometers of unit mass resolution allowing highly accurate comparisons between calibrated and theoretical spectra.<sup>[2]</sup> Obtained data are expressed in mass/charge ( $m/z$ ) units.

UV-Vis measurements were acquired on an Agilent 8453 UV-Vis Spectrophotometer controlled by UV-Visible ChemStation Software. Emission spectra were recorded on a JASCO Spectrofluorometer FP-8600 equipped with a TC-815 Peltier thermostated single cell holder (water-cooled) controlled by Spectra Manager Version 2.10.01. Time resolved emission spectra were carried out using an Edinburg Instruments FS5 Spectrofluorometer, and a 450 nm EPL laser.

Cyclic Voltammetry (CV) experiments were acquired on an IVIUM Technologies CompactStat controlled by IviumSoft version 2.124 offering a compliance voltage of up to  $\pm 100$  V (available at the counter electrode),  $\pm 10$  V scan range and  $\pm 1$  A current range. HPLC grade acetone solvent was used for all measurements. Tetra-*n*-butylammonium hexafluorophosphate was used as supporting electrolyte at 0.1 M concentration. All cyclic voltammetry experiments were performed using a conventional three-electrode system, containing a coiled Pt wire acting as counter electrode, an Ag/AgCl saturated solution as reference electrode and a glassy carbon working electrode ( $A = 0.071 \text{ cm}^2$ ) at 20 mV/s scan rate. All the electrodes were

purchased from Metrohm. Redox-active species were dissolved at 1.0 nM concentration and these solutions were throughout the measurements.

A custom-made temperature-controlled photoreactor setup was used for the photocatalytic reactions (Figure S1). The irradiation takes place at the desired wavelengths (365, 385, 420, 450 or 540 nm) using 380 mW single LEDs, located 1 cm beneath the base of the vial. Reaction temperature is kept at 20-25 °C using a recirculating chiller.

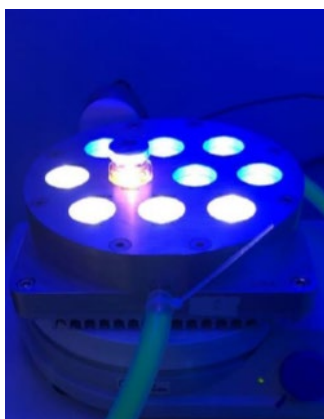

**Figure S1.** Experimental setup employed during photocatalytic reactions.

## 2. Synthesis and Characterization of Substrates

### 2.1. General Procedure and Characterization of Sulfides **SI-1**

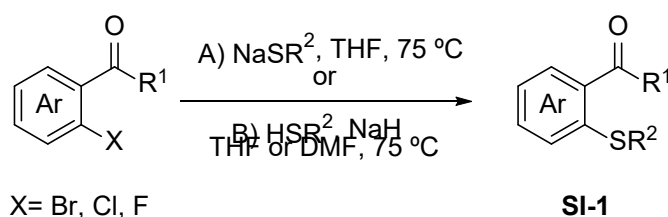

*General procedure A for the synthesis of sulfides **SI-1**:*

Compounds **SI-1a-c** were prepared following a slightly modified procedure reported in the literature.<sup>[3]</sup> 1-(2-bromophenyl)ethan-1-one (1 equiv) was added to a stirred solution of the corresponding sodium alkanethiolate (1.1. equiv) in THF (1.3M) and heated to 75 °C for 12 h. After this time, the reaction was cooled to room temperature, diluted with dichloromethane and washed with water (3x) and brine. The organic phase was dried over anhydrous MgSO<sub>4</sub> and concentrated under reduced

pressure. Then, the solid residue was subjected to flash chromatography (silica gel, cyclohexane/EtOAc) to give the analytically pure products **SI-1**.

#### *General procedure B for the synthesis of sulfides SI-1:*

Compounds **SI-1d-s** were prepared following a slightly modified procedure reported in the literature.<sup>[3]</sup> The corresponding thiol (1.05 equiv) was added dropwise over 0.25 h to a stirred suspension of NaH (1.2 equiv) in THF or DMF (2 mL/mmol of thiol) at 0 °C (icebath). Afterwards, a solution of the bromide/chloride/fluoride compound (1 equiv) in THF or DMF (0.5 mL/mmol) was added and the reaction was heated to 75 °C for 12 h. After this time, the reaction was cooled to room temperature, diluted with dichloromethane and washed with water (3x) and brine. The organic phase was dried over anhydrous MgSO<sub>4</sub> and concentrated under reduced pressure. Then, the solid residue was subjected to flash chromatography (silica gel, cyclohexane/EtOAc) to give the analytically pure products **SI-1**.

#### **1-(2-(methylthio)phenyl)ethan-1-one (SI-1a)**

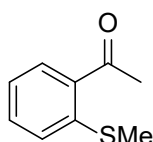

Following the general procedure A, the reaction of 1-(2-bromophenyl)ethan-1-one (2.1 mmol, 0.28 mL) and sodium methanethiolate (2.3 mmol, 160.1 mg) in THF (1.6 mL) at 75 °C afforded the product **SI-1a** (88%, 305.3 mg) as a pale orange solid. **<sup>1</sup>H NMR (300 MHz, CDCl<sub>3</sub>)** δ 7.71 (dd, *J* = 7.9, 1.3 Hz, 1H), 7.37 – 7.29 (m, 1H), 7.17 (d, *J* = 7.9 Hz, 1H), 7.04 (t, *J* = 7.5 Hz, 1H), 2.46 (s, 3H), 2.27 (s, 3H). Spectral data is in accordance with the literature.<sup>[4]</sup>

#### **1-(2-(isopropylthio)phenyl)ethan-1-one (SI-1b)**

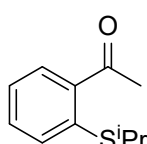

Following the general procedure A, the reaction of 1-(2-bromophenyl)ethan-1-one (2 mmol, 0.27 mL) and sodium 2-propanethiolate (2.2 mmol, 215.9 mg) in THF (1.5 mL) at 75 °C afforded the product **SI-1b** (75%, 292.3 mg) as a yellow oil. **<sup>1</sup>H NMR (300 MHz, CDCl<sub>3</sub>)** δ 7.65 (dd, *J* = 7.7, 1.0 Hz, 1H), 7.46 – 7.36 (m, 2H), 7.21 (ddd, *J* = 7.7, 6.7, 1.8 Hz, 1H), 3.46 (hept, *J* = 6.6 Hz, 1H), 2.60 (s, 3H), 1.33 (d, *J* = 6.6 Hz, 6H); **<sup>13</sup>C NMR (75 MHz, CDCl<sub>3</sub>)** δ 200.5, 138.7, 137.8, 131.3, 129.6, 129.1, 124.7, 36.2, 29.3, 22.6.

### 1-(2-(tert-butylthio)phenyl)ethan-1-one (SI-1c)

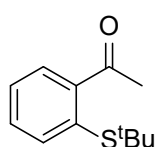

Following the general procedure A, the reaction of 1-(2-bromophenyl)ethan-1-one (2 mmol, 0.27 mL) and sodium 2-methyl-2-propanethiolate (2.2 mmol, 246.8 mg) in THF (1.5 mL) at 75 °C afforded the product **SI-1c** (68%, 284.4 mg) as a yellow oil. **<sup>1</sup>H NMR (300 MHz, CDCl<sub>3</sub>)** 7.58 (t, *J* = 8.3 Hz, 1H), 7.38 – 7.32 (m, 2H), 7.32 – 7.25 (m, 1H), 2.29 (s, 3H), 1.22 (s, 9H). Spectral data is in accordance with the literature.<sup>[5]</sup>

### 1-(2-(benzylthio)phenyl)ethan-1-one (SI-1d)

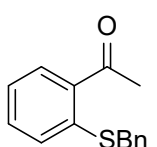

Following the general procedure B, the reaction of 1-(2-bromophenyl)ethan-1-one (2 mmol, 0.27 mL), NaH (60%, 2.4 mmol, 96 mg) and benzyl mercaptan (2.1 mmol, 0.25 mL) in THF (5.5 mL) at 75 °C afforded the product **SI-1d** (71%, 342.8 mg) as a white solid. **<sup>1</sup>H NMR (300 MHz, CDCl<sub>3</sub>)** δ 7.78 (d, *J* = 7.7 Hz, 1H), 7.40 (d, *J* = 3.6 Hz, 2H), 7.39 (d, *J* = 6.5 Hz, 2H), 7.34 – 7.17 (m, 4H), 4.13 (s, 2H), 2.59 (s, 3H). Spectral data is in accordance with the literature.<sup>[6]</sup>

### 1-(2-(phenylthio)phenyl)ethan-1-one (SI-1e)

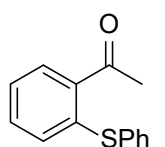

Following the general procedure B, the reaction of 1-(2-bromophenyl)ethan-1-one (2 mmol, 0.27 mL), NaH (60%, 2.4 mmol, 96 mg) and thiophenol (2.1 mmol, 0.21 mL) in THF (5.5 mL) at 75 °C afforded the product **SI-1e** (72%, 330.0 mg) as a yellow solid. **<sup>1</sup>H NMR (300 MHz, CDCl<sub>3</sub>)** δ 7.83 (dd, *J* = 7.7, 1.6 Hz, 1H), 7.56 – 7.52 (m, 2H), 7.43 – 7.40 (m, 3H), 7.28 – 7.14 (m, 2H), 6.89 (dd, *J* = 8.0, 1.2 Hz, 1H), 2.67 (s, 3H). Spectral data is in accordance with the literature.<sup>[7]</sup>

### 1-(2-(benzylthio)-4-fluorophenyl)ethan-1-one (SI-1f)

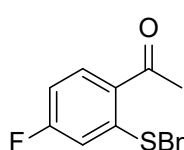

Following the general procedure B, the reaction of 1-(2-bromo-4-fluorophenyl)ethan-1-one (2.8 mmol, 600.0 mg), NaH (60%, 3.4 mmol, 134.4 mg) and benzyl mercaptan (3.0 mmol, 0.35 mL) in THF (7.7 mL) at 75 °C afforded the product **SI-1f** (64%, 463.7 mg) as a white solid. **<sup>1</sup>H NMR (300 MHz, CDCl<sub>3</sub>)** δ 7.84 (dd, *J* = 8.7, 6.0 Hz, 1H), 7.43 – 7.37 (m, 2H),

7.35 – 7.24 (m, 3H), 7.08 (dd,  $J = 10.5, 2.4$  Hz, 1H), 6.84 (ddd,  $J = 8.7, 7.6, 2.4$  Hz, 1H), 4.08 (s, 2H), 2.56 (s, 3H).  $^{13}\text{C NMR}$  (75 MHz,  $\text{CDCl}_3$ )  $\delta$  197.5, 164.8 (d,  $J = 255.0$  Hz), 145.8 (d,  $J = 8.9$  Hz), 135.5, 133.6 (d,  $J = 10.1$  Hz), 130.7 (d,  $J = 2.6$  Hz), 129.2, 128.8, 127.6, 113.0 (d = 25.1 Hz), 110.8 (d,  $J = 22.0$  Hz), 37.7, 28.1;  $^{19}\text{F NMR}$  (282 MHz,  $\text{CDCl}_3$ )  $\delta$  -105.6.

#### 1-(2-(benzylthio)-4-methoxyphenyl)ethan-1-one (SI-1g)

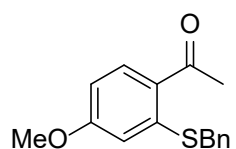

Following the general procedure B, the reaction of 1-(2-bromo-4-methoxyphenyl)ethan-1-one (2.4 mmol, 408.1 mg), NaH (60%, 2.9 mmol, 115.2 mg) and benzyl mercaptan (2.5 mmol, 0.3 mL) in DMF (6.6 mL) at 75 °C afforded the product **SI-1g** (63%, 412.9 mg) as a white solid.  $^1\text{H NMR}$  (300 MHz,  $\text{CDCl}_3$ )  $\delta$  7.71 (d,  $J = 8.7$  Hz, 1H), 7.41 – 7.34 (m, 2H), 7.29 – 7.15 (m, 3H), 6.79 (d,  $J = 2.4$  Hz, 1H), 6.57 (dd,  $J = 8.7, 2.4$  Hz, 1H), 4.02 (s, 2H), 3.68 (s, 3H), 2.45 (s, 3H);  $^{13}\text{C NMR}$  (75 MHz,  $\text{CDCl}_3$ )  $\delta$  197.1, 162.5, 144.8, 136.3, 133.7, 129.1, 128.6, 127.3, 127.1, 111.3, 108.8, 55.5, 37.3, 27.7.

#### 1-(2-(benzylthio)-5-methoxyphenyl)ethan-1-one (SI-1h)

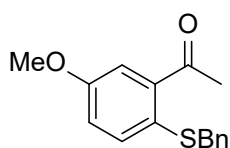

Following the general procedure B, the reaction of 1-(2-bromo-5-methoxyphenyl)ethan-1-one (2 mmol, 458.1 mg), NaH (60%, 2.4 mmol, 96 mg) and benzyl mercaptan (2.1 mmol, 0.25 mL) in THF (5.5 mL) at 75 °C afforded the product **SI-1h** (60%, 327.5 mg) as a yellow solid.  $^1\text{H NMR}$  (300 MHz,  $\text{CDCl}_3$ )  $\delta$  7.33 – 7.19 (m, 6H), 7.11 (d,  $J = 2.8$  Hz, 1H), 6.91 (dd,  $J = 8.7, 2.8$  Hz, 1H), 4.02 (s, 2H), 3.80 (s, 3H), 2.53 (s, 3H);  $^{13}\text{C NMR}$  (75 MHz,  $\text{CDCl}_3$ )  $\delta$  200.7, 157.6, 140.9, 136.9, 131.9, 128.9, 128.3, 127.2, 127.0, 117.0, 114.5, 55.3, 39.6, 29.4.

#### 1-(2-(benzylthio)-5-bromophenyl)ethan-1-one (SI-1i)

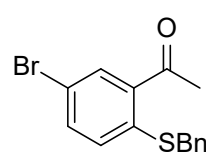

Following the general procedure B, the reaction of 1-(2-fluoro-5-bromophenyl)ethan-1-one (2 mmol, 434.1 mg), NaH (60%, 2.4 mmol, 96 mg) and benzyl mercaptan (2.1 mmol, 0.25 mL) in THF (5.5 mL) at 75 °C afforded the product **SI-1i** (57%, 367.3 mg) as a pale yellow solid.  $^1\text{H NMR}$  (300 MHz,  $\text{CDCl}_3$ )  $\delta$  7.84 (d,  $J = 2.2$  Hz, 1H), 7.48 (dd,  $J = 8.5, 2.2$  Hz,



1H), 7.34 – 7.17 (m, 6H), 4.09 (s, 2H), 2.56 (s, 3H); <sup>13</sup>C NMR (75 MHz, CDCl<sub>3</sub>) δ 198.1, 139.5, 137.1, 135.7, 134.6, 133.1, 128.9, 128.5, 128.5, 127.4, 117.6, 37.8, 28.4.

### 1-(2-(benzylthio)-5-(trifluoromethyl)phenyl)ethan-1-one (SI-1j)

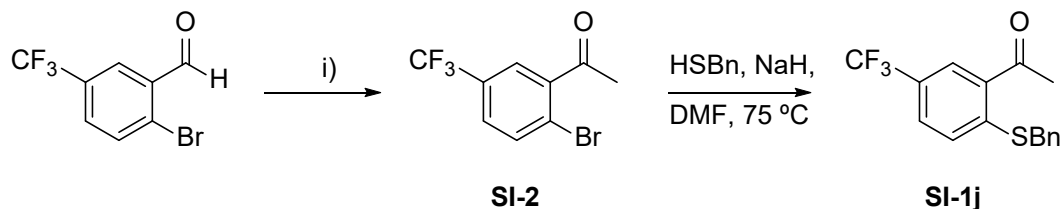

i) 1) MeMgBr, Et<sub>2</sub>O, 0 °C; 2) PCC, silica gel, DCM, rt.

Compound **SI-2** was prepared following a previously reported procedure<sup>[8]</sup> and spectral data is in accordance with the literature.<sup>[9]</sup>

Following the general procedure B, the reaction of 1-(2-bromo-5-(trifluoromethyl)ethan-1-one (**SI-2**) (1.7 mmol, 453.9 mg), NaH (60%, 2 mmol, 81.6 mg) and benzyl mercaptan (1.9 mmol, 0.22 mL) in DMF (4.7 mL) at 75 °C afforded the product **SI-1j** (43%, 224.6 mg) as a pale yellow solid. <sup>1</sup>H NMR (300 MHz, CDCl<sub>3</sub>) δ 7.98 (d, *J* = 0.8 Hz, 1H), 7.57 (dd, *J* = 8.5, 1.5 Hz, 1H), 7.46 (d, *J* = 8.5 Hz, 1H), 7.40 – 7.34 (m, 2H), 7.33 – 7.20 (m, 3H), 4.13 (s, 2H), 2.59 (s, 3H); <sup>13</sup>C NMR (75 MHz, CDCl<sub>3</sub>) δ 197.9, 146.4 (q, *J* = 1.0 Hz), 135.5, 134.6, 129.0, 128.7, 128.2 (q, *J* = 3.5 Hz), 127.6, 127.4 (q, *J* = 3.8 Hz), 126.4, 126.0 (q, *J* = 33.3 Hz), 123.8 (q, *J* = 271.8 Hz), 37.5, 28.1; <sup>19</sup>F NMR (282 MHz, CDCl<sub>3</sub>) δ -62.3.

### 1-(6-(benzylthio)benzo[d][1,3]dioxol-5-yl)ethan-1-one (SI-1k)

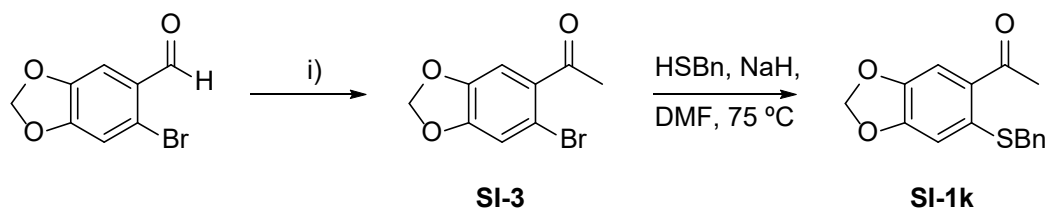

i) 1) MeMgBr, Et<sub>2</sub>O, 0 °C; 2) PCC, silica gel, DCM, rt.

Compound **SI-3** was prepared following a previously reported procedure<sup>[8]</sup> and spectral data is in accordance with the literature.<sup>[10]</sup>

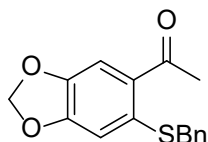

Following the general procedure B, the reaction of 1-(6-bromobenzo[d][1,3]dioxol-5-yl)ethan-1-one (**SI-3**) (1.2 mmol, 291.7 mg), NaH (60%, 1.4 mmol, 57.6 mg) and benzyl mercaptan (1.3 mmol, 0.15 mL) in DMF (3.3 mL) at 75 °C afforded the product

**SI-1k** (57%, 195.8 mg) as a pale brown solid.  $^1\text{H NMR}$  (300 MHz,  $\text{CDCl}_3$ )  $\delta$  7.40 – 7.24 (m, 5H), 7.22 (s, 1H), 6.88 (s, 1H), 6.01 (s, 2H), 4.06 (s, 2H), 2.50 (s, 3H);  $^{13}\text{C NMR}$  (75 MHz,  $\text{CDCl}_3$ )  $\delta$  197.6, 151.1, 145.1, 136.3, 129.2, 128.7, 127.4, 110.2, 107.4, 102.2, 38.6, 28.6.

### 1-(3-(benzyloxy)-2-(benzylthio)phenyl)ethan-1-one (**SI-1l**)

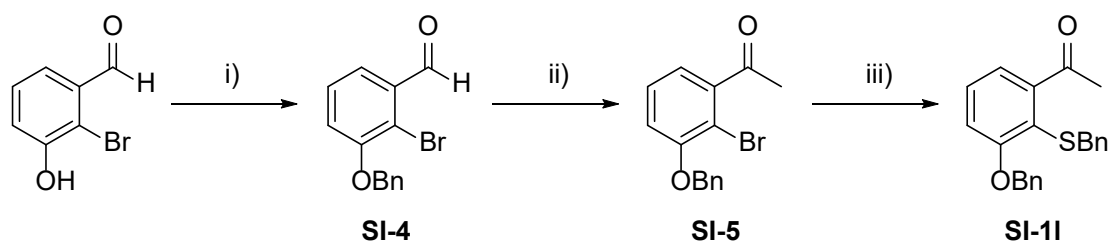

i)  $\text{K}_2\text{CO}_3$ , BnBr, DMF, rt; ii) 1) MeMgBr,  $\text{Et}_2\text{O}$ , 0 °C; 2) PCC, silica gel, DCM, rt; iii) HSBn, NaH, DMF, 75 °C.

Compounds **SI-4** and **SI-5** were prepared following previously reported procedures<sup>[8,11]</sup> and spectral data is in accordance with the literature.<sup>[12]</sup>

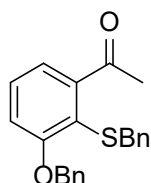

Following the general procedure B, the reaction of 1-(3-(benzyloxy)-2-bromophenyl)ethan-1-one (**SI-5**) (0.7 mmol, 213.6 mg), NaH (60%, 0.84 mmol, 33.6 mg) and benzyl mercaptan (0.74 mmol, 0.09 mL) in DMF (1.9 mL) at 75 °C afforded the product **SI-1l** (61%,

150.0 mg) as a yellow solid.  $^1\text{H NMR}$  (300 MHz,  $\text{CDCl}_3$ )  $\delta$  7.45 – 7.39 (m, 2H), 7.37 – 7.25 (m, 3H), 7.22 – 7.15 (m, 1H), 7.12 – 7.03 (m, 3H), 7.00 – 6.94 (m, 2H), 6.91 (dd,  $J$  = 8.2, 0.7 Hz, 1H), 6.74 (dd,  $J$  = 7.6, 0.7 Hz, 1H), 5.08 (s, 2H), 3.95 (s, 2H), 2.20 (s, 3H);  $^{13}\text{C NMR}$  (75 MHz,  $\text{CDCl}_3$ )  $\delta$  203.9, 159.7, 149.1, 138.1, 136.6, 130.0, 129.0, 128.8, 128.4, 128.2, 127.4, 127.1, 118.8, 118.6, 113.8, 71.1, 39.3, 31.3.

### 1-(1-(benzylthio)naphthalen-2-yl)ethan-1-one (SI-1m)

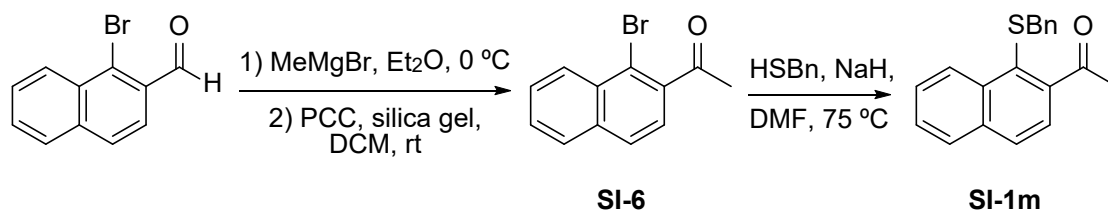

Compound **SI-6** was prepared following a previously reported procedure<sup>[8]</sup> and spectral data is in accordance with the literature.<sup>[13]</sup>

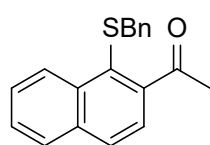

Following the general procedure B, the reaction of 1-(1-bromonaphthalen-2-yl)ethan-1-one (**SI-6**) (2 mmol, 498.2 mg), NaH (60%, 2.4 mmol, 96 mg) and benzyl mercaptan (2.1 mmol, 0.25 mL) in DMF (5.5 mL) at 75 °C afforded the product **SI-1m** (62%, 364.3 mg) as a pale yellow solid. <sup>1</sup>H NMR (300 MHz, CDCl<sub>3</sub>) δ 8.60 (d, *J* = 8.0 Hz, 1H), 8.07 – 7.77 (m, 2H), 7.56 (pd, *J* = 6.9, 1.1 Hz, 2H), 7.31 (d, *J* = 8.4 Hz, 1H), 7.22 – 7.03 (m, 3H), 7.09 – 6.88 (m, 2H), 3.96 (s, 2H), 2.49 (s, 3H); <sup>13</sup>C NMR (75 MHz, CDCl<sub>3</sub>) δ 204.6, 146.9, 137.4, 134.7, 134.1, 129.9, 128.8, 128.5, 128.3, 127.6, 127.4, 127.2, 127.0, 126.4, 122.7, 42.2, 31.6.

### 1-(3-(benzylthio)furan-2-yl)ethan-1-one (SI-1n)

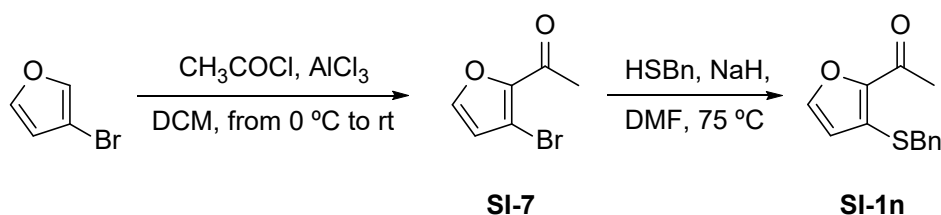

Compound **SI-7** was prepared following a previously reported procedure and spectral data is in accordance with the literature.<sup>[14]</sup>

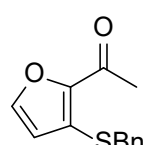

Following the general procedure B, the reaction of 1-(3-bromofuran-2-yl)ethan-1-one (**SI-7**) (3.45 mmol, 652.1 mg), NaH (60%, 4.1 mmol, 166 mg) and benzyl mercaptan (3.6 mmol, 0.47 mL) in DMF (9.5 mL) at 75 °C afforded the product **SI-1n** (87%, 696.9 mg) as a yellow solid. <sup>1</sup>H NMR (300 MHz, CDCl<sub>3</sub>) δ 7.33 (d, *J* = 1.9 Hz, 1H), 7.33 – 7.08 (m, 5H), 6.41 (d, *J* = 1.9 Hz, 1H), 4.06 (s, 2H), 2.35 (s, 3H); <sup>13</sup>C NMR (75 MHz, CDCl<sub>3</sub>) δ 186.7, 146.8,

145.2, 136.1, 130.9, 128.7, 128.6, 127.4, 111.8, 37.1, 26.1.

### 1-(3-(benzylthio)thiophen-2-yl)ethan-1-one (SI-1o)

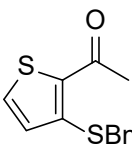 Following the general procedure B, the reaction of 1-(3-bromothiophen-2-yl)ethan-1-one (2 mmol, 408.1 mg), NaH (60%, 2.4 mmol, 96 mg) and benzyl mercaptan (2.1 mmol, 0.25 mL) in DMF (5.5 mL) at 75 °C afforded the product **SI-1o** (83%, 412.9 mg) as a white solid. **<sup>1</sup>H NMR (300 MHz, CDCl<sub>3</sub>)** δ 7.44 (d, *J* = 5.2 Hz, 1H), 7.39 – 7.32 (m, 2H), 7.32 – 7.20 (m, 3H), 7.03 (d, *J* = 5.2 Hz, 1H), 4.19 (s, 2H), 2.47 (s, 3H); **<sup>13</sup>C NMR (75 MHz, CDCl<sub>3</sub>)** δ 189.8, 143.7, 136.2, 132.1, 131.4, 128.9, 128.7, 127.6, 127.3, 38.1, 28.8.

### 1-(2-(benzylthio)pyridin-3-yl)ethan-1-one (SI-1p)

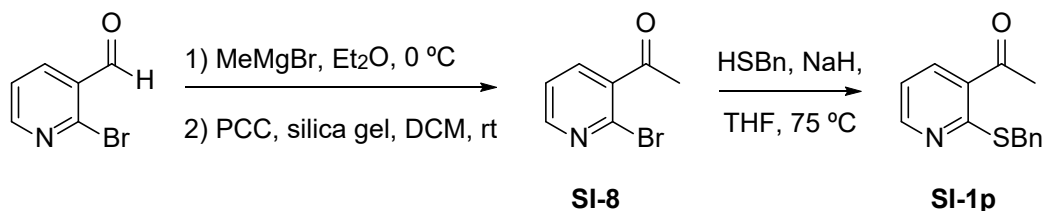

Compound **SI-8** was prepared following a previously reported procedure<sup>[8]</sup> and spectral data is in accordance with the literature.<sup>[15]</sup>

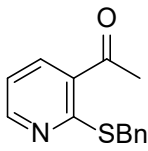 Following the general procedure B, the reaction of 1-(2-bromopyridin-3-yl)ethan-1-one (1 mmol, 110.4 mg), NaH (60%, 1.2 mmol, 48 mg) and benzyl mercaptan (1.05 mmol, 0.13 mL) in THF (2.8 mL) at 75 °C afforded the product **SI-1p** (45%, 108.7 mg) as a pale yellow solid. **<sup>1</sup>H NMR (300 MHz, CDCl<sub>3</sub>)** δ 8.58 (dd, *J* = 4.7, 1.8 Hz, 1H), 8.04 (dd, *J* = 7.8, 1.8 Hz, 1H), 7.46 – 7.40 (m, 2H), 7.32 – 7.17 (m, 3H), 7.09 (dd, *J* = 7.8, 4.7 Hz, 1H), 4.44 (s, 2H), 2.57 (s, 3H); **<sup>13</sup>C NMR (75 MHz, CDCl<sub>3</sub>)** δ 197.6, 161.4, 151.7, 138.4, 138.0, 129.5, 129.0, 128.4, 126.9, 118.3, 34.9, 27.7.

### 1-(2-(benzylthio)quinolin-3-yl)ethan-1-one (SI-1q)

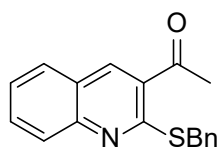

Following the general procedure B, the reaction of 1-(2-chloroquinolin-3-yl)ethan-1-one (0.8 mmol, 187.5 mg), NaH (60%, 1 mmol, 38.4 mg) and benzyl mercaptan (0.84 mmol, 0.10 mL) in DMF (2.2 mL) at 75 °C afforded the product **SI-1q** (96%, 225.8 mg) as a pale yellow solid. **<sup>1</sup>H NMR (300 MHz, CDCl<sub>3</sub>)** δ 8.40 (s, 1H), 7.97 (d, *J* = 8.3 Hz, 1H), 7.79 – 7.70 (m, 2H), 7.53 (d, *J* = 7.1 Hz, 2H), 7.44 (t, *J* = 7.4 Hz, 1H), 7.29 (t, *J* = 7.4 Hz, 2H), 7.25 – 7.17 (m, 1H), 4.56 (s, 2H), 2.64 (s, 3H); **<sup>13</sup>C NMR (75 MHz, CDCl<sub>3</sub>)** δ 197.5, 158.7, 148.4, 139.6, 138.4, 132.4, 129.5, 128.8, 128.3, 127.9, 127.7, 126.8, 125.9, 124.0, 35.0, 27.7.

### 2-(benzylthio)benzaldehyde (SI-1r)

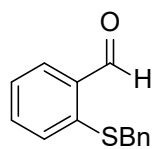

Following the general procedure B, the reaction of 2-bromobenzaldehyde (2 mmol, 370.0 mg), NaH (60%, 2.4 mmol, 96 mg) and benzyl mercaptan (2.1 mmol, 0.25 mL) in THF (5.5 mL) at 75 °C afforded the product **SI-1r** (75%, 341.1 mg) as a white solid. **<sup>1</sup>H NMR (300 MHz, CDCl<sub>3</sub>)** δ 10.25 (s, 1H), 7.79 (d, *J* = 7.4 Hz, 1H), 7.44 (dt, *J* = 7.4, 3.8 Hz, 2H), 7.33 – 7.17 (m, 6H), 4.11 (s, 2H). Spectral data is in accordance with the literature.<sup>[16]</sup>

### (2-(benzylthio)phenyl)(phenyl)methanone (SI-1s)

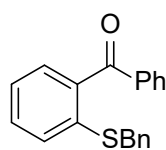

Following the general procedure B, the reaction of (2-bromophenyl)(phenyl)methanone (2 mmol, 522.2 mg), NaH (60%, 2.4 mmol, 96 mg) and benzyl mercaptan (2.1 mmol, 0.25 mL) in THF (5.5 mL) at 75 °C afforded the product **SI-1s** (63%, 385.4 mg) as a pale yellow solid. **<sup>1</sup>H NMR (300 MHz, CDCl<sub>3</sub>)** δ 7.62 (d, *J* = 8.3 Hz, 2H), 7.42 (t, *J* = 7.4 Hz, 1H), 7.28 (t, *J* = 7.7 Hz, 3H), 7.21 (d, *J* = 8.3 Hz, 2H), 7.15 – 7.06 (m, 6H), 3.91 (s, 2H); **<sup>13</sup>C NMR (75 MHz, CDCl<sub>3</sub>)** δ 196.6, 140.7, 137.3, 136.8, 135.3, 133.0, 131.1, 130.3, 130.0, 128.8, 128.7, 128.3, 127.0, 125.9, 39.6.



chromatography (silica gel, cyclohexane/EtOAc) to give the analytically pure products **SI-10a** or **SI-10b**.

### 1-(2-(benzylselanyl)phenyl)ethan-1-one (**SI-10a**)

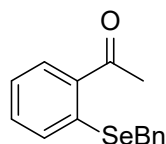

Following the general procedure, the reaction of 1-(2-selenocyanatophenyl)ethan-1-one (**SI-9a**) (2 mmol, 448.2 mg), NaBH<sub>4</sub> (2.2 mmol, 83.2 mg) and benzyl bromide (8.8 mmol, 1.05 mL) in MeOH (10 mL) at 0 °C afforded the product **SI-10a** (71%, 411.7 mg) as a pale brown solid. <sup>1</sup>H NMR (300 MHz, CDCl<sub>3</sub>) δ 7.93 (dd, *J* = 7.8, 1.4 Hz, 1H), 7.58 (d, *J* = 7.8 Hz, 1H), 7.42 (dd, *J* = 11.9, 7.2 Hz, 3H), 7.35 – 7.20 (m, 4H), 4.11 (s, 2H), 2.62 (s, 3H). Spectral data is in accordance with the literature.<sup>[17]</sup>

### 2-(benzylselanyl)-5-chlorobenzaldehyde (**SI-10b**)

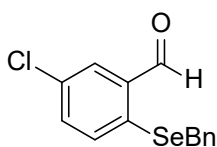

Following the general procedure, the reaction of 5-chloro-2-selenocyanatobenzaldehyde (**SI-9b**) (2 mmol, 489.0 mg), NaBH<sub>4</sub> (2.2 mmol, 83.2 mg) and benzyl bromide (8.8 mmol, 1.05 mL) in MeOH (10 mL) at 0 °C afforded the product **SI-10b** (76%, 469.3 mg) as a yellow oil. <sup>1</sup>H NMR (300 MHz, CDCl<sub>3</sub>) δ 10.05 (s, 1H), 7.79 (d, *J* = 2.4 Hz, 1H), 7.52 (d, *J* = 8.4 Hz, 1H), 7.43 (dd, *J* = 8.4, 2.4 Hz, 1H), 7.26 – 7.20 (m, 5H), 4.10 (s, 2H); <sup>13</sup>C NMR (75 MHz, CDCl<sub>3</sub>) δ 191.5, 136.6, 134.5, 133.8, 133.7, 133.1, 132.3, 129.7, 129.0, 128.7, 127.3, 31.5.

## 2.3. General Procedure and Characterization of α-Imino-oxy

### Acids 1

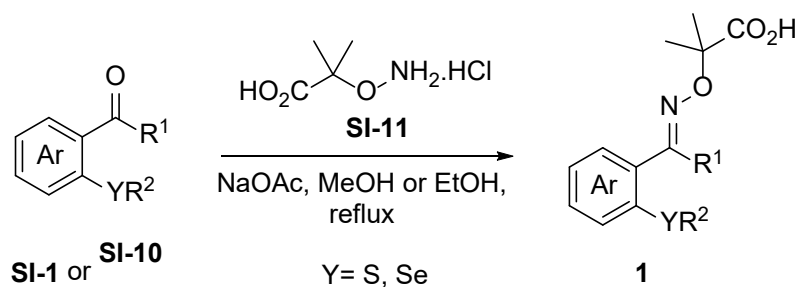

Compound **SI-11** was prepared following a reported procedure in the literature and spectral data is in accordance with the literature.<sup>[18]</sup>

### General procedure for the synthesis of oximes 1:

Compounds **1a-u** were prepared following a slightly modified procedure reported in the literature.<sup>[18]</sup> A solution of ketone (1.0 equiv) in MeOH or EtOH (0.2M) was treated with 2-(aminoxy)-2-methylpropanoic acid hydrochloride (**SI-11**) (1.2 equiv) and sodium acetate (2.4 equiv) and heated to reflux until completion by TLC analysis. The mixture was then allowed to cool to room temperature and water was added. The resulting aqueous solution was extracted with EtOAc (3x) and the combined organic layers were dried over MgSO<sub>4</sub>, filtered and concentrated under vacuum to provide the product. Then, the residue was subjected to flash chromatography (silica gel, cyclohexane/EtOAc) to give the analytically pure products **1**.

#### 2-methyl-2-(((1-(2-(methylthio)phenyl)ethylidene)amino)oxy)propanoic acid (**1a**)

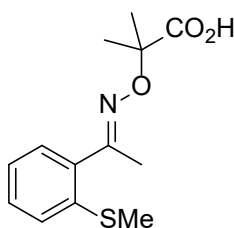

Following the general procedure, the reaction of **SI-1a** (0.9 mmol, 149.6 mg), **SI-11** (1.08 mmol, 168.0 mg) and sodium acetate (2.2 mmol, 177.2 mg) in EtOH (4.5 mL) at reflux afforded the product **1a** (57%, 137.3 mg) as a white solid. <sup>1</sup>H NMR (300 MHz, CDCl<sub>3</sub>) δ 10.02 (bs, 1H), 7.35 – 7.22 (m, 3H), 7.18 – 7.11 (m, 1H), 2.38 (s, 3H), 2.28 (s, 3H), 1.62 (s, 6H); <sup>13</sup>C NMR (75 MHz, CDCl<sub>3</sub>) δ 179.5, 157.5, 137.7, 136.5, 129.1, 128.8, 126.8, 124.9, 81.3, 24.4, 16.8, 16.0; HRMS m/z (ESI): calcd. for C<sub>13</sub>H<sub>16</sub>NO<sub>3</sub>S (M-H)<sup>-</sup> 266.0856, found 266.0862.

#### 2-(((1-(2-(isopropylthio)phenyl)ethylidene)amino)oxy)-2-methylpropanoic acid (**1b**)

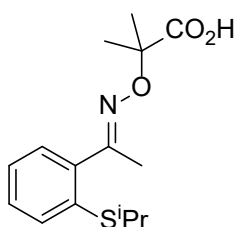

Following the general procedure, the reaction of **SI-1b** (1 mmol, 194.0 mg), **SI-11** (1.2 mmol, 186.7 mg) and sodium acetate (2.4 mmol, 196.9 mg) in EtOH (5 mL) at reflux afforded the product **1b** (75%, 22.7 mg) as a yellow oil. <sup>1</sup>H NMR (300 MHz, CDCl<sub>3</sub>) δ 8.20 (bs, 1H), 7.44 (d, *J* = 7.7 Hz, 1H), 7.35 – 7.25 (m, 1H), 7.22 (d, *J* = 4.1 Hz, 2H), 3.40 – 3.21 (m, 1H), 2.28 (s, 3H), 1.59 (s, 6H), 1.22 (d, *J* = 6.6 Hz, 6H); <sup>13</sup>C NMR (75 MHz, CDCl<sub>3</sub>) δ 177.0, 160.0, 139.8, 134.5, 132.7, 129.2, 129.1, 126.8, 81.7, 38.7, 24.5, 23.0, 17.3.; HRMS m/z (ESI): calcd. for C<sub>15</sub>H<sub>20</sub>NO<sub>3</sub>S



(M-H)<sup>-</sup> 294.1169, found 249.1165.

**2-(((1-(2-(tert-butylthio)phenyl)ethylidene)amino)oxy)-2-methylpropanoic acid (1c)**

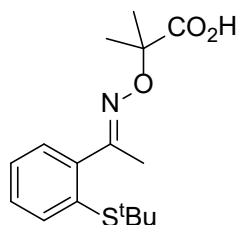

Following the general procedure, the reaction of **SI-1c** (0.3 mmol, 66.0 mg), **SI-11** (0.36 mmol, 56.0 mg) and sodium acetate (0.72 mmol, 59.1 mg) in EtOH (1.5 mL) at reflux afforded the product **1c** (60%, 55.9 mg) as a pale yellow solid.

**<sup>1</sup>H NMR (300 MHz, CDCl<sub>3</sub>)** δ 7.63 – 7.54 (m, 1H), 7.38 – 7.32 (m, 2H), 7.31 – 7.25 (m, 1H), 2.29 (s, 3H), 1.58 (s, 6H), 1.22 (s, 9H); **<sup>13</sup>C NMR (75 MHz, CDCl<sub>3</sub>)** δ 178.0, 160.8, 144.3, 139.4, 131.4, 129.7, 129.2, 128.9, 81.5, 47.9, 31.3, 24.6, 18.8; **HRMS** m/z (ESI): calcd. for C<sub>16</sub>H<sub>22</sub>NO<sub>3</sub>S (M-H)<sup>-</sup> 308.1326, found 308.1336.

**2-(((1-(2-(benzylthio)phenyl)ethylidene)amino)oxy)-2-methylpropanoic acid (1d)**

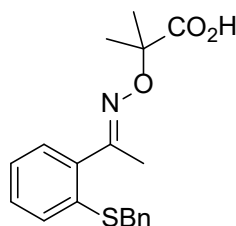

Following the general procedure, the reaction of **SI-1d** (0.4 mmol, 100.2 mg), **SI-11** (0.48 mmol, 74.7 mg) and sodium acetate (0.96 mmol, 78.7 mg) in EtOH (2 mL) at reflux afforded the product **1d** (96%, 132.8 mg) as a white solid. **<sup>1</sup>H NMR (300 MHz, CDCl<sub>3</sub>)** δ 10.91 (bs, 1H), 7.38 – 7.34 (m, 1H), 7.31 – 7.24

(m, 8H), 4.09 (s, 2H), 2.29 (s, 3H), 1.65 (s, 6H); **<sup>13</sup>C NMR (75 MHz, CDCl<sub>3</sub>)** δ 179.4, 158.3, 139.1, 137.4, 134.9, 131.1, 129.1, 129.0, 128.9, 128.4, 127.1, 126.5, 81.3, 39.5, 24.4, 16.7; **HRMS** m/z (ESI): calcd. for C<sub>19</sub>H<sub>20</sub>NO<sub>3</sub>S (M-H)<sup>-</sup> 342.1169, found 342.1162.

**2-methyl-2-(((1-(2-(phenylthio)phenyl)ethylidene)amino)oxy)propanoic acid (1e)**

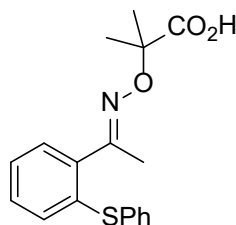

Following the general procedure, the reaction of **SI-1e** (1 mmol, 228.3 mg), **SI-11** (1.2 mmol, 186.7 mg) and sodium acetate (2.4 mmol, 196.9 mg) in EtOH (5 mL) at reflux afforded the product

**1e** (34%, 111.0 mg) as a white solid. **<sup>1</sup>H NMR (300 MHz, CDCl<sub>3</sub>)** δ 10.32 (bs, 1H), 7.39 – 7.24 (m, 9H), 2.36 (s, 3H), 1.61 (s, 6H); **<sup>13</sup>C NMR (75 MHz, CDCl<sub>3</sub>)** δ 177.3, 157.1, 137.3, 134.7, 134.1, 131.2, 130.5, 128.3, 128.2, 128.2, 126.2, 125.9, 80.5, 23.3, 15.4; **HRMS** m/z (ESI): calcd. for C<sub>18</sub>H<sub>18</sub>NO<sub>3</sub>S (M-H)<sup>-</sup> 328.1013,

found 328.1017.

**2-(((1-(2-(benzylthio)-4-fluorophenyl)ethylidene)amino)oxy)-2-methylpropanoic acid (1f)**

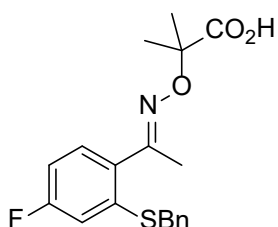

Following the general procedure, the reaction of **SI-1f** (0.4 mmol, 99.2 mg), **SI-11** (0.48 mmol, 74.7 mg) and sodium acetate (0.96 mmol, 78.7 mg) in EtOH (2 mL) at reflux afforded the product **1f** (88%, 126.9 mg) as a white solid. **<sup>1</sup>H NMR (300 MHz, CDCl<sub>3</sub>)** δ 9.99 (bs, 1H), 7.27 – 7.16 (m, 6H), 6.99 (dd, *J* = 9.5, 2.5 Hz, 1H), 6.83 (td, *J* = 8.3, 2.5 Hz, 1H), 4.03 (s, 2H), 2.20 (s, 3H), 1.57 (s, 6H); **<sup>13</sup>C NMR (75 MHz, CDCl<sub>3</sub>)** δ 179.0, 162.7 (d, *J* = 250.1 Hz), 157.3, 138.3 (d, *J* = 8.1 Hz), 136.6, 134.1 (d, *J* = 3.3 Hz), 130.7 (d, *J* = 8.8 Hz), 128.9, 128.7, 127.5, 116.5 (d, *J* = 23.7 Hz), 113.0 (d, *J* = 21.6 Hz), 81.5, 39.1, 24.4, 16.5; **<sup>19</sup>F NMR (282 MHz, CDCl<sub>3</sub>)** δ -111.98 (syn isomer), -112.59 (anti isomer); **HRMS** *m/z* (ESI): calcd. for C<sub>19</sub>H<sub>19</sub>FNO<sub>3</sub>S (M-H)<sup>-</sup> 360.1064, found 360.1050.

**2-(((1-(2-(benzylthio)-4-methoxyphenyl)ethylidene)amino)oxy)-2-methylpropanoic acid (1g)**

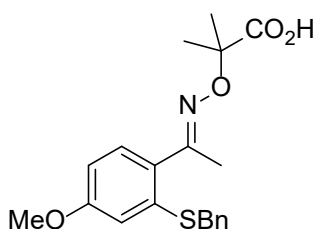

Following the general procedure, the reaction of **SI-1g** (0.5 mmol, 149.6 mg), **SI-11** (0.6 mmol, 93.3 mg) and sodium acetate (1.2 mmol, 98.4 mg) in EtOH (2.5 mL) at reflux afforded the product **1g** (70%, 143.0 mg) as a white solid. **<sup>1</sup>H NMR (300 MHz, CDCl<sub>3</sub>)** δ 9.89 (bs, 1H), 7.30 – 7.20 (m, 5H), 7.17 (d, *J* = 8.5 Hz, 1H), 6.82 (d, *J* = 2.5 Hz, 1H), 6.71 (dd, *J* = 8.5, 2.5 Hz, 1H), 4.04 (s, 2H), 3.71 (s, 3H), 2.23 (s, 3H), 1.59 (s, 6H); **<sup>13</sup>C NMR (75 MHz, CDCl<sub>3</sub>)** δ 178.6, 159.9, 158.3, 137.2, 136.8, 130.8, 130.2, 129.0, 128.6, 127.3, 115.8, 111.9, 81.4, 55.4, 39.3, 24.5, 16.8; **HRMS** *m/z* (ESI): calcd. for C<sub>20</sub>H<sub>22</sub>NO<sub>4</sub>S (M-H)<sup>-</sup> 372.1264, found 372.1264.

**2-(((1-(2-(benzylthio)-5-methoxyphenyl)ethylidene)amino)oxy)-2-methylpropanoic acid (1h)**

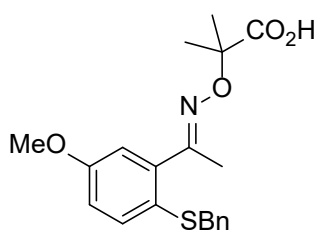

Following the general procedure, the reaction of **SI-1h** (1 mmol, 272.2 mg), **SI-11** (1.2 mmol, 186.7 mg) and sodium acetate (2.4 mmol, 196.9 mg) in EtOH (5 mL) at reflux afforded the product **1h** (71%, 266.5 mg) as a white solid.

**<sup>1</sup>H NMR (300 MHz, CDCl<sub>3</sub>)** δ 7.33 – 7.05 (m, 6H), 6.88 – 6.59 (m, 2H), 3.91 (s, 2H), 3.78 (s, 3H), 2.20 (s, 3H), 1.58 (s, 6H); **<sup>13</sup>C NMR (75 MHz, CDCl<sub>3</sub>)** δ 178.1, 159.2, 159.1, 142.2, 137.8, 135.8, 128.9, 128.9, 128.3, 126.9, 124.2, 114.7, 81.4, 55.4, 41.2, 24.3, 17.1; **HRMS** m/z (ESI): calcd. for C<sub>20</sub>H<sub>22</sub>NO<sub>4</sub>S (M-H)<sup>-</sup> 372.1264, found 372.1259.

**2-(((1-(2-(benzylthio)-5-bromophenyl)ethylidene)amino)oxy)-2-methylpropanoic acid (1i)**

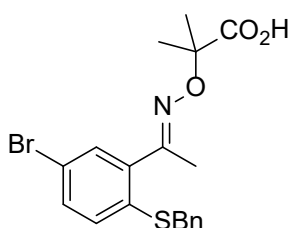

Following the general procedure, the reaction of **SI-1i** (1 mmol, 320.0 mg), **SI-11** (1.2 mmol, 186.7 mg) and sodium acetate (2.4 mmol, 196.9 mg) in EtOH (5 mL) at reflux afforded the product **1i** (74%, 313.8 mg) as a brown oil. **<sup>1</sup>H**

**NMR (300 MHz, CDCl<sub>3</sub>)** δ 7.35 – 7.30 (m, 2H), 7.26 – 7.17 (m, 5H), 7.12 (d, *J* = 9.0 Hz, 1H), 3.99 (s, 2H), 2.19 (s, 3H), 1.57 (s, 6H); **<sup>13</sup>C NMR (75 MHz, CDCl<sub>3</sub>)** δ 178.3, 157.1, 140.6, 136.9, 134.1, 132.5, 131.9, 131.8, 128.8, 128.5, 127.2, 120.2, 81.5, 39.4, 24.3, 16.4; **HRMS** m/z (ESI): calcd. for C<sub>19</sub>H<sub>19</sub>BrNO<sub>3</sub>S (M-H)<sup>-</sup> 420.0264, found 420.0277.

**2-(((1-(2-(benzylthio)-5-(trifluoromethyl)phenyl)ethylidene)amino)oxy)-2-methylpropanoic acid (1j)**

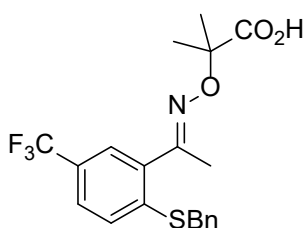

Following the general procedure, the reaction of **SI-1j** (0.6 mmol, 179.8 mg), **SI-11** (0.7 mmol, 112.0 mg) and sodium acetate (1.4 mmol, 118.1 mg) in EtOH (3 mL) at reflux afforded the product **1j** (89%, 211.8 mg) as a white solid.

**<sup>1</sup>H NMR (300 MHz, CDCl<sub>3</sub>)** δ 10.12 (bs, 1H), 7.49 – 7.43

(m, 2H), 7.40 – 7.34 (m, 1H), 7.31 – 7.24 (m, 5H), 4.10 (s, 2H), 2.26 (s, 3H), 1.61 (s, 6H); <sup>13</sup>C NMR (75 MHz, CDCl<sub>3</sub>) δ 179.4, 156.3, 141.1 (q, J = 1.2 Hz), 137.8, 136.3, 128.8, 128.7, 128.6, 127.7 (q, J = 32.8 Hz), 127.4, 125.6 (q, J = 3.5 Hz), 125.4 (q, J = 3.6 Hz), 123.9 (q, J = 271.9 Hz), 81.6, 38.5, 24.3, 16.0; <sup>9</sup>F NMR (282 MHz, CDCl<sub>3</sub>) δ -62.43 (syn isomer), -62.48 (anti isomer); HRMS m/z (ESI): calcd. for C<sub>20</sub>H<sub>19</sub>F<sub>3</sub>NO<sub>3</sub>S (M-H)<sup>-</sup> 410.1032, found 410.1026.

**2-(((1-(6-(benzylthio)benzo[d][1,3]dioxol-5-yl)ethylidene)amino)oxy)-2-methylpropanoic acid (1k)**

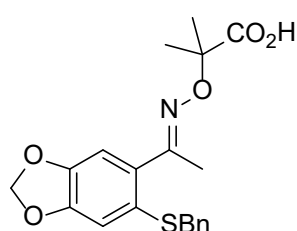

Following the general procedure, the reaction of **SI-1k** (0.1 mmol, 37.5 mg), **SI-11** (0.12 mmol, 18.7 mg) and sodium acetate (0.24 mmol, 19.7 mg) in EtOH (0.5 mL) at reflux afforded the product **1k** (81%, 41.0 mg) as a white solid. <sup>1</sup>H

NMR (300 MHz, CDCl<sub>3</sub>) δ 7.26 – 7.13 (m, 5H), 6.79 (s, 1H), 6.68 (s, 1H), 5.94 (s, 2H), 3.93 (s, 2H), 2.15 (s, 3H), 1.56 (s, 6H); <sup>13</sup>C NMR (75 MHz, CDCl<sub>3</sub>) δ 178.0, 158.9, 148.1, 147.2, 137.5, 134.6, 128.8, 128.4, 127.1, 126.6, 113.4, 109.2, 101.7, 81.4, 41.1, 24.4, 17.2; HRMS m/z (ESI): calcd. for C<sub>20</sub>H<sub>20</sub>NO<sub>5</sub>S (M-H)<sup>-</sup> 386.1057, found 386.1096.

**2-(((1-(3-(benzyloxy)-2-(benzylthio)phenyl)ethylidene)amino)oxy)-2-methylpropanoic acid (1l)**

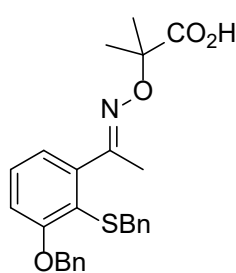

Following the general procedure, the reaction of **SI-1l** (0.3 mmol, 99.9 mg), **SI-11** (0.36 mmol, 56.0 mg) and sodium acetate (0.72 mmol, 59.1 mg) in EtOH (1.5 mL) at reflux afforded the product **1l** (59%, 75.6 mg) as a white solid. <sup>1</sup>H

NMR (300 MHz, CDCl<sub>3</sub>) δ 8.63 (bs, 1H), 7.58 – 7.51 (m, 2H), 7.48 – 7.38 (m, 3H), 7.32 – 7.24 (m, 1H), 7.22 – 7.15 (m, 3H), 7.11 – 7.06 (m, 2H), 7.00 (dd, J = 8.3, 0.9 Hz, 1H), 6.84 (dd, J = 7.6, 1.0 Hz, 1H), 5.18 (s, 2H), 4.06 (s, 2H), 2.07 (s, 3H), 1.60 (s, 6H); <sup>13</sup>C NMR (75 MHz, CDCl<sub>3</sub>) δ 177.7, 160.2, 159.8, 143.9, 138.3, 136.7, 129.6, 129.0, 128.8, 128.4, 128.3, 128.2, 127.4, 127.0, 121.6, 113.2, 81.5, 71.1, 39.1, 24.5, 17.6; HRMS m/z (ESI): calcd. for C<sub>26</sub>H<sub>26</sub>NO<sub>4</sub>S (M-H)<sup>-</sup> 448.1577, found 448.1596.

**2-(((1-(1-(benzylthio)naphthalen-2-yl)ethylidene)amino)oxy)-2-methylpropanoic acid (1m)**

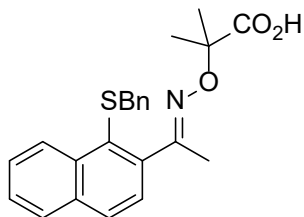

Following the general procedure, the reaction of **SI-1m** (1 mmol, 292.0 mg), **SI-11** (1.2 mmol, 186.7 mg) and sodium acetate (2.4 mmol, 196.9 mg) in EtOH (5 mL) at reflux afforded the product **1m** (78%, 305.3mg) as a yellow solid.

**<sup>1</sup>H NMR (300 MHz, CDCl<sub>3</sub>)** δ 8.60 (d, *J* = 7.8 Hz, 1H), 7.88 – 7.81 (m, 2H), 7.56 (pd, *J* = 6.8, 1.5 Hz, 2H), 7.30 (d, *J* = 8.4 Hz, 1H), 7.21 – 7.09 (m, 3H), 6.97 (dd, *J* = 6.8, 2.9 Hz, 2H), 3.93 (s, 2H), 2.19 (s, 3H), 1.61 (s, 6H); **<sup>13</sup>C NMR (75 MHz, CDCl<sub>3</sub>)** δ 177.3, 160.0, 141.5, 137.2, 134.5, 133.4, 129.8, 129.2, 128.4, 128.0, 127.8, 126.9, 126.6, 126.2, 126.0, 125.5, 81.0, 41.2, 24.0, 17.4; **HRMS** *m/z* (ESI): calcd. for C<sub>23</sub>H<sub>22</sub>NO<sub>3</sub>S (M-H)<sup>-</sup> 392.1326, found 392.1328.

**2-(((1-(3-(benzylthio)furan-2-yl)ethylidene)amino)oxy)-2-methylpropanoic acid (1n)**

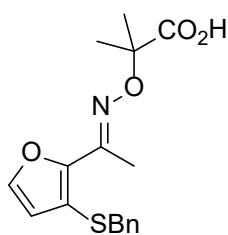

Following the general procedure, the reaction of **SI-1n** (1.3 mmol, 302.0 mg), **SI-11** (1.56 mmol, 240.5 mg) and sodium acetate (3.1 mmol, 256.0 mg) in EtOH (6.5 mL) at reflux afforded the product **1n** (81%, 349.6 mg) as a yellow solid. **<sup>1</sup>H**

**NMR (300 MHz, CDCl<sub>3</sub>)** δ 7.38 (d, *J* = 1.9 Hz, 1H), 7.35 – 7.20 (m, 5H), 6.40 (d, *J* = 1.9 Hz, 1H), 4.05 (s, 2H), 2.23 (s, 3H), 1.60 (s, 6H); **<sup>13</sup>C NMR (75 MHz, CDCl<sub>3</sub>)** δ 178.0, 150.0, 145.2, 142.7, 137.2, 128.6, 128.4, 127.1, 118.8, 113.2, 81.8, 38.1, 24.1, 11.7. **HRMS** *m/z* (ESI): calcd. for C<sub>17</sub>H<sub>18</sub>NO<sub>4</sub>S (M-H)<sup>-</sup> 332.0962, found 332.0960.

**2-(((1-(3-(benzylthio)thiophen-2-yl)ethylidene)amino)oxy)-2-methylpropanoic acid (1o)**

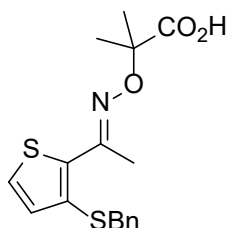

Following the general procedure, the reaction of **SI-1o** (0.6 mmol, 149.2 mg), **SI-11** (0.72 mmol, 112.1 mg) and sodium acetate (1.44 mmol, 118.1 mg) in EtOH (3 mL) at reflux afforded the product **1o** (84%, 176.3 mg) as a white solid. **<sup>1</sup>H NMR (300**

**MHz, CDCl<sub>3</sub>**) δ 10.03 (bs, 1H), 7.32 – 7.19 (m, 6H), 6.95 (d, *J* = 5.3 Hz, 1H), 4.09 (s, 2H), 2.30 (s, 3H), 1.62 (s, 6H); **<sup>13</sup>C NMR (75 MHz, CDCl<sub>3</sub>)** δ 178.5, 152.4, 137.3, 133.1, 132.7, 129.5, 128.8, 128.6, 127.3, 125.7, 81.9, 39.5, 24.3, 15.4; **HRMS** *m/z* (ESI): calcd. for C<sub>17</sub>H<sub>18</sub>NO<sub>3</sub>S<sub>2</sub> (M-H)<sup>-</sup> 348.0723, found 348.0746.

**2-(((1-(2-(benzylthio)pyridin-3-yl)ethylidene)amino)oxy)-2-methylpropanoic acid (1p)**

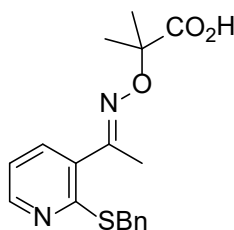

Following the general procedure, the reaction of **SI-1p** (0.2 mmol, 56.3 mg), **SI-11** (0.24 mmol, 37.4 mg) and sodium acetate (0.48 mmol, 39.4 mg) in EtOH (1 mL) at reflux afforded the product **1p** (77%, 61.7 mg) as a yellow oil. **<sup>1</sup>H NMR (300 MHz, CDCl<sub>3</sub>)** δ 9.92 (bs, 1H), 8.45 (dd, *J* = 4.8, 1.7 Hz, 1H), 7.46 (dd, *J* = 7.6, 1.7 Hz, 1H), 7.41 – 7.35 (m, 2H), 7.31 – 7.18 (m, 3H), 7.00 (dd, *J* = 7.6, 4.8 Hz, 1H), 4.41 (s, 2H), 2.23 (s, 3H), 1.62 (s, 6H); **<sup>13</sup>C NMR (75 MHz, CDCl<sub>3</sub>)** δ 179.0, 157.3, 155.2, 148.7, 138.2, 135.9, 131.2, 129.2, 128.3, 126.9, 119.0, 81.7, 35.2, 24.4, 15.2; **HRMS** *m/z* (ESI): calcd. for C<sub>18</sub>H<sub>19</sub>N<sub>2</sub>O<sub>3</sub>S (M-H)<sup>-</sup> 343.1111, found 343.1099.

**2-(((1-(2-(benzylthio)quinolin-3-yl)ethylidene)amino)oxy)-2-methylpropanoic acid (1q)**

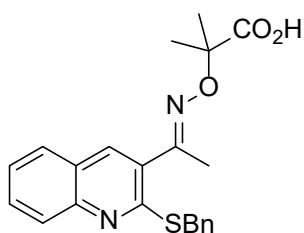

Following the general procedure, the reaction of **SI-1q** (0.7 mmol, 200.0 mg), **SI-11** (0.8 mmol, 130.7 mg) and sodium acetate (1.68 mmol, 137.8 mg) in EtOH (3.5 mL) at reflux afforded the product **1q** (80%, 215.1 mg) as a white solid. **<sup>1</sup>H NMR (300 MHz, CDCl<sub>3</sub>)** δ 10.87 (bs, 1H), 7.98 (d, *J* = 8.3 Hz, 1H), 7.87 (s, 1H), 7.77 – 7.63 (m, 2H), 7.55 – 7.46 (m, 2H), 7.46 – 7.38 (m, 1H), 7.35 – 7.18 (m, 3H), 4.57 (s, 2H), 2.34 (s, 3H), 1.68 (s, 6H); **<sup>13</sup>C NMR (75 MHz, CDCl<sub>3</sub>)** δ 179.3, 157.4, 155.4, 147.4, 138.5, 135.2, 130.3, 129.8, 129.4, 128.4, 127.9, 127.8, 126.9, 125.7, 125.3, 81.8, 35.1, 24.5, 15.7; **HRMS** *m/z* (ESI): calcd. for C<sub>22</sub>H<sub>21</sub>N<sub>2</sub>O<sub>3</sub>S (M-H)<sup>-</sup> 393.1278, found 393.1285.

### 2-(((2-(benzylthio)benzylidene)amino)oxy)-2-methylpropanoic acid (1r)

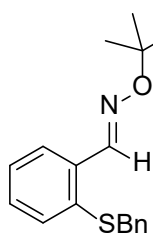

Following the general procedure, the reaction of **SI-1r** (1 mmol, 228.1 mg), **SI-11** (1.2 mmol, 186.7 mg) and sodium acetate (2.4 mmol, 196.9 mg) in EtOH (5 mL) at reflux afforded the product **1r** (88%, 290.9 mg) as a white solid. **<sup>1</sup>H NMR (300 MHz, CDCl<sub>3</sub>)** δ 11.29 (bs, 1H), 8.63 (s, 1H), 7.73 (dd, J = 7.4, 1.8 Hz, 1H), 7.32 (dd, J = 7.7, 1.4 Hz, 1H), 7.28 – 7.05 (m, 7H), 3.98 (s, 2H), 1.60 (s, 6H); **<sup>13</sup>C NMR (75 MHz, CDCl<sub>3</sub>)** δ 179.6, 148.3, 136.9, 135.6, 133.1, 132.7, 130.1, 128.8, 128.4, 127.3, 127.2, 127.2, 81.6, 40.3, 24.0; **HRMS** m/z (ESI): calcd. for C<sub>18</sub>H<sub>18</sub>NO<sub>3</sub>S (M-H)<sup>-</sup> 328.1013, found 328.1015.

### 2-(((2-(benzylthio)phenyl)(phenyl)methylene)amino)oxy)-2-methylpropanoic acid (1s)

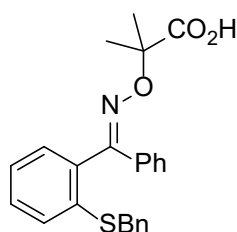

Following the general procedure, the reaction of **SI-1s** (1 mmol, 304.1 mg), **SI-11** (1.2 mmol, 186.7 mg) and sodium acetate (2.4 mmol, 196.9 mg) in MeOH (5 mL) at reflux afforded the product **1s** (67%, 272.8 mg) as a yellow solid. **<sup>1</sup>H NMR (300 MHz, CDCl<sub>3</sub>)** δ 7.45 – 7.25 (m, 9H), 7.24 – 7.10 (m, 5H), 4.00 (d, J = 9.8 Hz, 2H), 1.55 (d, J = 4.4 Hz, 6H); **<sup>13</sup>C NMR (75 MHz, CDCl<sub>3</sub>)** δ 176.2, 157.6, 137.1, 135.6, 134.8, 133.7, 131.6, 129.9, 129.1, 129.0, 128.9, 128.4, 128.4, 127.3, 127.2, 127.0, 82.7, 39.1, 24.3; **HRMS** m/z (ESI): calcd. for C<sub>24</sub>H<sub>22</sub>NO<sub>3</sub>S (M-H)<sup>-</sup> 404.1326, found 404.1325.

### 2-(((1-(2-(benzylselanyl)phenyl)ethylidene)amino)oxy)-2-methylpropanoic acid (1t)

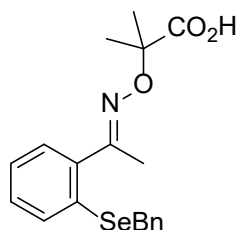

Following the general procedure, the reaction of **SI-10a** (1 mmol, 289.2 mg), **SI-11** (1.2 mmol, 186.7 mg) and sodium acetate (2.4 mmol, 196.9 mg) in MeOH (5 mL) at reflux afforded the product **1t** (76%, 295.5 mg) as a pale yellow solid. **<sup>1</sup>H NMR (300 MHz, CDCl<sub>3</sub>)** δ 7.57 – 7.47 (m, 1H), 7.37 – 7.20 (m, 8H), 4.08 (s, 2H), 2.26 (s, 3H), 1.63 (s, 6H); **<sup>13</sup>C NMR (75 MHz, CDCl<sub>3</sub>)** δ 177.7, 159.0, 139.0, 138.0,

132.6, 131.1, 129.2, 128.9, 128.7, 128.4, 126.8, 126.5, 81.5, 32.3, 24.5, 16.1; **HRMS** m/z (ESI): calcd. for C<sub>19</sub>H<sub>20</sub>NO<sub>3</sub>Se (M-H)<sup>-</sup> 390.0614, found 390.0623.

**2-(((2-(benzylselanyl)-5-chlorobenzylidene)amino)oxy)-2-methylpropanoic acid (1u)**

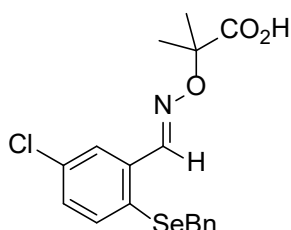

Following the general procedure, the reaction of **SI-10b** (1 mmol, 309.7 mg), **SI-11** (1.2 mmol, 186.7 mg) and sodium acetate (2.4 mmol, 196.9 mg) in MeOH (5 mL) at reflux afforded the product **1u** (65%, 268.2 mg) as a yellow solid.

**<sup>1</sup>H NMR (300 MHz, CDCl<sub>3</sub>)** δ 8.53 (s, 1H), 7.75 (d, *J* = 2.4 Hz, 1H), 7.45 (d, *J* = 8.3 Hz, 1H), 7.33 – 7.16 (m, 6H), 4.04 (s, 2H), 1.68 (s, 6H); **<sup>13</sup>C NMR (75 MHz, CDCl<sub>3</sub>)** δ 178.6, 149.3, 137.6, 136.8, 135.6, 134.2, 130.0, 129.4, 128.8, 128.5, 127.3, 127.1, 82.0, 33.1, 24.1; **HRMS** m/z (ESI): calcd. for C<sub>18</sub>H<sub>17</sub>ClNO<sub>3</sub>Se (M-H)<sup>-</sup> 410.0068, found 410.0072.

*Procedure for the synthesis of oxime 1a'*:

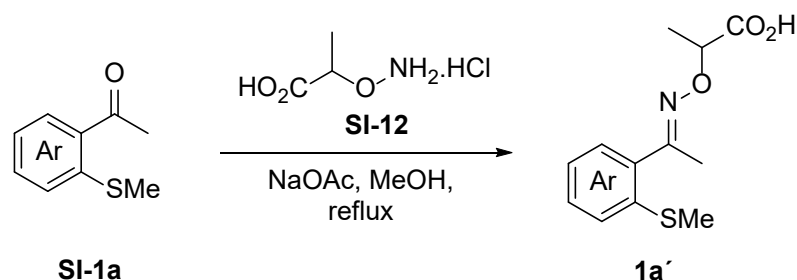

Compound **SI-12** was prepared following a reported procedure in the literature.<sup>[18]</sup>

Compound **1a'** was prepared following a slightly modified procedure reported in the literature.<sup>[18]</sup> A solution of ketone (1.0 equiv) in EtOH (0.2M) was treated with 2-(aminooxy)propanoic acid hydrochloride (**SI-12**) (1.2 equiv), sodium acetate (2.4 equiv) and heated to reflux until completion by TLC analysis. The mixture was then allowed to cool to room temperature and water was added. The resulting aqueous solution was extracted with EtOAc (3x) and the combined organic layers were dried over anhydrous MgSO<sub>4</sub>, filtered and concentrated under vacuum to provide the product. Then, the residue was subjected to flash chromatography (silica gel, cyclohexane/EtOAc) to give the analytically pure product **1a'**.



## 2-(((1-(2-(methylthio)phenyl)ethylidene)amino)oxy)propanoic acid (**1a'**)

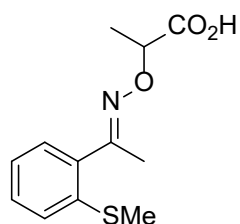

Following the procedure, the reaction of **SI-1a** (1 mmol, 166.2 mg), **SI-12** (1.2 mmol, 168.6 mg) and sodium acetate (2.4 mmol, 196.9 mg) in EtOH (5 mL) at reflux afforded the product **1a'** (78%, 198.0 mg) as a yellow oil. **<sup>1</sup>H NMR (300 MHz, CDCl<sub>3</sub>)** δ 10.19 (s, 1H), 7.27 – 7.00 (m, 4H), 4.77 (q, *J* = 7.0 Hz, 1H), 2.31 (s, 3H), 2.21 (s, 3H), 1.51 (d, *J* = 7.0 Hz, 3H); **<sup>13</sup>C NMR (75 MHz, CDCl<sub>3</sub>)** δ 178.4, 158.4, 137.5, 136.6, 129.2, 128.8, 127.1, 125.1, 21.4, 16.9, 16.8, 16.3; **HRMS** *m/z* (ESI): calcd. for C<sub>12</sub>H<sub>14</sub>NO<sub>3</sub>S (M-H)<sup>-</sup> 252.0700, found 252.0704.

*Procedure for the synthesis of oxime 1a''*:

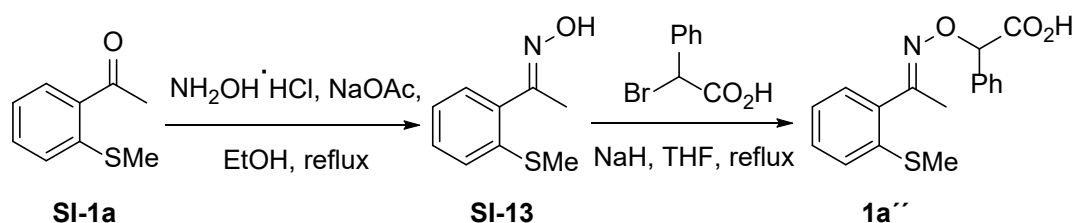

Compound **1a''** was prepared following a slightly modified procedure reported in the literature.<sup>[19]</sup> A solution of **SI-1a** (0.8 mmol, 139.2 mg, 1.0 equiv) in EtOH (0.5 M) was treated with hydroxylamine hydrochloride (1.3 mmol, 93.1 mg, 1.6 equiv), sodium acetate (1.7 mmol, 137.4 mg, 2.0 equiv) and heated to reflux for 12 h. The mixture was then allowed to cool to room temperature and concentrated under vacuum to provide the product **SI-13** as a white solid, which was used for the next step without purification. Then, **SI-13** was added dropwise to a stirred suspension of NaH 60% in mineral oil (2.5 mmol, 60.3 mg, 3.0 equiv) in dry THF (1.5 M) at 0 °C (ice bath) under inert atmosphere and the mixture was stirred for 15 min. Afterwards, a solution of 2-bromo-2-phenylacetic acid (0.9 mmol, 198.1 mg, 1.1 equiv) in dry THF (0.5 M) was added and the reaction was heated to 75 °C for 12 h. After this time, the reaction was cooled to room temperature and concentrate hydrochloric acid was added until pH 2. The resulting solution was extracted with EtOAc (3x) and the combined organic layers were dried over MgSO<sub>4</sub>, filtered and concentrated under vacuum to provide the

product. Then, the residue was subjected to flash chromatography (silica gel, cyclohexane/EtOAc) to give the analytically pure product **1a''**.

### 2-(((1-(2-(methylthio)phenyl)ethylidene)amino)oxy)-2-phenylacetic acid (**1a''**)

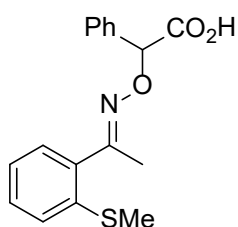

Following the procedure, the reaction of **SI-1a** (0.8 mmol, 139.2 mg) afforded the product **1a''** (40% for two reaction steps, 106.5 mg) as white solid. **<sup>1</sup>H NMR (300 MHz, CDCl<sub>3</sub>)** δ 11.00 (bs, 1H), 7.66 – 7.58 (m, 2H), 7.47 – 7.40 (m, 3H), 7.37 – 7.26 (m, 3H), 7.23 – 7.16 (m, 1H), 5.81 (s, 1H), 2.41 (s, 3H), 2.37 (s, 3H); **<sup>13</sup>C NMR (75 MHz, CDCl<sub>3</sub>)** δ 176.7, 159.1, 137.6, 136.5, 134.7, 129.3, 129.1, 128.9, 128.7, 127.7, 127.2, 125.1, 83.2, 16.9, 16.6; **HRMS** m/z (ESI): calcd. for C<sub>17</sub>H<sub>16</sub>NO<sub>3</sub>S (M-H)<sup>-</sup> 314.0856, found 314.0856.

## 3. Optimization of the Reaction Conditions

*General procedure for the optimization of the reaction conditions of the synthesis of isothiazoles 2:*

In an oven-dried glass vial equipped with a stirring bar, 2-methyl-2-(((1-(2-(methylthio)phenyl)ethylidene)amino)oxy)propanoic acid (**1a**, 0.05 mmol, 13.4 mg, 1 equiv), the base (0.05 mmol, 1 equiv), the photocatalyst (2.5·10<sup>-3</sup> mmol, 0.05 equiv) and the respective solvent (0.67 mL) were added under air. Then, the vial was closed with a PTFE/rubber septum perforated several times to enable the air enter into the reaction. Afterwards, the mixture was stirred and irradiated at 450 nm using 380 mW single LEDs in a custom-made temperature-controlled system (see Figure S1) for 16h at 20 °C. Then, the volatiles were removed and yield was determined by <sup>1</sup>H-NMR analysis using 1,3,5-trimethoxybenzene (8.4 mg, 0.05 mmol) as internal standard.

**Table S1.** Optimization of reaction conditions with **1a**.

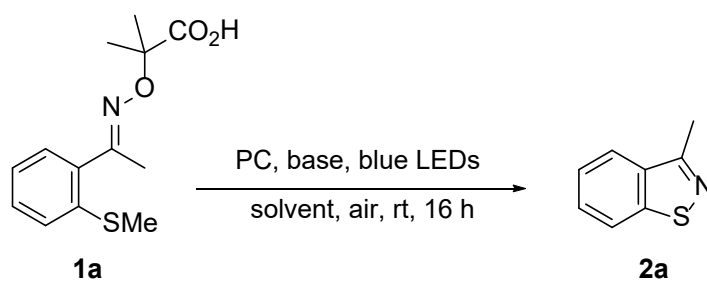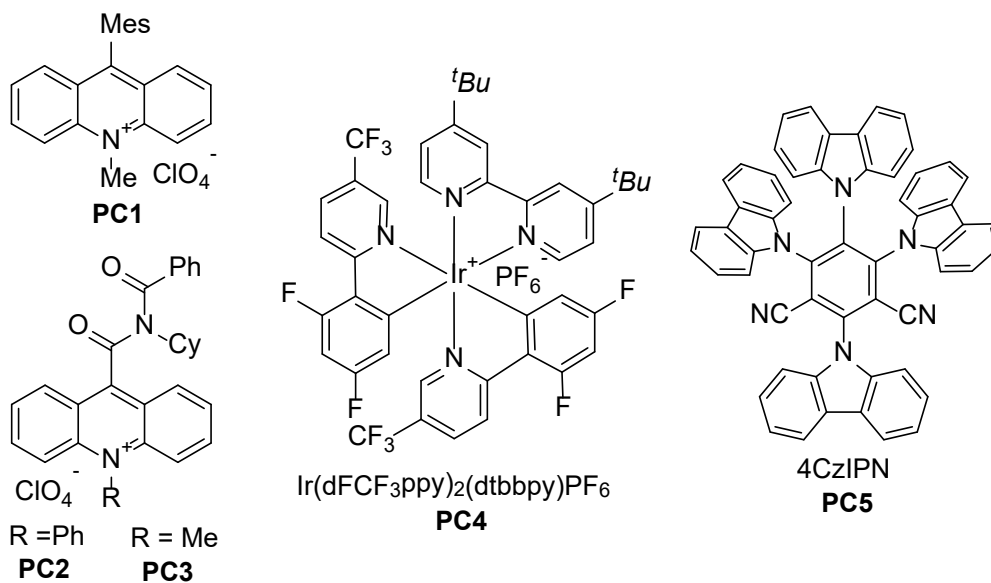

| entry | PC  | base                             | solvent | yield (%) <sup>[a]</sup> |
|-------|-----|----------------------------------|---------|--------------------------|
| 1     | PC1 | CsF                              | DCE     | 17                       |
| 2     | PC1 | CsF                              | DCM     | 20                       |
| 3     | PC1 | CsF                              | THF     | 9                        |
| 4     | PC1 | CsF                              | DMF     | 21                       |
| 5     | PC1 | CsF                              | MeCN    | 10                       |
| 6     | PC1 | CsF                              | Acetone | 20                       |
| 7     | PC1 | Cs <sub>2</sub> CO <sub>3</sub>  | Acetone | 26                       |
| 8     | PC1 | K <sub>2</sub> CO <sub>3</sub>   | Acetone | 26                       |
| 9     | PC1 | Na <sub>2</sub> CO <sub>3</sub>  | Acetone | 53                       |
| 10    | PC1 | Li <sub>2</sub> CO <sub>3</sub>  | Acetone | 9                        |
| 11    | PC1 | NaF                              | Acetone | 17                       |
| 12    | PC1 | Na <sub>2</sub> HPO <sub>4</sub> | Acetone | 41                       |

|                   |            |                    |                |           |
|-------------------|------------|--------------------|----------------|-----------|
| 13                | <b>PC1</b> | NaHCO <sub>3</sub> | Acetone        | 23        |
| <b>14</b>         | <b>PC1</b> | <b>NaOAc</b>       | <b>Acetone</b> | <b>56</b> |
| 15                | <b>PC2</b> | NaOAc              | Acetone        | 35        |
| 16                | <b>PC3</b> | NaOAc              | Acetone        | 31        |
| 17                | <b>PC4</b> | NaOAc              | Acetone        | 32        |
| 18                | <b>PC5</b> | NaOAc              | Acetone        | 44        |
| 19 <sup>[b]</sup> | <b>PC1</b> | NaOAc              | Acetone        | 54        |
| 20 <sup>[c]</sup> | <b>PC1</b> | NaOAc              | Acetone        | 4         |
| 21                | -          | NaOAc              | Acetone        | 0         |
| 22                | <b>PC1</b> | -                  | Acetone        | 0.        |
| 23 <sup>[d]</sup> | <b>PC1</b> | NaOAc              | Acetone        | 0.        |

<sup>[a]</sup> The yield was determined from the crude <sup>1</sup>H-NMR. <sup>[b]</sup> Oxygen was used instead air. <sup>[c]</sup> Argon was used instead air. <sup>[d]</sup> The reaction was performed in the dark. DCE = 1,2-Dichloroethane. DCM = Dichloromethane, THF = Tetrahydrofuran, DMF = *N,N*-Dimethylformamide.

#### 4. Optimization of the $\alpha$ -Imino-oxy Acid Structure

*General procedure for the optimization of the  $\alpha$ -imino-oxy acid structure in the synthesis of isothiazoles 2:*

In an oven-dried glass vial equipped with a stirring bar, the corresponding  $\alpha$ -imino-oxy acid **1** (0.05 mmol, 1 equiv), NaOAc (0.05 mmol, 4.1 mg, 1 equiv), photocatalyst **PC1**, 9-mesityl-10-methyl acridinium perchlorate, ( $2.5 \cdot 10^{-3}$  mmol, 1.05 mg, 0.05 equiv) and acetone (0.67 mL) were added under air. Then, the vial was closed with a PTFE/rubber septum perforated several times to enable the air enter into the reaction. Afterwards, the mixture was stirred and irradiated at 450 nm using 380 mW single LEDs in a custom-made temperature-controlled system (see Figure S1) for 16h at 20 °C. Then, the volatiles were removed and yield was determined by <sup>1</sup>H-NMR analysis using 1,3,5-trimethoxybenzene (8.4 mg, 0.05 mmol) as internal standard.

**Table S2.** Optimization of  $\alpha$ -imino-oxy acid structure.

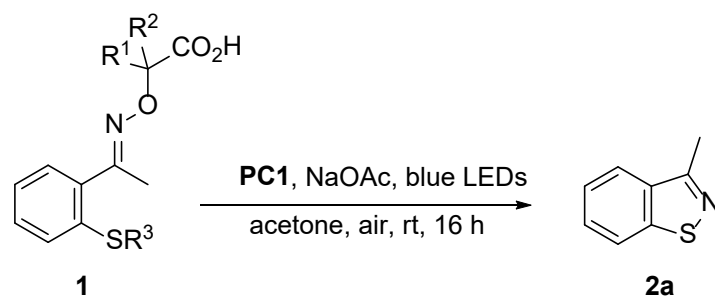

| entry            | $R_1$     | $R_2$     | $R_3$        | yield (%) <sup>[a]</sup>     |
|------------------|-----------|-----------|--------------|------------------------------|
| 1                | Me        | H         | Me           | 33                           |
| 2                | Me        | Me        | Me           | 56                           |
| 3                | Ph        | H         | Me           | 58                           |
| 4                | Me        | Me        | <i>i</i> -Pr | 44                           |
| 5                | Me        | Me        | <i>t</i> -Bu | 68                           |
| 6                | Me        | Me        | Ph           | 4                            |
| 7                | <b>Me</b> | <b>Me</b> | <b>Bn</b>    | <b>85 (81)<sup>[b]</sup></b> |
| 8 <sup>[c]</sup> | Me        | Me        | Bn           | 85                           |

<sup>[a]</sup> The yield was determined from the crude  $^1H$ -NMR. <sup>[b]</sup> Isolated yield in 0.1 mmol scale in parentheses. <sup>[c]</sup> The reaction was performed with a blue LED spot of 40W instead of 380 mW single LEDs.

## 5. General Procedure and Characterization of Isothiazoles **2**

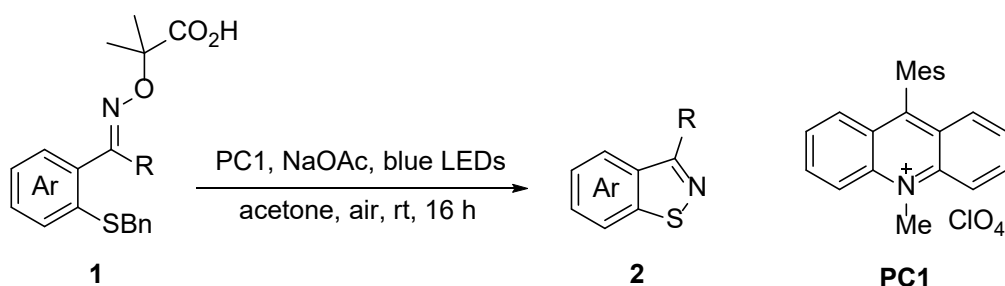

### General procedure for the synthesis of isothiazoles **2**:

In an oven-dried glass vial equipped with a stirring bar, **1** (0.1 mmol, 1 equiv), NaOAc (0.1 mmol, 8.2 mg, 1 equiv), photocatalyst **PC1**, 9-mesityl-10-methyl acridinium perchlorate, ( $5 \cdot 10^{-3}$  mmol, 2.1 mg, 0.05 equiv) and acetone (1.33 mL) were

added under air. Then, the vial was closed with a PTFE/rubber septum perforated several times to enable the air enter into the reaction. Afterwards, the mixture was stirred and irradiated at 450 nm using 380 mW single LEDs in a custom-made temperature-controlled system (see Figure S1) for 16h at 20 °C. Then, the volatiles were removed and the analytically pure product **2** was obtained by flash chromatography (Iatrobeds silica gel; cyclohexane/EtOAc).

### 3-methylbenzo[d]isothiazole (**2a**)

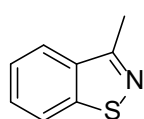

Following the general procedure, the reaction of **1d** (0.1 mmol, 34.0 mg), NaOAc (0.1 mmol, 8.2 mg) and photocatalyst **PC1** (5 mol%, 2.1 mg) in acetone (1.33 mL) irradiated at 450 nm afforded the product **2a** (81%, 11.9 mg) as a yellow oil. **<sup>1</sup>H NMR (300 MHz, CDCl<sub>3</sub>)** δ 7.97 – 7.90 (m, 2H), 7.56 – 7.49 (m, 1H), 7.48 – 7.40 (m, 1H), 2.76 (s, 3H). Spectral data is in accordance with the literature.<sup>[20]</sup>

### 6-fluoro-3-methylbenzo[d]isothiazole (**2b**)

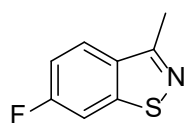

Following the general procedure, the reaction of **1f** (0.1 mmol, 35.4 mg), NaOAc (0.1 mmol, 8.2 mg) and photocatalyst **PC1** (5 mol%, 2.1 mg) in acetone (1.33 mL) irradiated at 450 nm afforded the product **2b** (82%, 13.4 mg) as a white solid. **<sup>1</sup>H NMR (300 MHz, C<sub>6</sub>D<sub>6</sub>)** δ 7.05 (dd, *J* = 8.8, 4.9 Hz, 1H), 6.86 (dd, *J* = 8.5, 2.2 Hz, 1H), 6.70 (td, *J* = 8.7, 2.2 Hz, 1H), 2.26 (s, 3H); **<sup>13</sup>C NMR (75 MHz, C<sub>6</sub>D<sub>6</sub>)** δ 162.6 (d, *J* = 249.6 Hz), 162.1, 154.2 (d, *J* = 10.4 Hz), 132.4, 124.9 (d, *J* = 10.2 Hz), 113.6 (d, *J* = 25.4 Hz), 105.9 (d, *J* = 25.6 Hz), 17.0; **<sup>19</sup>F NMR (282 MHz, C<sub>6</sub>D<sub>6</sub>)** δ -113.77; **HRMS** *m/z* (ESI): calcd. for C<sub>8</sub>H<sub>6</sub>FNS (M)<sup>+</sup> 167.0205, found 167.0200.

### 6-methoxy-3-methylbenzo[d]isothiazole (**2c**)

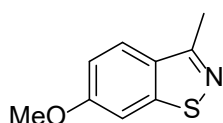

Following the general procedure, the reaction of **1g** (0.1 mmol, 37.1 mg), NaOAc (0.1 mmol, 8.2 mg) and photocatalyst **PC1** (5 mol%, 2.1 mg) in acetone (1.33 mL) irradiated at 450 nm afforded the product **2c** (89%, 15.8 mg) as a white solid. **<sup>1</sup>H NMR (300 MHz, C<sub>6</sub>D<sub>6</sub>)** δ 7.26 (d, *J* = 8.8 Hz, 1H), 6.87 (dd, *J* = 8.8, 2.2 Hz, 1H), 6.74 (d, *J* = 2.2 Hz, 1H), 3.23 (s, 3H),

2.36 (s, 3H); <sup>13</sup>C NMR (75 MHz, C<sub>6</sub>D<sub>6</sub>) δ 162.1, 160.0, 155.1, 130.3, 124.2, 115.9, 101.1, 55.1, 17.1; HRMS m/z (ESI): calcd. for C<sub>9</sub>H<sub>10</sub>NOS (M+H)<sup>+</sup> 180.0478, found 180.0480.

### 5-methoxy-3-methylbenzo[d]isothiazole (2d)

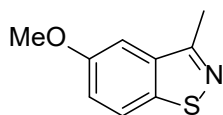

Following the general procedure, the reaction of **1h** (0.1 mmol, 37.3 mg), NaOAc (0.1 mmol, 8.2 mg) and photocatalyst **PC1** (5 mol%, 2.1 mg) in acetone (1.33 mL) irradiated at 450 nm afforded the product **2d** (75%, 13.4 mg) as a white solid. <sup>1</sup>H NMR (300 MHz, (CD<sub>3</sub>)<sub>2</sub>CO) δ 7.96 (d, J = 8.8 Hz, 1H), 7.52 (d, J = 2.3 Hz, 1H), 7.23 (dd, J = 8.8, 2.3 Hz, 1H), 3.93 (s, 3H), 2.67 (s, 3H); <sup>13</sup>C NMR (75 MHz, (CD<sub>3</sub>)<sub>2</sub>CO) δ 163.1, 159.1, 146.0, 137.5, 121.7, 120.0, 105.4, 56.2, 17.6; HRMS m/z (ESI): calcd. for C<sub>9</sub>H<sub>10</sub>NOS (M+H)<sup>+</sup> 180.0478, found 180.0482.

### 5-bromo-3-methylbenzo[d]isothiazole (2e)

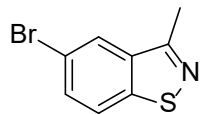

Following the general procedure, the reaction of **1i** (0.1 mmol, 42.0 mg), NaOAc (0.1 mmol, 8.2 mg) and photocatalyst **PC1** (5 mol%, 2.1 mg) in acetone (1.33 mL) irradiated at 450 nm afforded the product **2e** (68%, 15.6 mg) as a white solid. <sup>1</sup>H NMR (300 MHz, (CD<sub>3</sub>)<sub>2</sub>CO) δ 8.28 (s, 1H), 8.09 (d, J = 8.6 Hz, 1H), 7.72 (d, J = 8.6 Hz, 1H), 2.73 (s, 3H); <sup>13</sup>C NMR (75 MHz, (CD<sub>3</sub>)<sub>2</sub>CO) δ 163.2, 152.1, 137.9, 131.2, 127.4, 122.9, 119.2, 17.5; HRMS m/z (ESI): calcd. for C<sub>8</sub>H<sub>6</sub>BrNS (M)<sup>+</sup> 227.9477, found 226.9404.

### 3-methyl-5-(trifluoromethyl)benzo[d]isothiazole (2f)

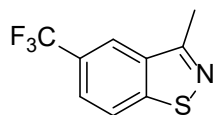

Following the general procedure, the reaction of **1j** (0.1 mmol, 40.6 mg), NaOAc (0.1 mmol, 8.2 mg) and photocatalyst **PC1** (5 mol%, 2.1 mg) in acetone (1.33 mL) irradiated at 450 nm afforded the product **2f** (71%, 15.2 mg) as a white solid. <sup>1</sup>H NMR (300 MHz, CD<sub>2</sub>Cl<sub>2</sub>) δ 8.28 – 8.22 (m, 1H), 8.07 (d, J = 8.5 Hz, 1H), 7.74 (dd, J = 8.5, 1.4 Hz, 1H), 2.78 (s, 3H); <sup>13</sup>C NMR (75 MHz, CD<sub>2</sub>Cl<sub>2</sub>) δ 163.9, 155.8, 135.4, 127.6 (q, J = 32.6 Hz), 125.0 (q, J = 272.0 Hz), 124.2 (q, J = 3.2 Hz), 121.5 (q, J = 4.3 Hz), 121.4, 17.8; <sup>19</sup>F NMR (282 MHz, CD<sub>2</sub>Cl<sub>2</sub>) δ -61.17; HRMS m/z (ESI): calcd. for C<sub>9</sub>H<sub>6</sub>F<sub>3</sub>NS (M)<sup>+</sup> 217.0173, found

217.0166.

### 3-methyl-[1,3]dioxolo[4',5':4,5]benzo[1,2-d]isothiazole (2g)

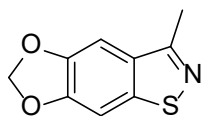

Following the general procedure, the reaction of **1k** (0.1 mmol, 36.0 mg), NaOAc (0.1 mmol, 8.2 mg) and photocatalyst **PC1** (5 mol%, 2.1 mg) in acetone (1.33 mL) irradiated at 450 nm afforded the product **2g** (66%, 11.8 mg) as a white solid. **<sup>1</sup>H NMR (300 MHz, C<sub>6</sub>D<sub>6</sub>)** δ 6.77 (s, 1H), 6.65 (s, 1H), 5.25 (s, 2H), 2.27 (s, 3H); **<sup>13</sup>C NMR (75 MHz, C<sub>6</sub>D<sub>6</sub>)** δ 161.4, 149.8, 148.7, 147.4, 130.8, 102.0, 101.2, 98.6, 17.1; **HRMS** m/z (ESI): calcd. for C<sub>9</sub>H<sub>8</sub>NO<sub>2</sub>S (M+H)<sup>+</sup> 194.0270, found 194.0265.

### 7-(benzyloxy)-3-methylbenzo[d]isothiazole (2h)

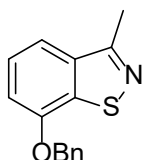

Following the general procedure, the reaction of **1l** (0.1 mmol, 44.8 mg), NaOAc (0.1 mmol, 8.2 mg) and photocatalyst **PC1** (5 mol%, 2.1 mg) in acetone (1.33 mL) irradiated at 450 nm afforded the product **2h** (88%, 22.4 mg) as a white solid. **<sup>1</sup>H NMR (300 MHz, CD<sub>2</sub>Cl<sub>2</sub>)** δ 7.55 (dd, *J* = 8.0, 0.8 Hz, 1H), 7.52 – 7.46 (m, 2H), 7.46 – 7.33 (m, 4H), 6.98 (d, *J* = 7.6 Hz, 1H), 5.29 (s, 2H), 2.71 (s, 3H); **<sup>13</sup>C NMR (75 MHz, CD<sub>2</sub>Cl<sub>2</sub>)** δ 163.7, 152.6, 143.0, 137.9, 137.0, 129.2, 128.7, 128.0, 127.0, 116.4, 108.8, 71.1, 17.9; **HRMS** m/z (ESI): calcd. for C<sub>15</sub>H<sub>14</sub>NOS (M+H)<sup>+</sup> 256.0791, found 256.0800.

### 3-methylnaphtho[2,1-d]isothiazole (2i)

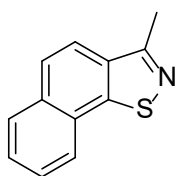

Following the general procedure, the reaction of **1m** (0.1 mmol, 39.3 mg), NaOAc (0.1 mmol, 8.2 mg) and photocatalyst **PC1** (5 mol%, 2.1 mg) in acetone (1.33 mL) irradiated at 450 nm afforded the product **2i** (70%, 14.3 mg) as a white solid. **<sup>1</sup>H NMR (300 MHz, (CD<sub>3</sub>)<sub>2</sub>CO)** δ 8.24 – 8.17 (m, 1H), 8.16 – 8.10 (m, 1H), 8.00 (d, *J* = 8.8 Hz, 1H), 7.92 (d, *J* = 8.8 Hz, 1H), 7.76 – 7.68 (m, 2H), 2.79 (s, 3H); **<sup>13</sup>C NMR (126 MHz, (CD<sub>3</sub>)<sub>2</sub>CO)** δ 164.7, 153.9, 133.9, 133.1, 130.0, 129.1, 128.4, 127.4, 127.3, 126.1, 121.6, 17.7; **HRMS** m/z (ESI): calcd. for C<sub>12</sub>H<sub>9</sub>NS (M)<sup>+</sup> 199.0456, found 199.0465.



### 3-methylfuro[2,3-*d*]isothiazole (2j)

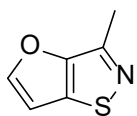

Following the general procedure, the reaction of **1n** (0.1 mmol, 33.3 mg), NaOAc (0.1 mmol, 8.2 mg) and photocatalyst **PC1** (5 mol%, 2.1 mg) in acetone (1.33 mL) irradiated at 450 nm afforded the product **2j** (32%, 4.5 mg) as a white solid. **<sup>1</sup>H NMR (300 MHz, (CD<sub>3</sub>)<sub>2</sub>CO)** δ 7.91 (dd, *J* = 3.7, 2.1 Hz, 1H), 7.01 (dd, *J* = 3.7, 2.1 Hz, 1H), 2.50 (d, *J* = 3.7 Hz, 3H); **<sup>13</sup>C NMR (126 MHz, (CD<sub>3</sub>)<sub>2</sub>CO)** δ 152.0, 148.3, 146.4, 135.3, 107.4, 15.8; **HRMS** *m/z* (ESI): calcd. for C<sub>6</sub>H<sub>6</sub>NOS (M+H)<sup>+</sup> 140.0165, found 140.0169.

### 3-methylthieno[2,3-*d*]isothiazole (2k)

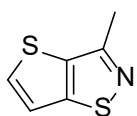

Following the general procedure, the reaction of **1o** (0.1 mmol, 35.0 mg), NaOAc (0.1 mmol, 8.2 mg) and photocatalyst **PC1** (5 mol%, 2.1 mg) in acetone (1.33 mL) irradiated at 450 nm afforded the product **2k** (36%, 5.6 mg) as a brown oil. **<sup>1</sup>H NMR (300 MHz, (CD<sub>3</sub>)<sub>2</sub>CO)** δ 7.89 (d, *J* = 5.1 Hz, 1H), 7.48 (d, *J* = 5.1 Hz, 1H), 2.57 (s, 3H). Spectral data is in accordance with the literature.<sup>[21]</sup>

### 3-methylisothiazolo[5,4-*b*]pyridine (2l)

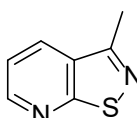

Following the general procedure, the reaction of **1p** (0.1 mmol, 34.2 mg), NaOAc (0.1 mmol, 8.2 mg) and photocatalyst **PC1** (5 mol%, 2.1 mg) in acetone (1.33 mL) irradiated at 450 nm afforded the product **2l** (86%, 12.8 mg) as a white solid. **<sup>1</sup>H NMR (300 MHz, C<sub>6</sub>D<sub>6</sub>)** δ 8.40 (dd, *J* = 4.5, 1.4 Hz, 1H), 7.19 (dd, *J* = 8.2, 1.4 Hz, 1H), 6.52 (dd, *J* = 8.2, 4.5 Hz, 1H), 2.19 (s, 3H). Spectral data is in accordance with the literature.<sup>[22]</sup>

### 3-methylisothiazolo[5,4-*b*]quinoline (2m)

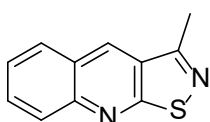

Following the general procedure, the reaction of **1q** (0.1 mmol, 39.2 mg), NaOAc (0.1 mmol, 8.2 mg) and photocatalyst **PC1** (5 mol%, 2.1 mg) in acetone (1.33 mL) irradiated at 450 nm afforded the product **2m** (69%, 13.8 mg) as a white solid. **<sup>1</sup>H NMR (300 MHz, (CD<sub>3</sub>)<sub>2</sub>CO)** δ 12 (s, 1H), 8.22 (d, *J* = 8.3 Hz, 1H), 8.13 (d, *J* = 8.7 Hz, 1H), 7.99 – 7.90 (m, 1H), 7.72 – 7.64 (m, 1H), 2.83 (s, 3H); **<sup>13</sup>C NMR (75 MHz, (CD<sub>3</sub>)<sub>2</sub>CO)** δ 171.3, 163.9, 149.2, 133.9, 132.8, 130.6, 129.3, 127.5, 126.9, 125.7, 18.3; **HRMS** *m/z* (ESI): calcd. for

C<sub>11</sub>H<sub>9</sub>N<sub>2</sub>S (M+H)<sup>+</sup> 201.0481, found 201.0481.

### benzo[d]isothiazole (2n)

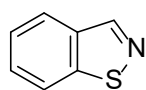

Following the general procedure, the reaction of **1r** (0.1 mmol, 32.9 mg), NaOAc (0.1 mmol, 8.2 mg) and photocatalyst **PC1** (5 mol%, 2.1 mg) in acetone (1.33 mL) irradiated at 450 nm afforded the product **2n** (27%, 3.6 mg) as a white solid. **<sup>1</sup>H NMR (300 MHz, (CD<sub>3</sub>)<sub>2</sub>CO)** δ 8.93 (s, 1H), 8.08 (d, *J* = 8.0 Hz, 1H), 7.98 (d, *J* = 8.0 Hz, 1H), 7.58 – 7.50 (m, 1H), 7.45 (ddd, *J* = 8.0, 7.0, 1.0 Hz, 1H). Spectral data is in accordance with the literature.<sup>[23]</sup>

### 3-phenylbenzo[d]isothiazole (2o)

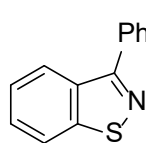

Following the general procedure, the reaction of **1s** (0.1 mmol, 28.3 mg), NaOAc (0.1 mmol, 8.2 mg) and photocatalyst **PC1** (5 mol%, 2.1 mg) in acetone (1.33 mL) irradiated at 450 nm afforded the product **2o** (85%, 17.9 mg) as a white solid. **<sup>1</sup>H NMR (300 MHz, (CD<sub>3</sub>)<sub>2</sub>CO)** δ 8.27 (d, *J* = 8.1 Hz, 1H), 8.24 (d, *J* = 8.1 Hz, 1H), 7.93 (dd, *J* = 8.0, 1.5 Hz, 2H), 7.70 – 7.64 (m, 2H), 7.63 – 7.52 (m, 3H); **<sup>13</sup>C NMR (75 MHz, (CD<sub>3</sub>)<sub>2</sub>CO)** δ 165.1, 154.6, 136.3, 134.7, 130.4, 129.9, 129.7, 128.8, 126.4, 125.7, 121.4; **HRMS** *m/z* (ESI): calcd. for C<sub>13</sub>H<sub>10</sub>NS (M+H)<sup>+</sup> 212.0528, found 212.0534.

### 3-methylbenzo[d][1,2]selenazole (2p)

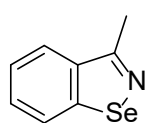

Following the general procedure, the reaction of **1t** (0.1 mmol, 39.0 mg), NaOAc (0.1 mmol, 8.2 mg) and photocatalyst **PC1** (5 mol%, 2.1 mg) in acetone (1.33 mL) irradiated at 450 nm afforded the product **2p** (82%, 16.1 mg) as a white solid. **<sup>1</sup>H NMR (300 MHz, (CD<sub>3</sub>)<sub>2</sub>CO)** δ 8.19 (d, *J* = 8.0 Hz, 1H), 8.03 (dd, *J* = 8.0, 1.1 Hz, 1H), 7.60 – 7.54 (m, 1H), 7.51 (ddd, *J* = 8.0, 7.1, 1.2 Hz, 1H), 2.65 (s, 3H); **<sup>13</sup>C NMR (75 MHz, (CD<sub>3</sub>)<sub>2</sub>CO)** δ 167.6, 153.0, 139.4, 128.8, 126.9, 125.9, 125.2, 20.1; **HRMS** *m/z* (ESI): calcd. for C<sub>8</sub>H<sub>8</sub>NS (M+H)<sup>+</sup> 197.9816, found 197.9819.

### 5-chlorobenzo[d][1,2]selenazole (2q)

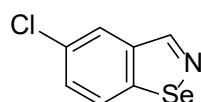

Following the general procedure, the reaction of **1u** (0.1 mmol, 41.1 mg), NaOAc (0.1 mmol, 8.2 mg) and photocatalyst **PC1** (5 mol%, 2.1 mg) in acetone (1.33 mL) irradiated at 450 nm afforded the product **2q**

(60%, 13.0 mg) as a white solid.  $^1\text{H NMR}$  (300 MHz,  $(\text{CD}_3)_2\text{CO}$ )  $\delta$  9.47 (s, 1H), 8.27 (d,  $J = 8.6$  Hz, 1H), 8.24 (d,  $J = 2.0$  Hz, 1H), 7.57 (dd,  $J = 8.6, 2.0$  Hz, 1H);  $^{13}\text{C NMR}$  (75 MHz,  $(\text{CD}_3)_2\text{CO}$ )  $\delta$  160.6, 151.7, 142.2, 132.0, 129.1, 126.7, 126.6; **HRMS**  $m/z$  (ESI): calcd. for  $\text{C}_7\text{H}_4\text{ClNSe}$  (M) $^+$  216.9197, found 216.9202.

## 6. Synthesis of Brassilexin Derivative 4

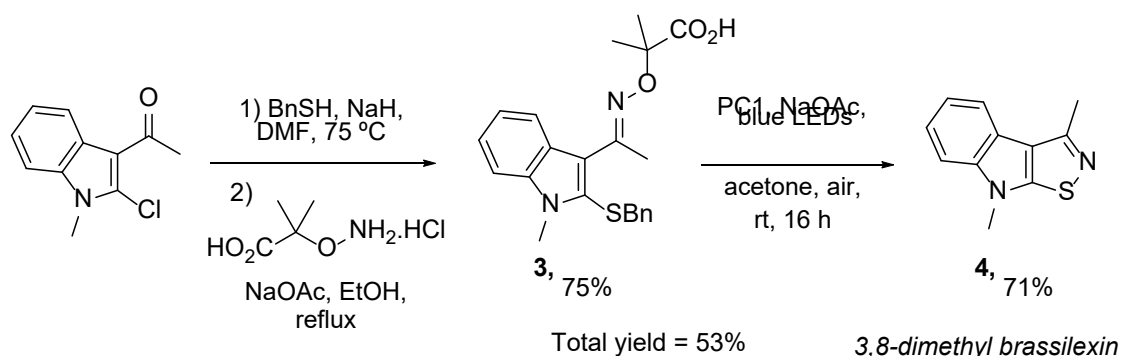

Following the general procedure for the synthesis of sulfides, benzyl mercaptan (0.53 mmol, 0.06 mL, 1.05 equiv) was added dropwise for 0.25 h to a stirred suspension of NaH (60%, 0.6 mmol, 24 mg, 1.2 equiv) in DMF (1.1 mL) at 0 °C (ice bath). Afterwards, a solution of the 3-acetyl-2-chloro-1-methyl-1*H*-indole (0.5 mmol, 103.8 mg, 1 equiv) in DMF (0.25 mL) was added and the reaction was heated to 75 °C for 12 h. After this time, the reaction was cooled to room temperature, diluted with dichloromethane and washed with water (3x) and brine. The organic phase was dried over  $\text{MgSO}_4$  and concentrated under reduced pressure. Then, the solid residue was subjected to flash chromatography (silica gel, cyclohexane/EtOAc) to give the analytically pure product 1-(2-(benzylthio)-1-methyl-1*H*-indol-3-yl)ethan-1-one.

### 1-(2-(benzylthio)-1-methyl-1*H*-indol-3-yl)ethan-1-one (SI-1t)

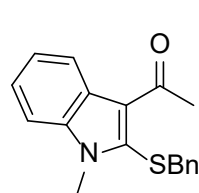

Following procedure, the reaction of 3-acetyl-2-chloro-1-methyl-1*H*-indole (0.5 mmol, 103.8 mg), NaH (60%, 0.6 mmol, 24 mg) and benzyl mercaptan (0.53 mmol, 0.06 mL) in DMF (1.35 mL) at 75 °C afforded the product **SI-1t** (89%, 131.2 mg) as a pale yellow solid.  $^1\text{H NMR}$  (300 MHz,  $\text{CDCl}_3$ )  $\delta$  8.39 – 8.26 (m, 1H), 7.35 – 7.23 (m, 4H), 7.19 (d,  $J = 7.6$  Hz, 2H), 6.99 (d,  $J = 7.6$  Hz, 2H), 4.04 (s, 2H), 3.52 (s, 3H), 2.74 (s, 3H);  $^{13}\text{C}$

**NMR (75 MHz, CDCl<sub>3</sub>)**  $\delta$  194.8, 137.4, 137.1, 135.8, 128.7, 128.6, 127.6, 126.5, 123.9, 122.6, 122.5, 121.4, 109.9, 42.4, 30.6, 28.4.

Following the general procedure for the synthesis of oximes, a solution of 1-(2-(benzylthio)-1-methyl-1*H*-indol-3-yl)ethan-1-one (**SI-1t**, 0.44 mmol, 131.2 mg, 1 equiv) in EtOH (2.2 mL) was treated with 2-(aminoxy)-2-methylpropanoic acid hydrochloride (**SI-11**, 0.53 mmol, 82.2 mg, 1.2 equiv), sodium acetate (1.06 mmol, 86.6 mg, 2.4 equiv) and heated to reflux until completion by TLC analysis. The mixture was then allowed to cool to room temperature and water was added. The resulting aqueous solution was extracted with EtOAc (3x) and the combined organic layers were dried over anhydrous MgSO<sub>4</sub>, filtered and concentrated under vacuum to provide the product. Then, the residue was subjected to flash chromatography (silica gel, cyclohexane/EtOAc) to give the analytically pure product **3**.

**2-(((1-(2-(benzylthio)-1-methyl-1*H*-indol-3-yl)ethylidene)amino)oxy)-2-methylpropanoic acid (**3**)**

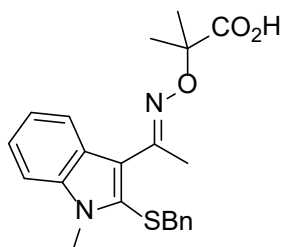

Following the procedure, the reaction of **SI-1t** (0.44 mmol, 131.2 mg), **SI-11** (0.53 mmol, 82.2 mg) and sodium acetate (1.06 mmol, 86.6 mg) in EtOH (2.2 mL) at reflux afforded the product **3** (84%, 145.7 mg) (75% for two steps) as a yellow solid. **<sup>1</sup>H NMR (300 MHz, CDCl<sub>3</sub>)**  $\delta$  7.75 (d, *J* = 8.0 Hz, 1H), 7.32 – 7.11 (m, 6H), 6.95 (dd, *J* = 7.4, 1.8 Hz, 2H), 3.88 (s, 2H), 3.49 (s, 3H), 2.39 (s, 3H), 1.65 (s, 6H); **<sup>13</sup>C NMR (75 MHz, CDCl<sub>3</sub>)**  $\delta$  176.6, 155.8, 137.6, 137.3, 129.7, 128.7, 128.5, 127.4, 125.5, 123.5, 121.0, 120.5, 118.3, 110.0, 81.5, 42.6, 29.8, 24.6, 16.4; **HRMS** *m/z* (ESI): calcd. for C<sub>22</sub>H<sub>23</sub>N<sub>2</sub>O<sub>3</sub>S (M-H)<sup>-</sup> 395.1435, found 395.1241.

Following the general procedure for the synthesis of isothiazoles, in an oven-dried glass vial equipped with a stirring bar, **3** (0.1 mmol, 39.6 mg, 1 equiv), NaOAc (0.1 mmol, 8.2 mg, 1 equiv), photocatalyst **PC1**, 9-mesityl-10-methyl acridinium perchlorate, (5·10<sup>-3</sup> mmol, 2.1 mg, 0.05 equiv) and acetone (1.33 mL) were added under air. Then, the vial was closed with a PTFE/rubber septum perforated several

times to enable the air enter into the reaction. Afterwards, the mixture was stirred and irradiated at 450 nm using 380 mW single LEDs in a custom-made temperature-controlled system (see Figure S1) for 16h at 20 °C. Then, the volatiles were removed and the analytically pure product **4** was obtained by flash chromatography (Iatrobeds silica gel; cyclohexane/EtOAc).

### 3,8-dimethyl-8H-isothiazolo[5,4-*b*]indole (**4**)

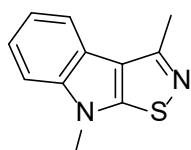

Following the procedure, the reaction of **3** (0.1 mmol, 39.6 mg), NaOAc (0.1 mmol, 8.2 mg) and photocatalyst **PC1** (5 mol%, 2.1 mg) in acetone (1.33 mL) irradiated at 450 nm afforded the product **4** (71%, 14.4 mg) as a white solid. **<sup>1</sup>H NMR (300 MHz, (CD<sub>3</sub>)<sub>2</sub>CO)** δ 7.90 (d, *J* = 7.8 Hz, 1H), 7.53 (d, *J* = 8.2 Hz, 1H), 7.36 (ddd, *J* = 8.2, 7.8, 1.3 Hz, 1H), 7.30 – 7.18 (m, 1H), 3.94 (s, 3H), 2.72 (d, *J* = 1.3 Hz, 3H); **<sup>13</sup>C NMR (126 MHz, (CD<sub>3</sub>)<sub>2</sub>CO)** δ 161.4, 157.3, 144.7, 123.9, 123.0, 120.7, 120.2, 118.9, 109.8, 32.2, 17.9; **HRMS** *m/z* (ESI): calcd. for C<sub>11</sub>H<sub>10</sub>N<sub>2</sub>S (M+H)<sup>+</sup> 202.0565, found 202.0559.

## 7. Flow Setup for the Synthesis of Isothiazoles **2**

*General procedure for the optimization of the reaction conditions for the flow setup:*

In a coil (*V* = 18 mL) made of perfluoroalkoxy (PFA) tubing (i.d. = 1.6 mm) irradiated with a blue LED spot (40 W), 2-(((1-(2-(benzylthio)phenyl)ethylidene)amino)oxy)-2-methylpropanoic acid (**1d**, 0.15 mmol, 36.3 mg, 1 equiv), NaOAc (0.15 mmol, 12.3 mg, 1 equiv), photocatalyst **PC1**, 9-mesityl-10-methyl acridinium perchlorate and acetone (2 mL) were injected at 20 °C. Then, the volatiles were removed and yield was determined by <sup>1</sup>H-NMR analysis using nitromethane (8 μL, 0.15 mmol) as the internal standard. O<sub>2</sub> gas was employed in a segmented flow fashion and a BPR (1.6 bar) was added at the end of the coil to increase the pressure of the system.

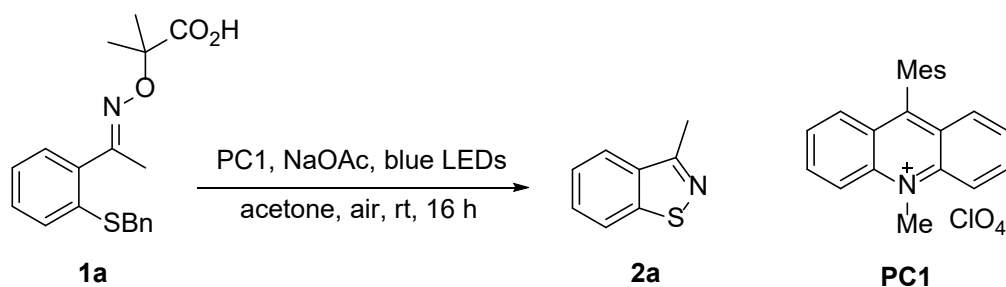

**Table S3.** Optimization of reaction conditions for the flow setup.

| entry    | conditions <sup>[a]</sup>                            | PC1 (mol%) | $t_R$ (min) | conv. (%) <sup>[b]</sup> | yield (%) <sup>[b]</sup> |
|----------|------------------------------------------------------|------------|-------------|--------------------------|--------------------------|
| 1        | No oxygen                                            | 10         | 80          | 50                       | 13                       |
| 2        | Acetone sat.<br>with O <sub>2</sub><br>BPR (1.6 bar) | 10         | 80          | 68                       | 41                       |
| 3        | O <sub>2</sub>                                       | 10         | 80          | 84                       | 47                       |
| 4        | O <sub>2</sub>                                       | 10         | 180         | 88                       | 48                       |
| 5        | O <sub>2</sub><br>BPR (1.6 bar)                      | 10         | 80          | 100                      | 26                       |
| <b>6</b> | <b>O<sub>2</sub></b>                                 | <b>5</b>   | <b>60</b>   | <b>82</b>                | <b>47</b>                |

<sup>[a]</sup> Segmented flow (2 mm slugs) was made by passing oxygen gas and reaction solution through a T-union (1.25 mm thru-hole; 17.5  $\mu\text{L}$  swept volume). <sup>[b]</sup> The yield was determined from the crude <sup>1</sup>H-NMR. BPR = black pressure regulator

*General procedure for the synthesis of isothiazoles 2 in the flow setup:*

The corresponding oxime derivative **1** (0.33 mmol, 1 equiv), photocatalyst **PC1**, 9-mesityl-10-methyl acridinium perchlorate (0.017 mmol, 6.8 mg, 0.05 equiv) and acetone (4.4 mL) were mixed at 20 °C and passed through a packed bed reactor filled with NaOAc (Figure S2a). Afterwards, reaction solution and O<sub>2</sub> gas, used in a segmented flow fashion, were mixed through a T-union (Figure S2b), controlling the gas slugs (2 mm) with a micrometric valve. Compounds **1b**, **1c** and **1g** were injected consecutively (separated by 4 mL of acetone) in the coil (V = 18 mL) made of perfluoroalkoxy (PFA) tubing (i.d. = 1.6 mm) and irradiated with a blue LED spot (40 W) (Figure S3). After 2 h, isothiazoles **2** were collected in different vials. Then, the volatiles were removed and yield was determined by <sup>1</sup>H-NMR analysis using

nitromethane (17.7  $\mu\text{L}$ , 0.33 mmol) as the internal standard: **2b** (55%; 0.18 mmol), **2c** (58%; 0.19 mmol) and **2g** (44%; 0.14 mmol). In all the transformations the throughput of the reaction is  $\approx 140$  times higher than in conventional conditions and around 15% of starting material is recovered in all the cases.

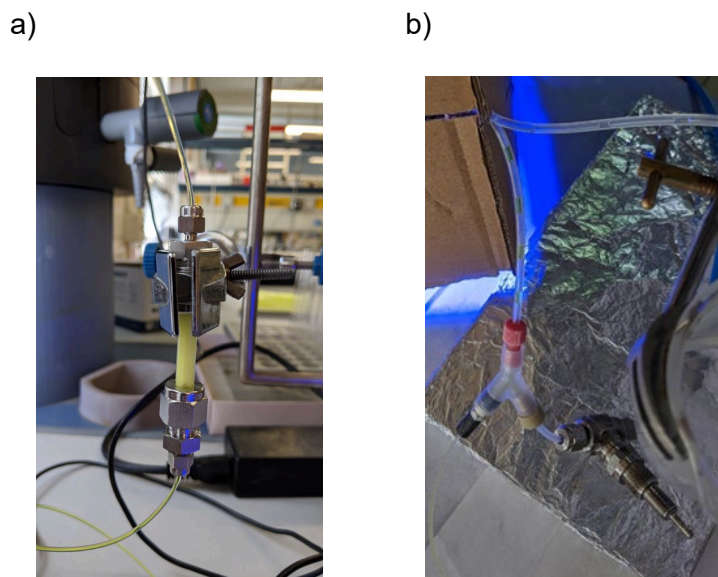

**Figure S2.** a) Packed bed reactor filled with NaOAc and b) T-union with a micrometric valve employed in flow setup.

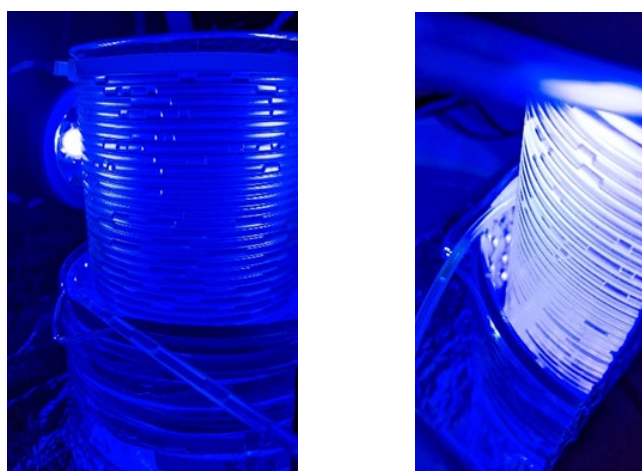

**Figure S3.** Coil of PFA with liquid and gas slugs employed in flow setup.

## 8. Mechanistic Studies

### 8.1. Cyclic Voltammetry of $\alpha$ -Imino-oxy Acids **1**

Electrochemical studies of substrates **1a-d**, **1a'** and **1a''** were performed employing

1 nM solution of the corresponding  $\alpha$ -imino-oxy acid **1** freshly prepared in HPLC grade acetone along with 1 nM sodium acetate and 0.1 M supporting electrolyte (tetrabutylammonium hexafluorophosphate) solutions. Nitrogen was passed through each sample before measurements to avoid the influence of oxygen reduction.

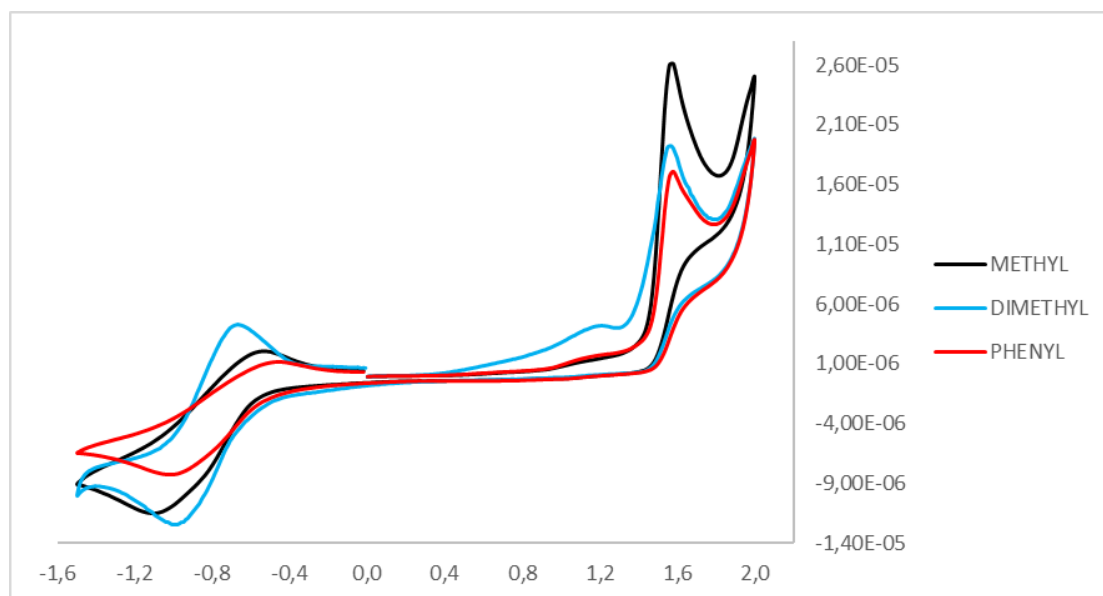

**Figure S4.** Cyclic voltammetry of  $\alpha$ -imino-oxy acids **1a**, **1a'** and **1a''**.

**Table S4.** Oxidation potentials of  $\alpha$ -imino-oxy acids **1a**, **1a'** and **1a''**.

| $\alpha$ -Imino-oxy acids                                                                              | $E_{1/2}^{ox}$ (V) vs SCE |
|--------------------------------------------------------------------------------------------------------|---------------------------|
| 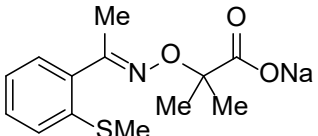 <p><b>1a</b></p>   | +1.58                     |
|  <p><b>1a'</b></p>  | +1.58                     |
|  <p><b>1a''</b></p> | +1.58                     |



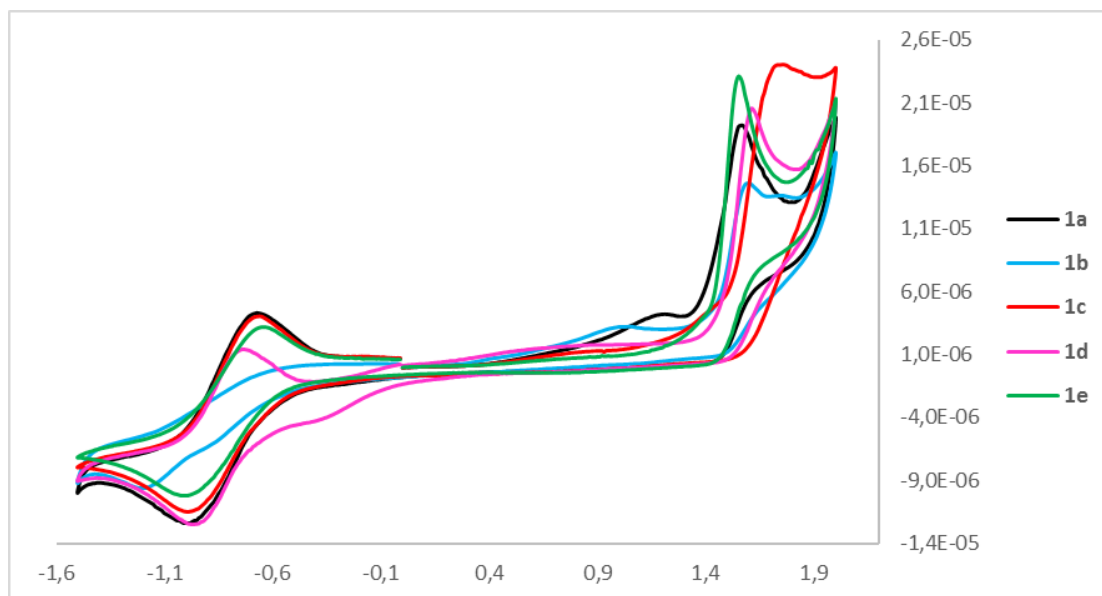

**Figure S5.** Cyclic voltammetry of  $\alpha$ -imino-oxy acids **1a-d**.

**Table S5.** Oxidation potentials of  $\alpha$ -imino-oxy acids **1a-d**.

| $\alpha$ -Imino-oxy acids                                                                            | $E_{1/2}^{ox}$ (V) vs SCE |
|------------------------------------------------------------------------------------------------------|---------------------------|
| 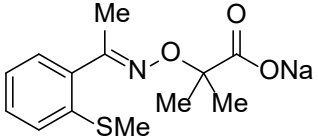 <p><b>1a</b></p> | +1.56                     |
|  <p><b>1b</b></p> | +1.58                     |
|  <p><b>1c</b></p> | +1.72                     |
|  <p><b>1d</b></p> | +1.62                     |

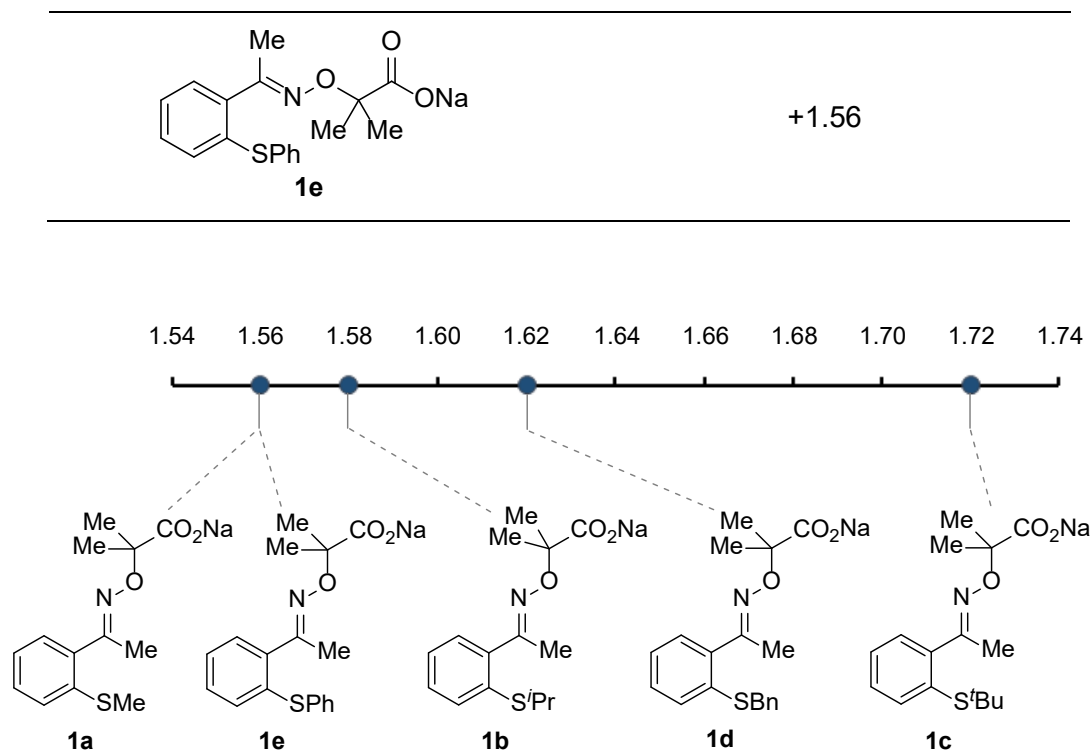

**Figure S6.** Electrochemical scale of  $\alpha$ -imino-oxy acids **1a-d**.

## 8.2. Fluorescence Quenching Studies

Emission intensities and time resolved emission spectra were recorded using an Edinburg Instruments FS5 Spectrofluorometer, and a 450 nm EPL laser.

For the steady-state and time resolved fluorescence quenching studies, increasing concentrations of quencher were added to a solution 3,7 mM of **PC1** in acetone ( $\lambda_{\text{exc}} = 450 \text{ nm}$ ).

a)

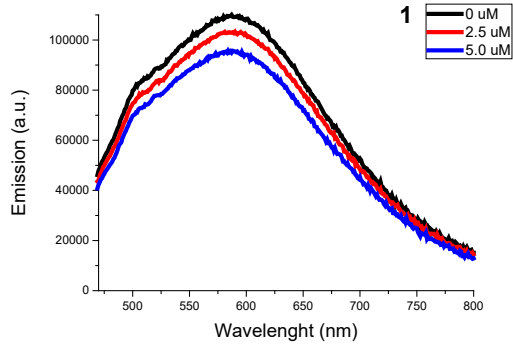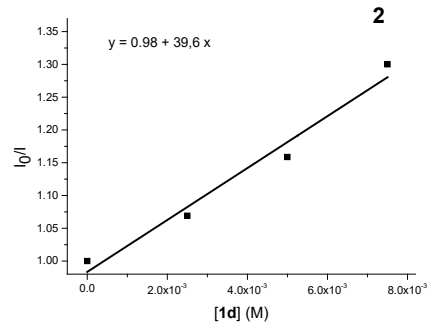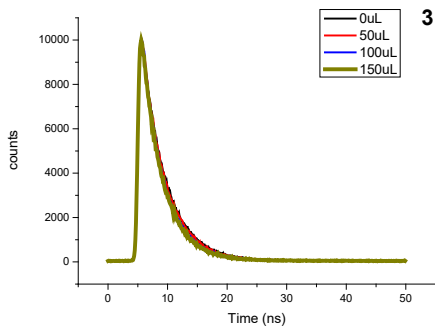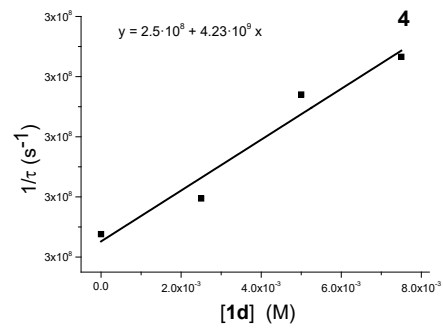

$$Kq = 4.2 \times 10^9 \text{ M}^{-1} \text{ s}^{-1}$$

b)

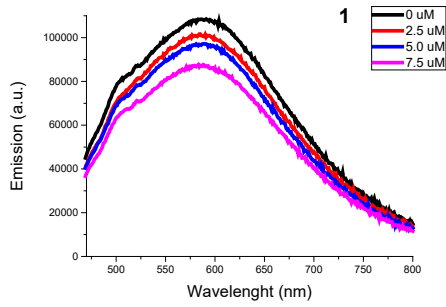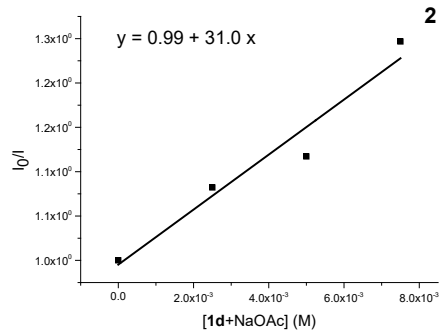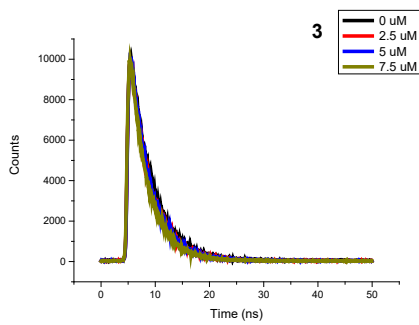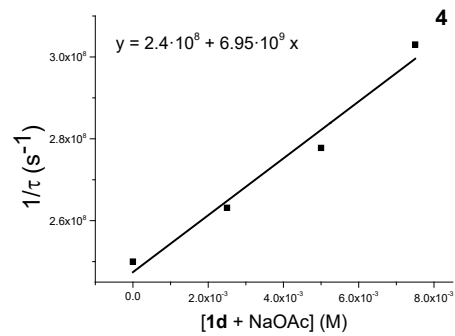

$$Kq = 6.95 \times 10^9 \text{ M}^{-1} \text{ s}^{-1}$$

c)

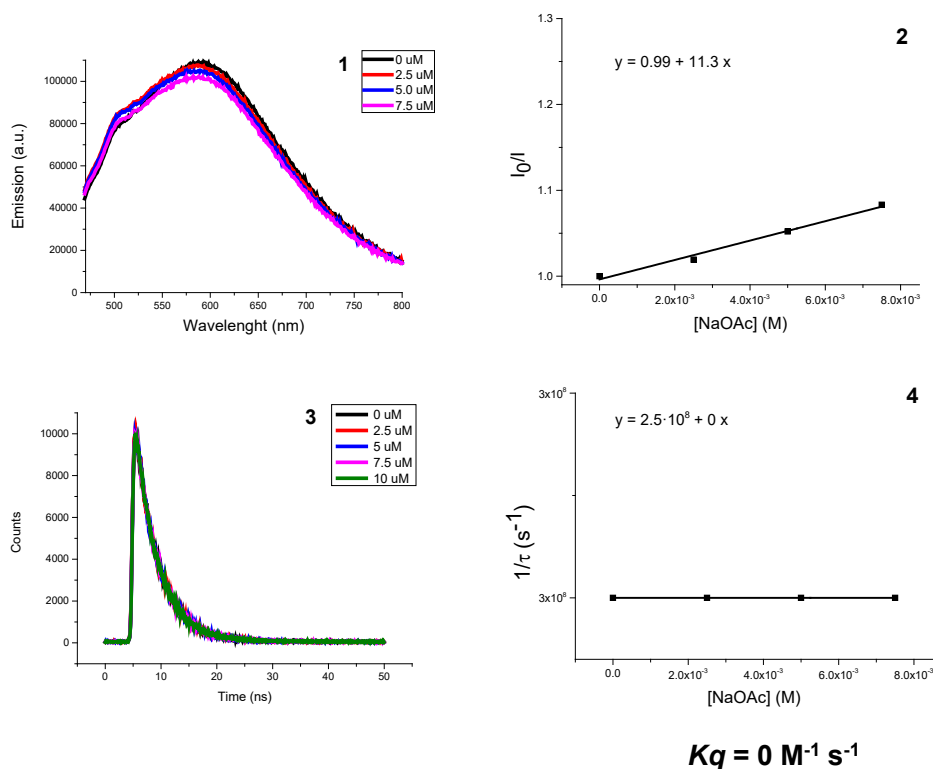

**Figure S7.** Fluorescence quenching studies. a) Quenching studies of **PC1** with **1d**: (1) Steady state luminescence quenching spectrum and (2) Stern-Volmer plot of the steady state; (3) Time resolved luminescence quenching and (4) Stern-Volmer plot to obtain  $Kq$ ; b) Quenching studies of **PC1** with **1d + NaOAc**: (1) Steady state luminescence quenching spectrum and (2) Stern-Volmer plot of the steady state; (3) Time resolved luminescence quenching and (4) Stern-Volmer plot to obtain  $Kq$ ; c) Quenching studies of **PC1** with **NaOAc**: (1) Steady state luminescence quenching spectrum and (2) Stern-Volmer plot of the steady state; (3) Time resolved luminescence quenching and (4) Stern-Volmer plot to obtain  $Kq$ .

### 8.3. Radical Trapping Experiments

**Table S6.** Radical Trapping Experiments.

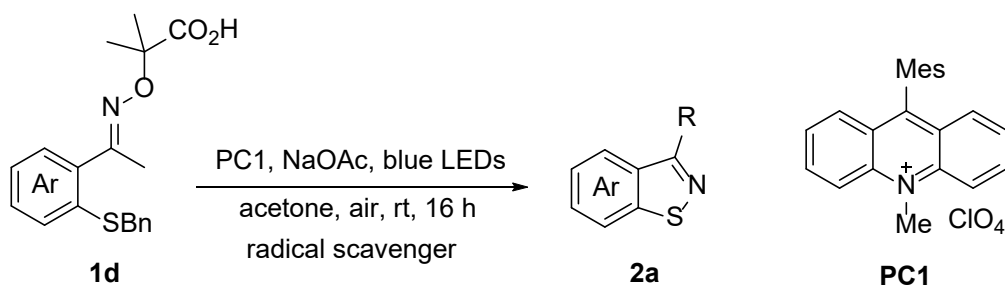

| entry | Radical scavenger | yield (%) <sup>[a]</sup> |
|-------|-------------------|--------------------------|
| 1     | None              | 85                       |
| 2     | TEMPO             | 33                       |
| 3     | BHT               | 39                       |

<sup>[a]</sup> The yield was determined from the crude <sup>1</sup>H-NMR.

Following the general procedure for the synthesis of isothiazoles **2**, in an oven-dried glass vial equipped with a stirring bar, 2-methyl-2-(((1-(2-(methylthio)phenyl)ethylidene)amino)oxy)propanoic acid (**1a**, 0.05 mmol, 13.4 mg, 1 equiv), the NaOAc (0.05 mmol, 4.1 mg, 1 equiv), photocatalyst **PC1**, 9-mesityl-10-methyl acridinium perchlorate, ( $2.5 \cdot 10^{-3}$  mmol, 1 mg, 0.05 equiv), the corresponding radical scavenger (0.25 mmol, 5 equiv) and acetone (0.67 mL) were added under air. Then, the vial was closed with a PTFE/rubber septum perforated several times to enable the air enter into the reaction. Afterwards, the mixture was stirred and irradiated at 450 nm using 380 mW single LEDs in a custom-made temperature-controlled system (see Figure S1) for 16h at 20 °C. Then, the volatiles were removed and yield was determined by <sup>1</sup>H-NMR analysis using 1,3,5-trimethoxybenzene (8.4 mg, 0.05 mmol) as internal standard.

## 9. References

- [1] G. R. Fulmer, A. J. M. Miller, N. H. Sherden, H. E. Gottlieb, A. Nudelman, B. M. Stoltz, J. E. Bercaw and K. I. Goldberg, *Organometallics*, 2010, **29**, 2176.
- [2] (a) Y. Wang and M. Gu, *Anal. Chem.*, 2010, 82, 7055; (b) Y. Wang, *Methods for Operating MS Instrument Systems*, United States Patent No. 6,983,213, 2006; (c) N. Ochiaiaia, K. Sasamoto, K. MacNamara, *Journal of Chromatography A*, 2012, **1270**, 296; (d) H.-P. Ho, R.-Y. Lee, C.-Y. Chen, S.-R. Wang, Z.-G. Li and M.-R. Lee, *Rapid Commun. Mass Spectrom.*, 2011, **25**, 25.
- [3] K. O. Hessian and B. L. Flynn, *Org. Lett.*, 2003, **5**, 4377.
- [4] L. C. Schmidt, V. Rey and A B. Peñeñory, *Eur. J. Org. Chem.*, 2006, 2210.
- [5] J. L. Krinsky, J. Arnold and R. G. Bergman, *Organometallics*, 2007, **26**, 897.
- [6] I. Sorribes and A. Corma, *Chem. Sci.*, 2019, **10**, 3130.
- [7] R. Sikari, S. Sinha, S. Das, A. Saha, G. Chakraborty, R. Mondal and N. D. Paul, *J. Org. Chem.*, 2019, **84**, 4072.

- [8] X. Kou, Y. Li, L. Wu, X. Zhang, G. Yang and W. Zhang, *Org. Lett.*, 2015, **17**, 5566.
- [9] X. Chang, P.-L. Ma, H.-C. Chen, C.-Y. Li and P. Wang, *Angew. Chem. Int. Ed.*, 2020, **59**, DOI: 10.1002/anie.202002289
- [10] R. J. Faggyas, E. D. D. Calder, C. Wilson and A. Sutherland *J. Org. Chem.*, 2017, **82**, 11585.
- [11] M. Bouhedja, B. Peres, W. Fhayli, Z. Ghandour, A. Boumendjel, G. Faury and S. Khelili, *European Journal of Medicinal Chemistry*, 2018, **114**, 774.
- [12] (a) S. P. Hollinshead, J. B. Nichols and J. W. Wilson, *J. Org. Chem.*, 1994, **59**, 6703; (b) M. G. Charest, D. R. Siegel and A. G. Myers, *J. Am. Chem. Soc.*, 2005, **127**, 8292.
- [13] A. Mueller and K. Y. Amsharov, *Eur. J. Org. Chem.*, 2012, 6155.
- [14] S. C. Pelly, C. J. Parkinson, W. A. L. van Otterlo and C. B. de Koning, *J. Org. Chem.*, 2005, **70**, 10474.
- [15] A. Couture, P. Grandclaude and E. Huguerre, *E. Synthesis*, 1989, **6**, 456.
- [16] L. A. Crawford and H. McNab, *Collect. Czech. Chem. Commun.*, 2009, **74**, 995.
- [17] L. H. Andrade, A. V. Silva, P. Milani, D. Koszelewski and W. Kroutil, *Org. Biomol. Chem.*, 2010, **8**, 2043.
- [18] F. Le Vaillant, M. Garreau, S. Nicolai, G. Gryn'ova, C. Corminboeuf and J. Waser, *Chem. Sci.*, 2018, **9**, 5883.
- [19] H. Jiang and A. Studer, *Angew. Chem. Int. Ed.*, 2017, **56**, 12273.
- [20] N. O. Devarie-Baez and M. Xian, *Org. Lett.*, 2010, **12**, 752.
- [21] T. Dvorak, L.-M. Rečnik, M. Schnürch, K. Mereiter, M. D. Mihovilovic and P. Stanetty, *Arkivoc*, 2013, **3**, 245.
- [22] H. Ankati and E. R. Biehl, *Heterocycles*, 2010, **80**, 1291.
- [23] M. S. C. Pedras and M. Suchy, *Bioorg. Med. Chem.*, 2006, **14**, 714.

## 10. NMR Spectra

### 10.1. NMR Spectra of Sulfides SI-1

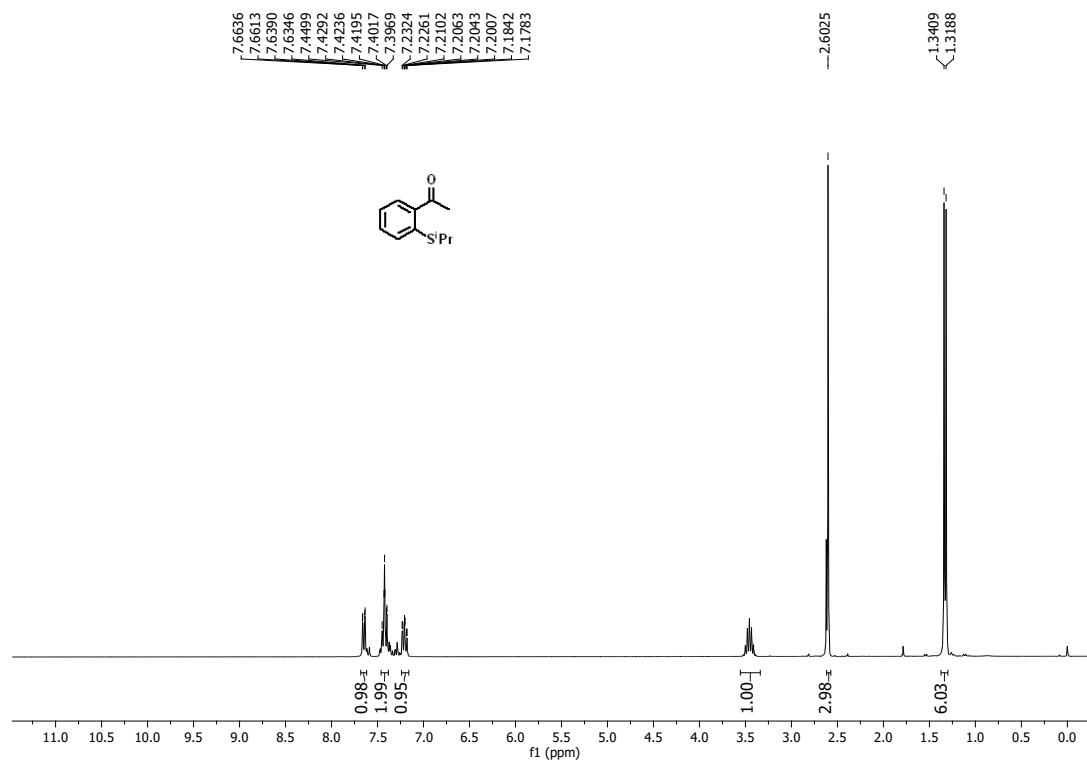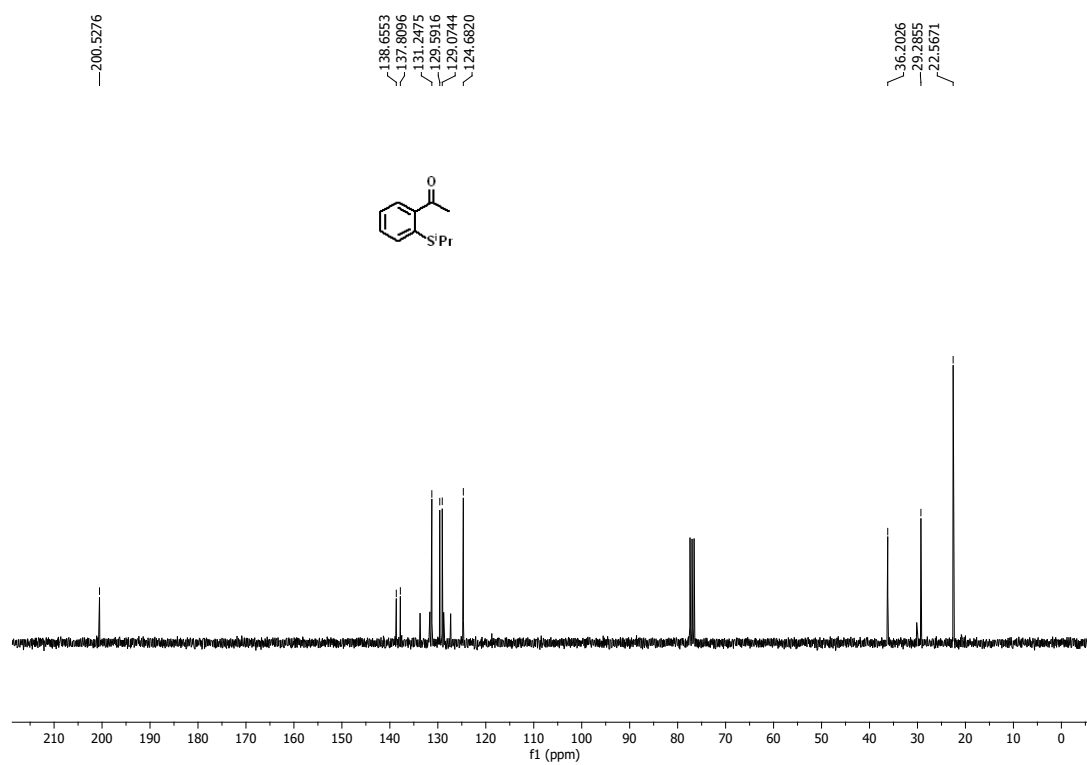

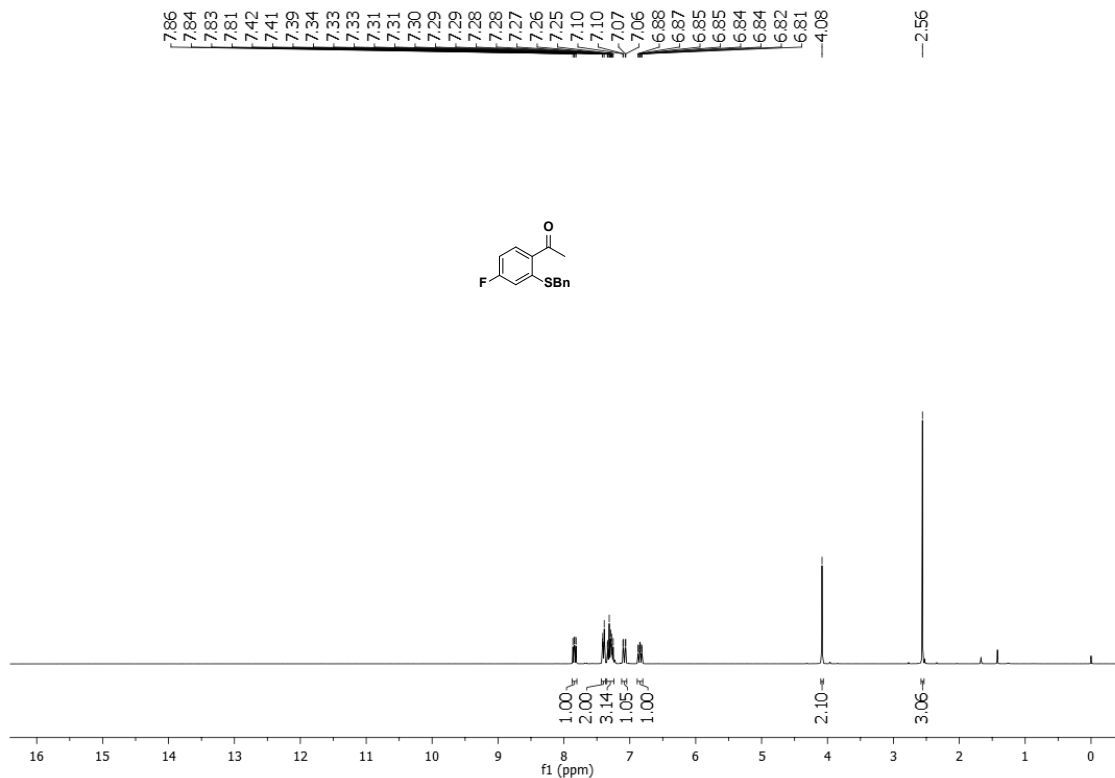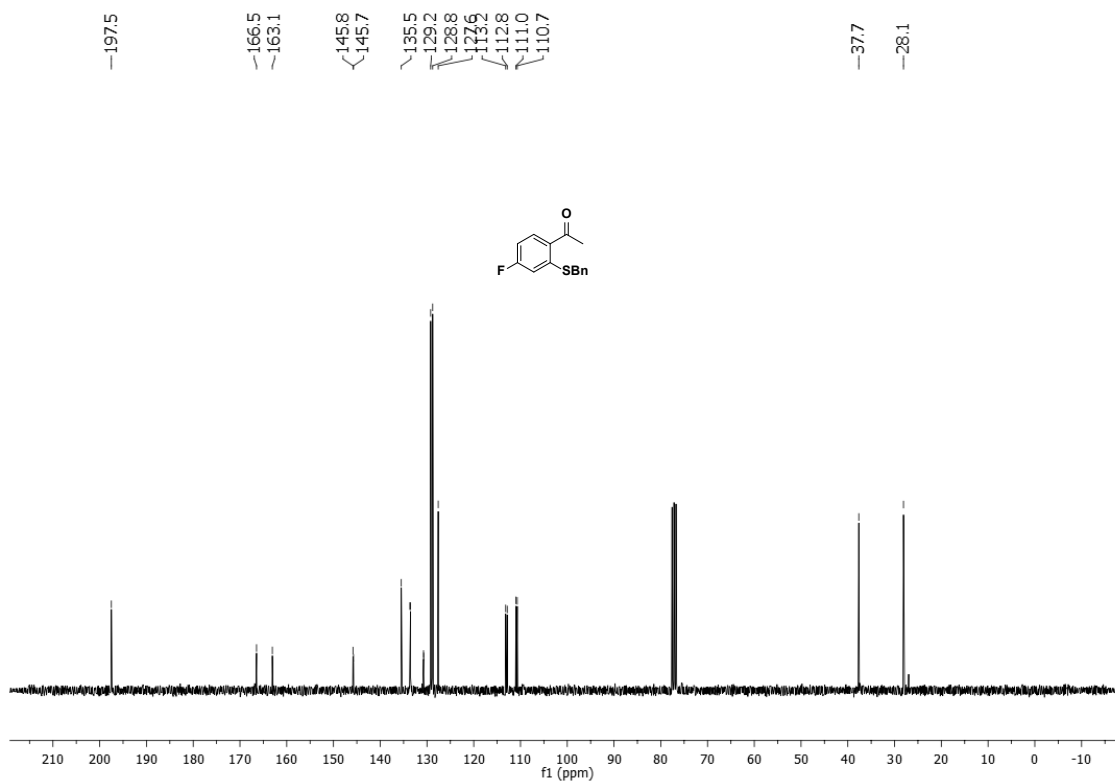



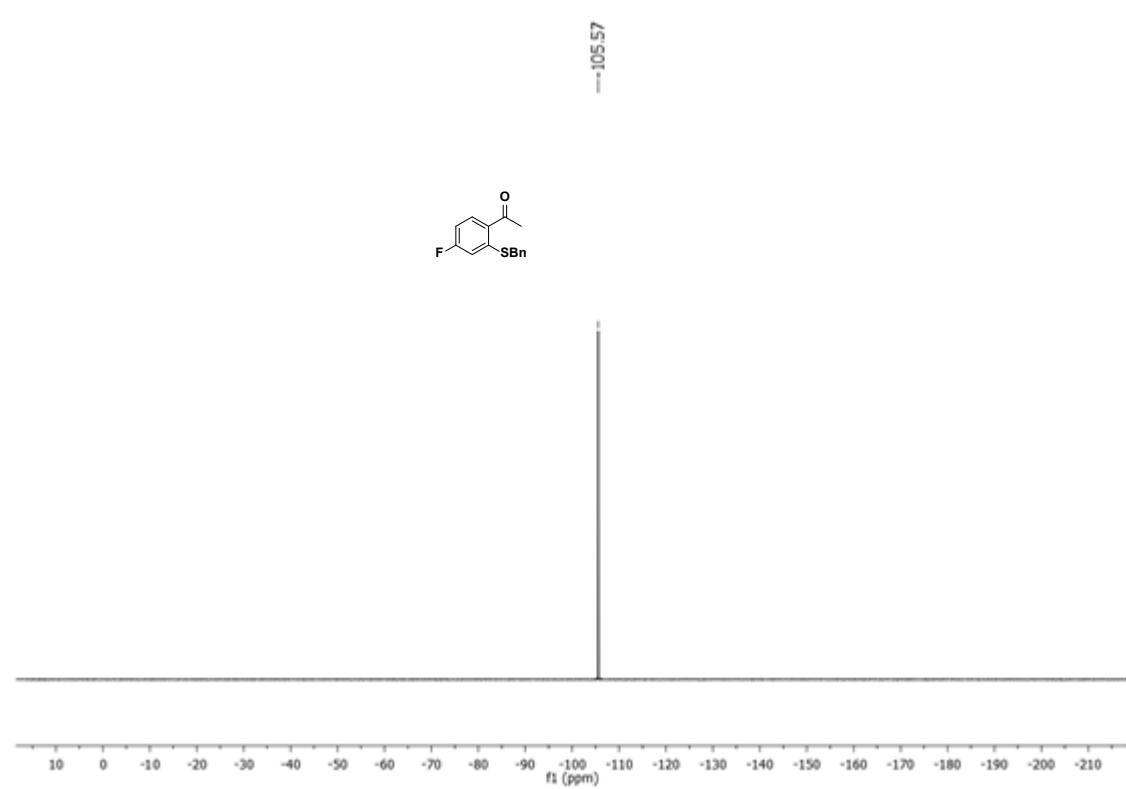

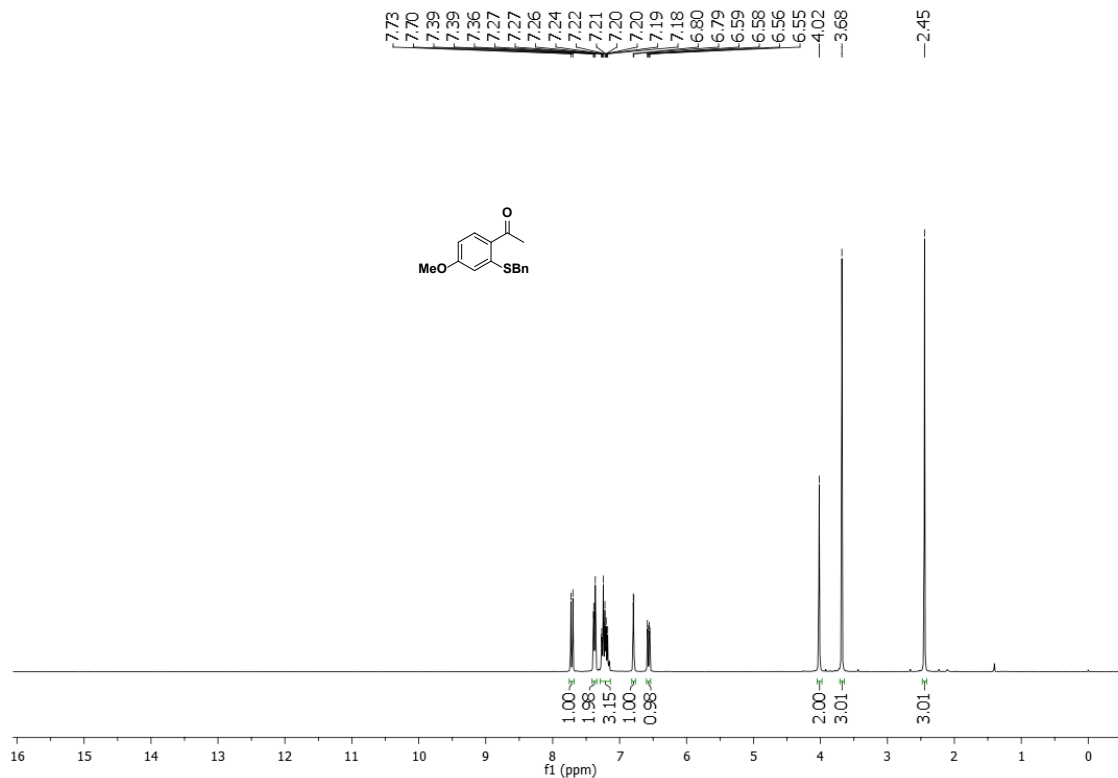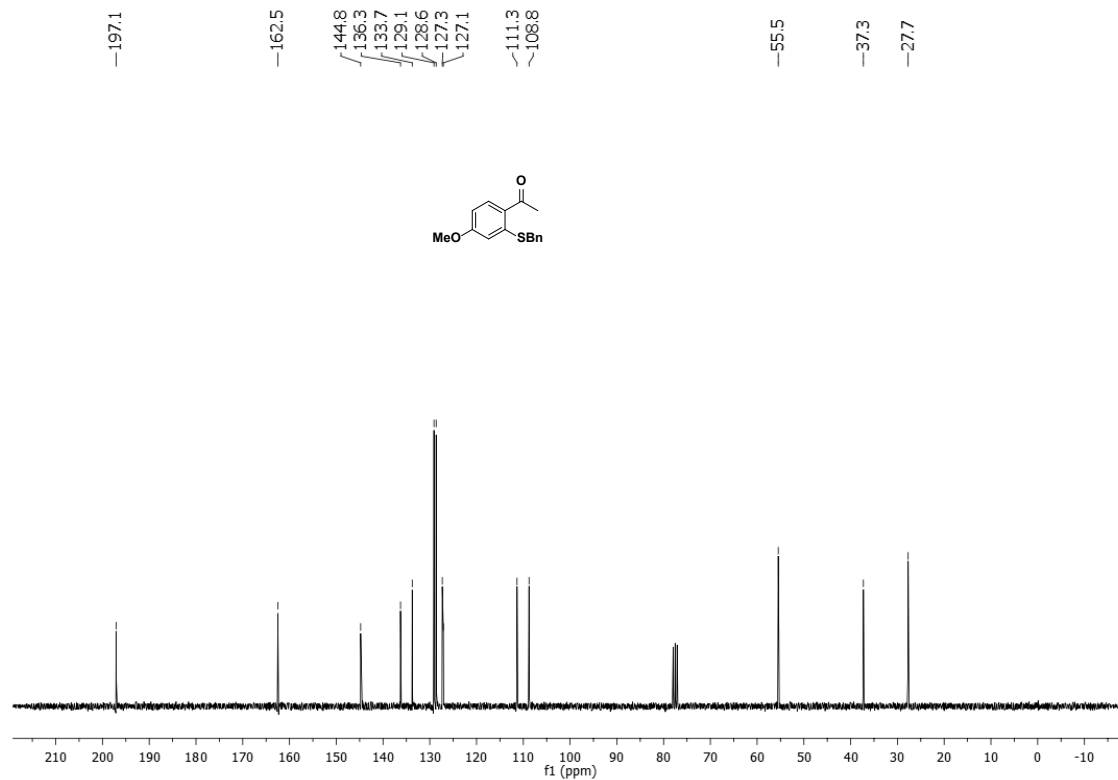

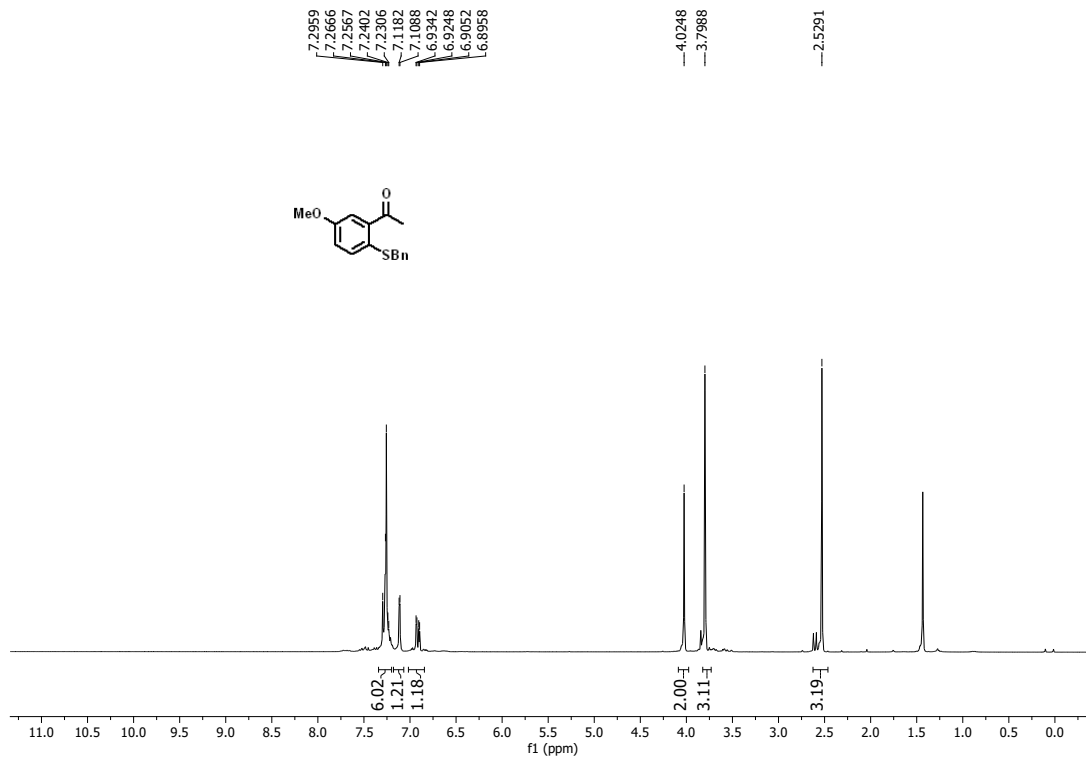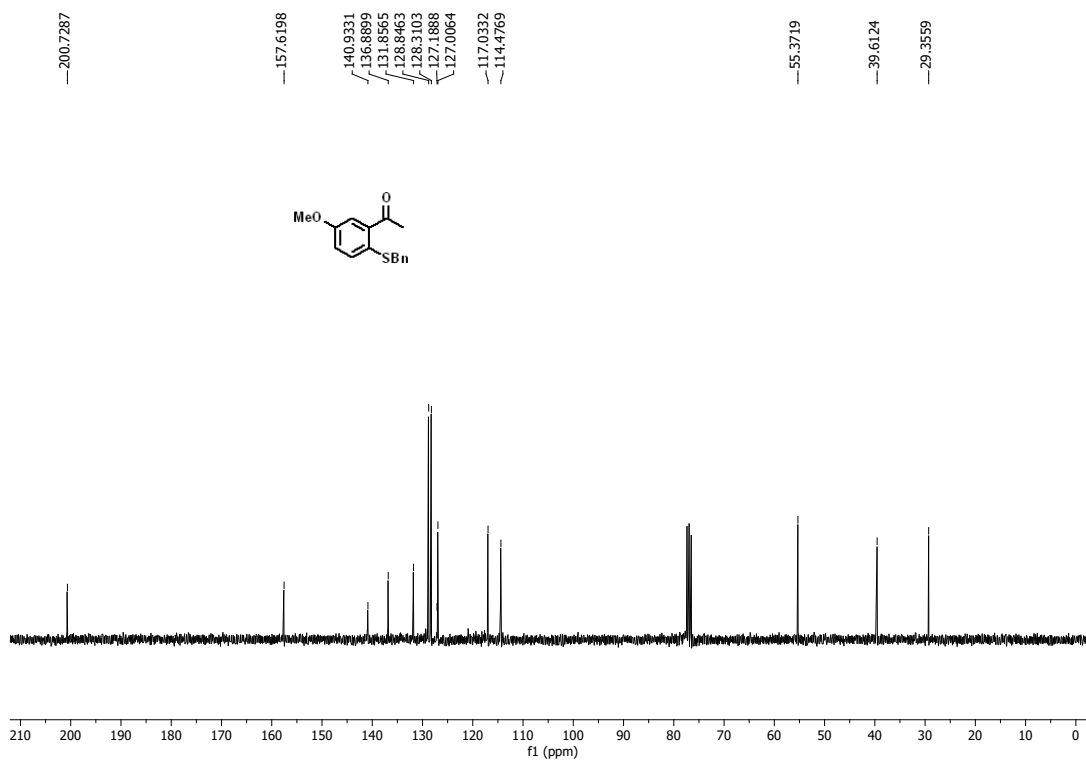

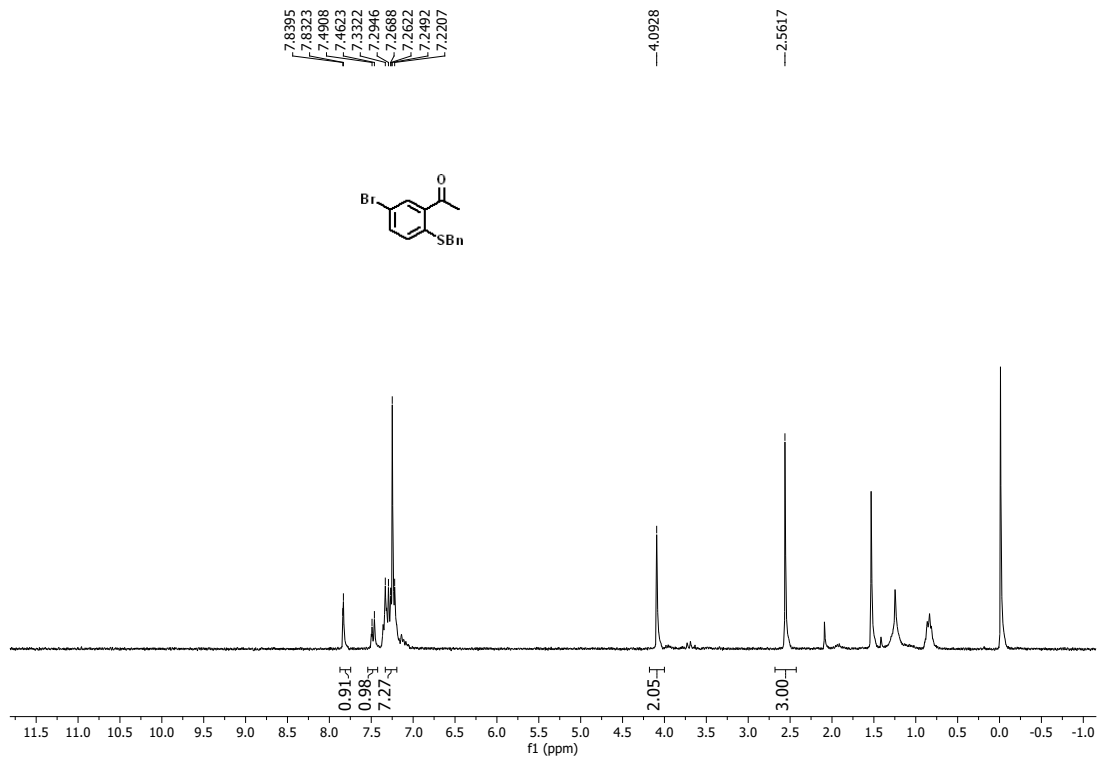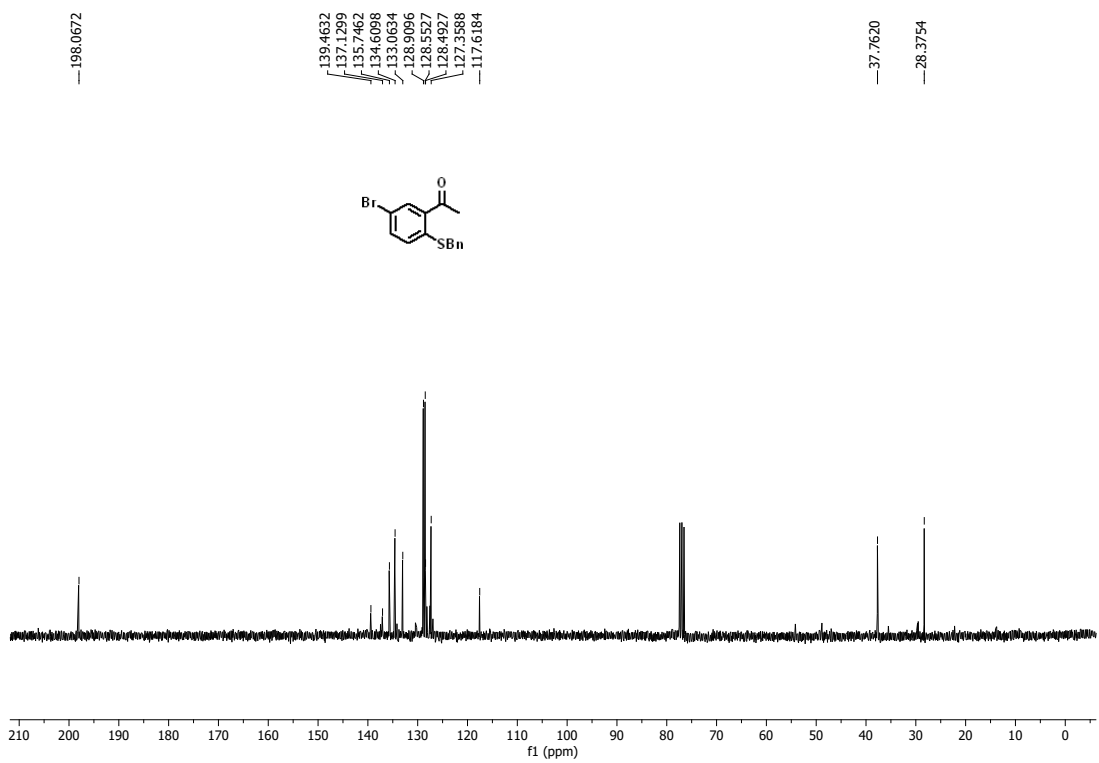

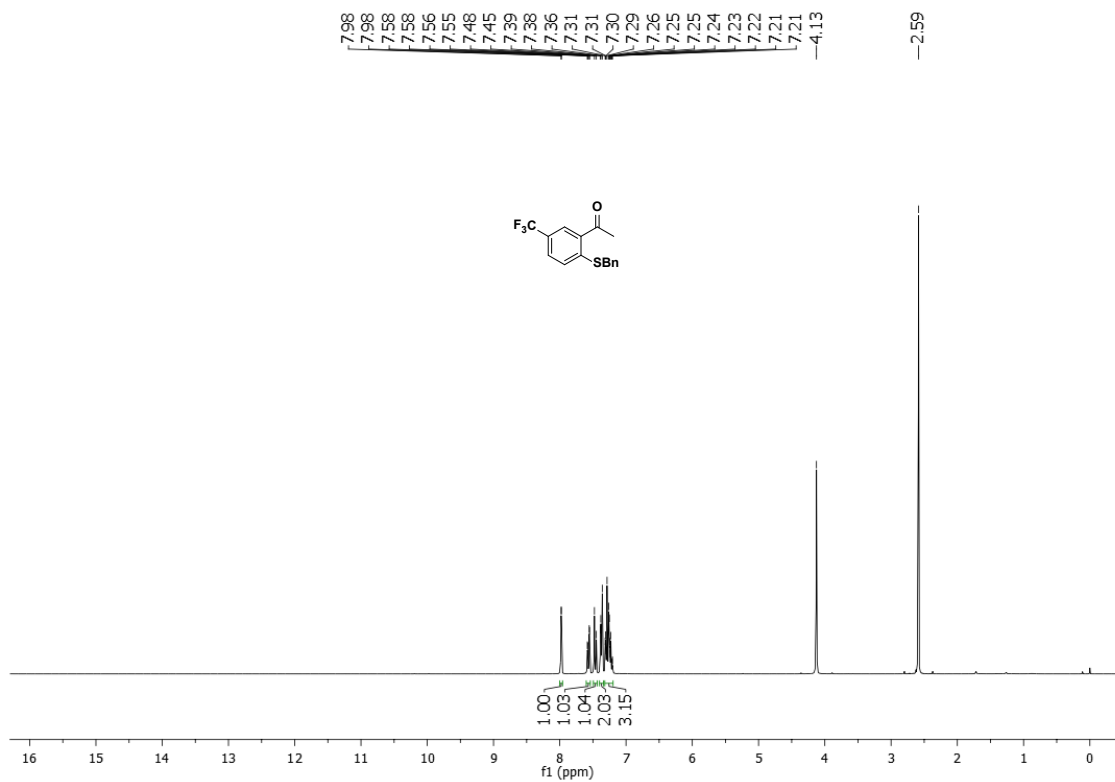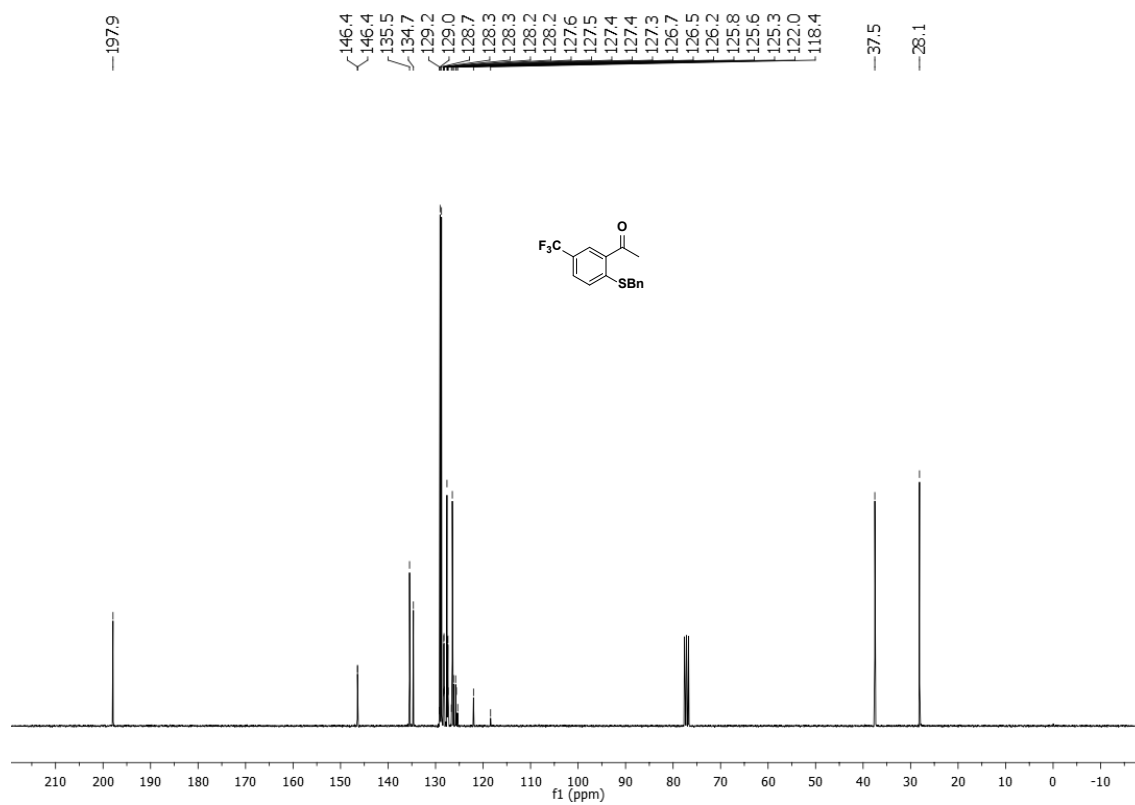

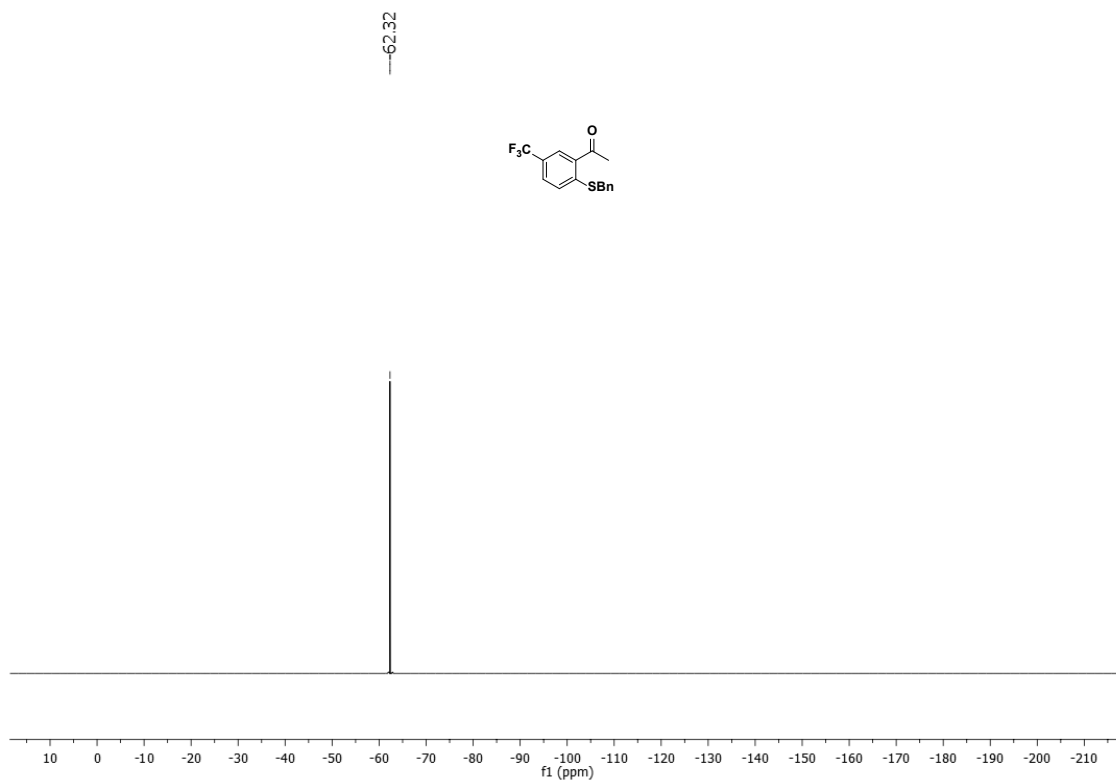

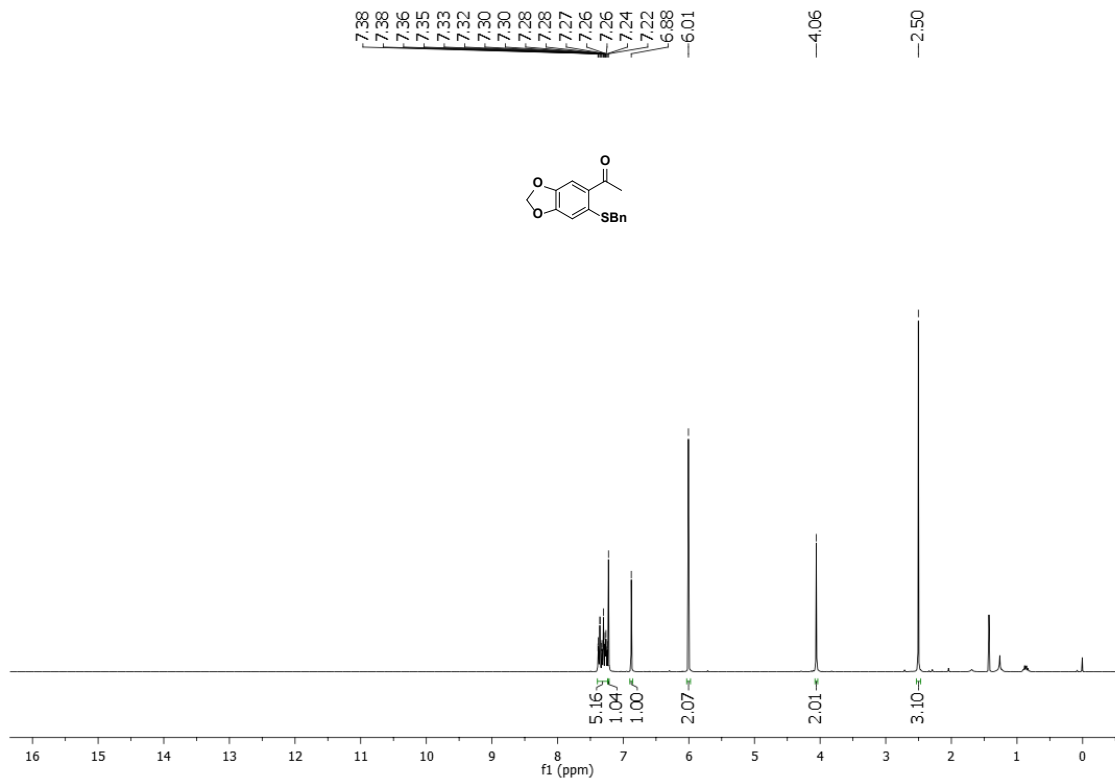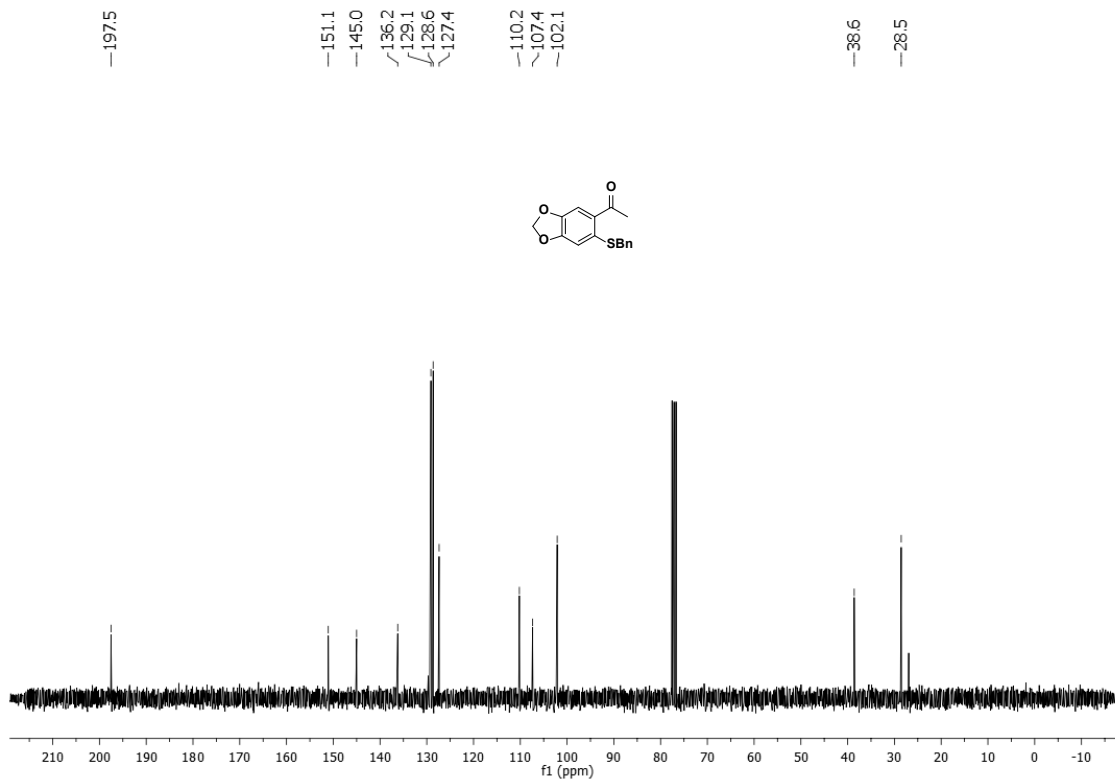

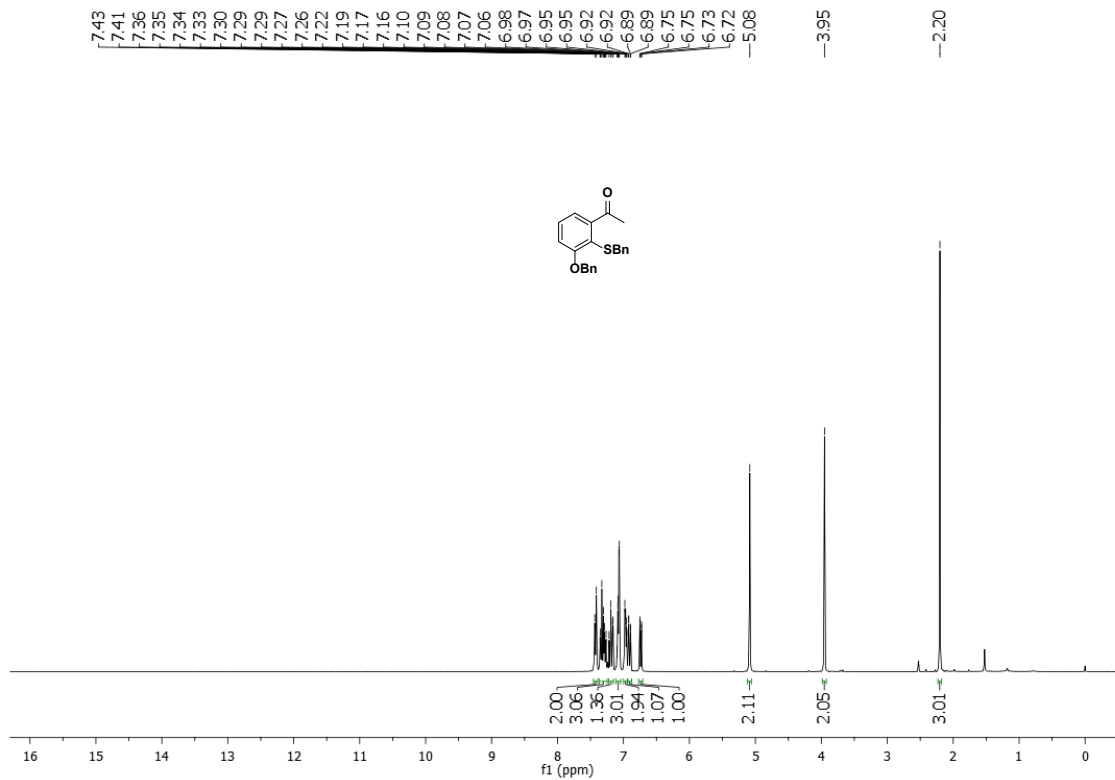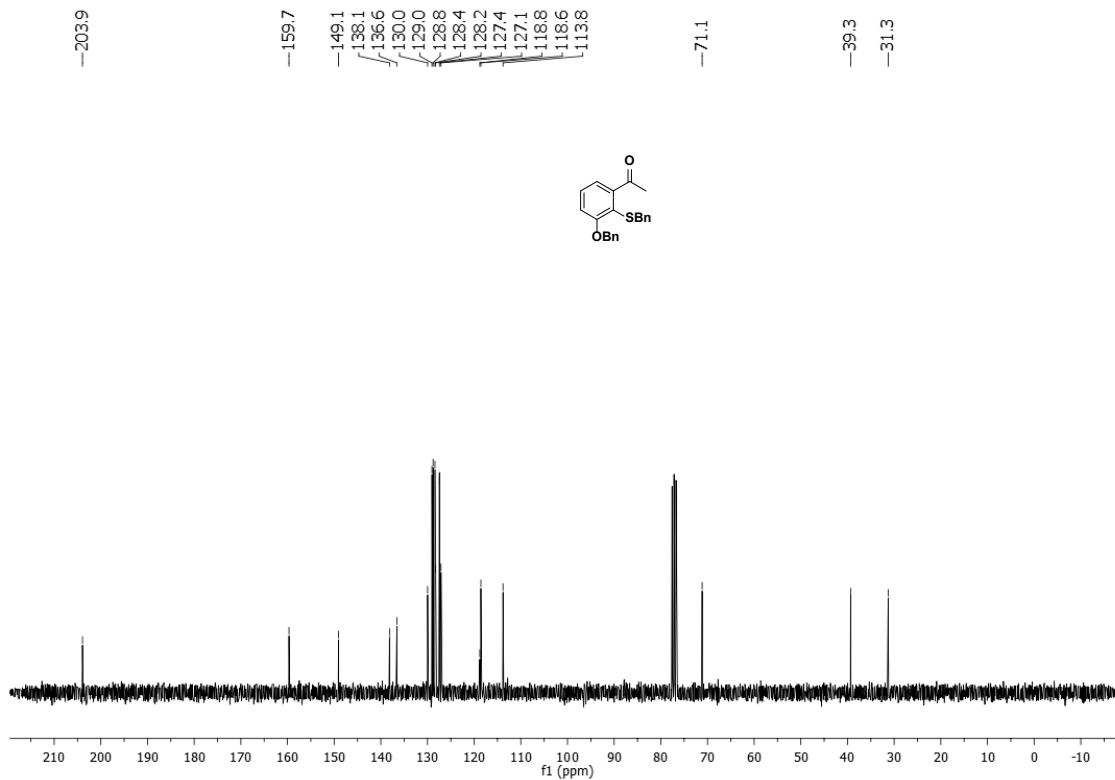



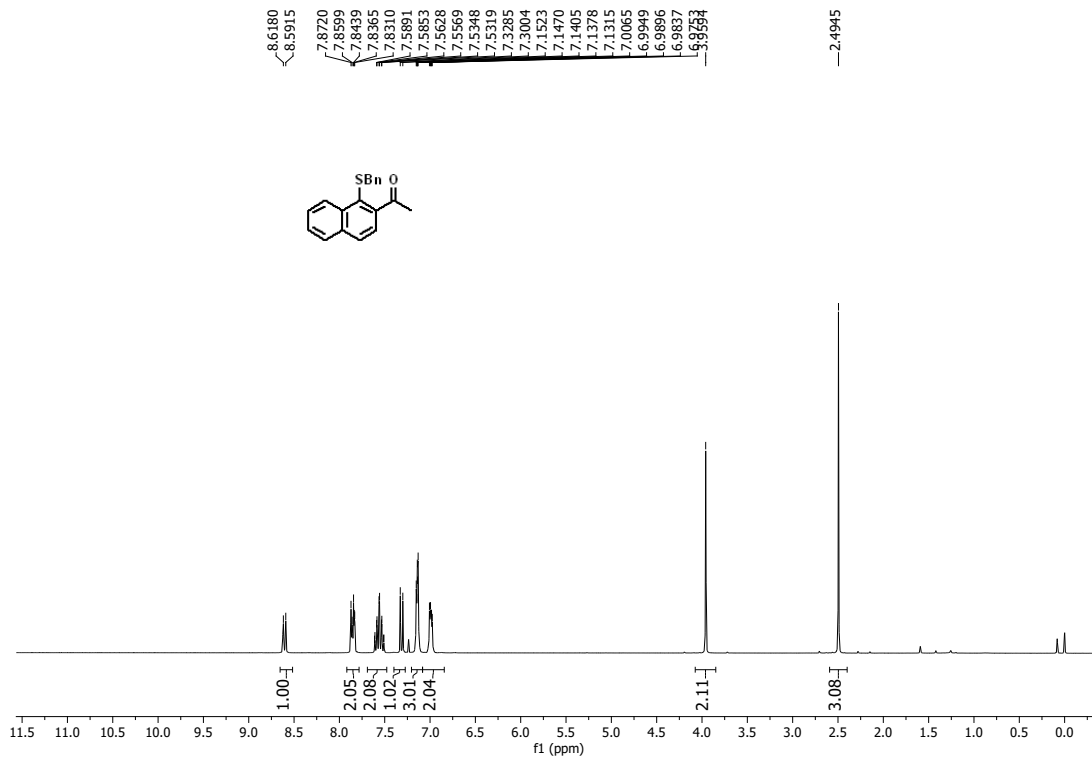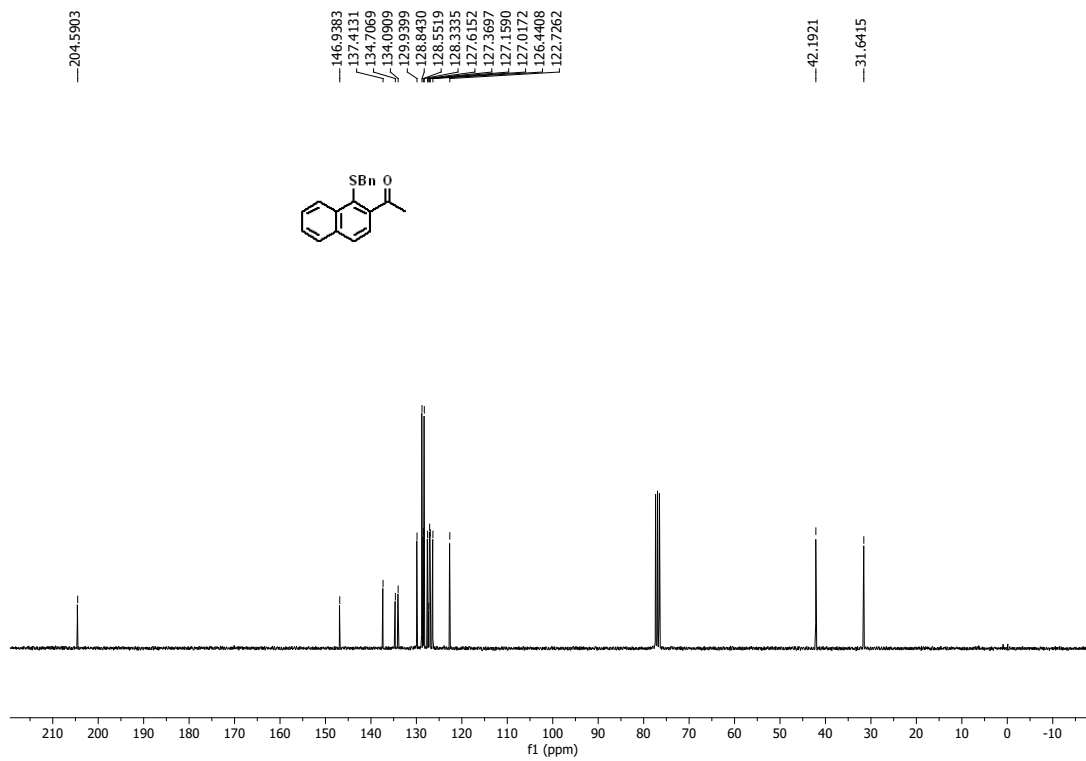

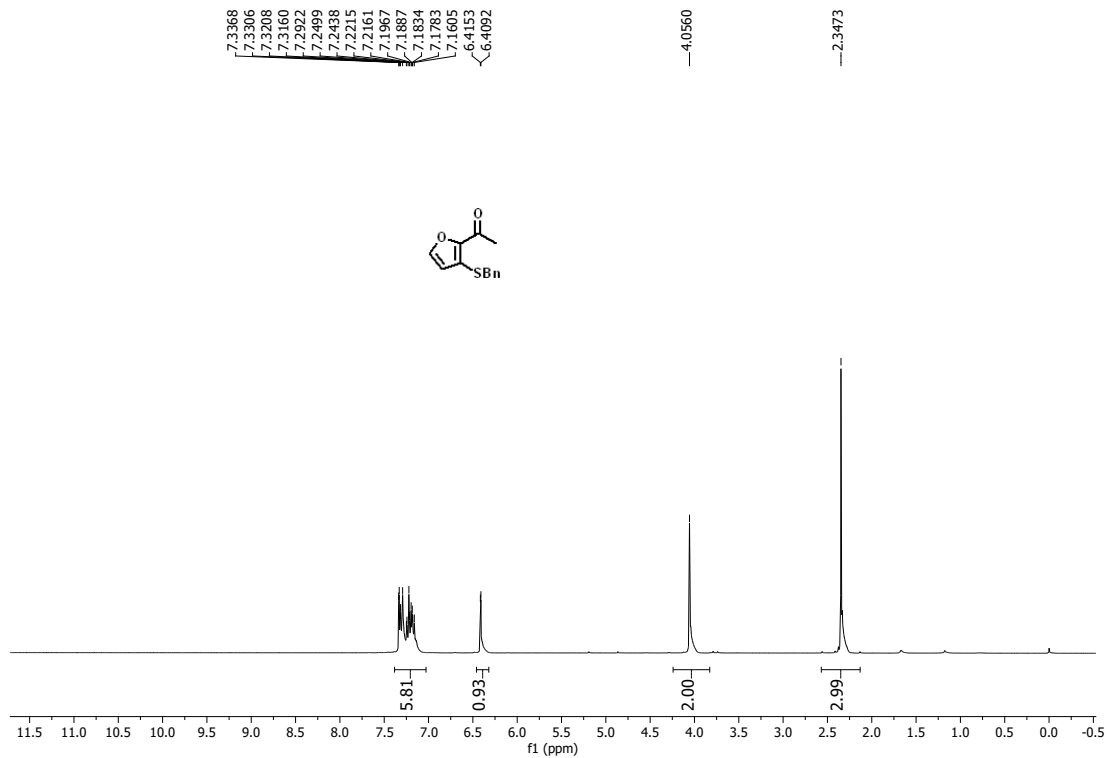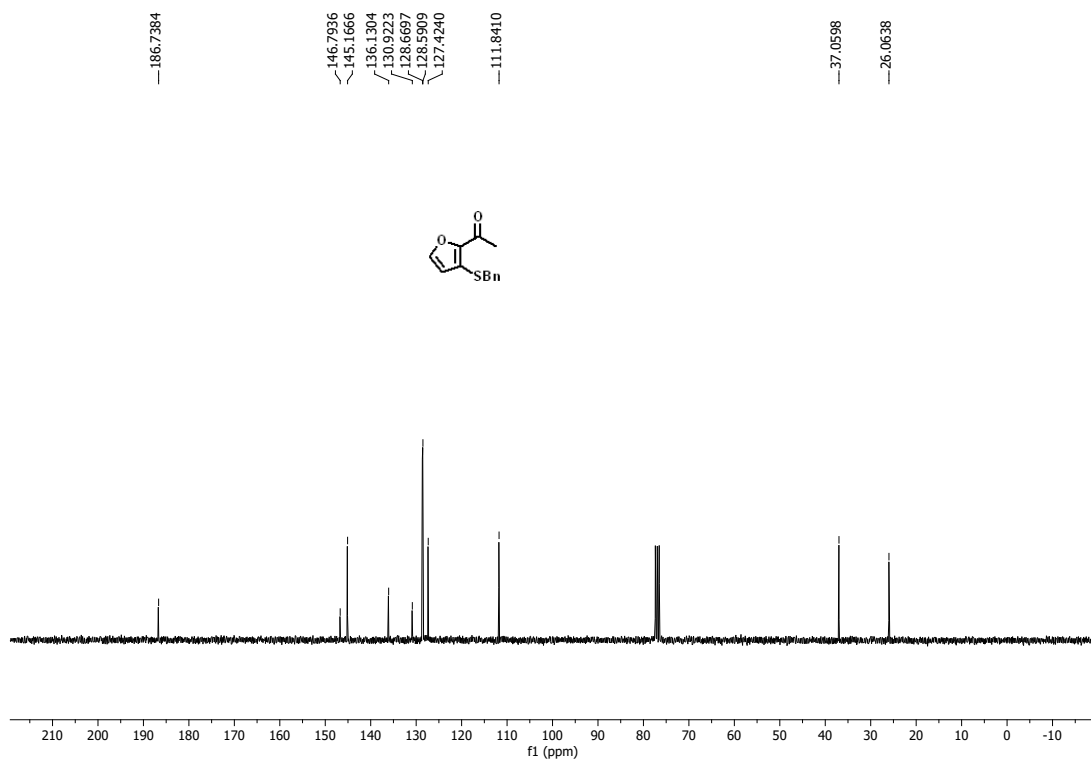

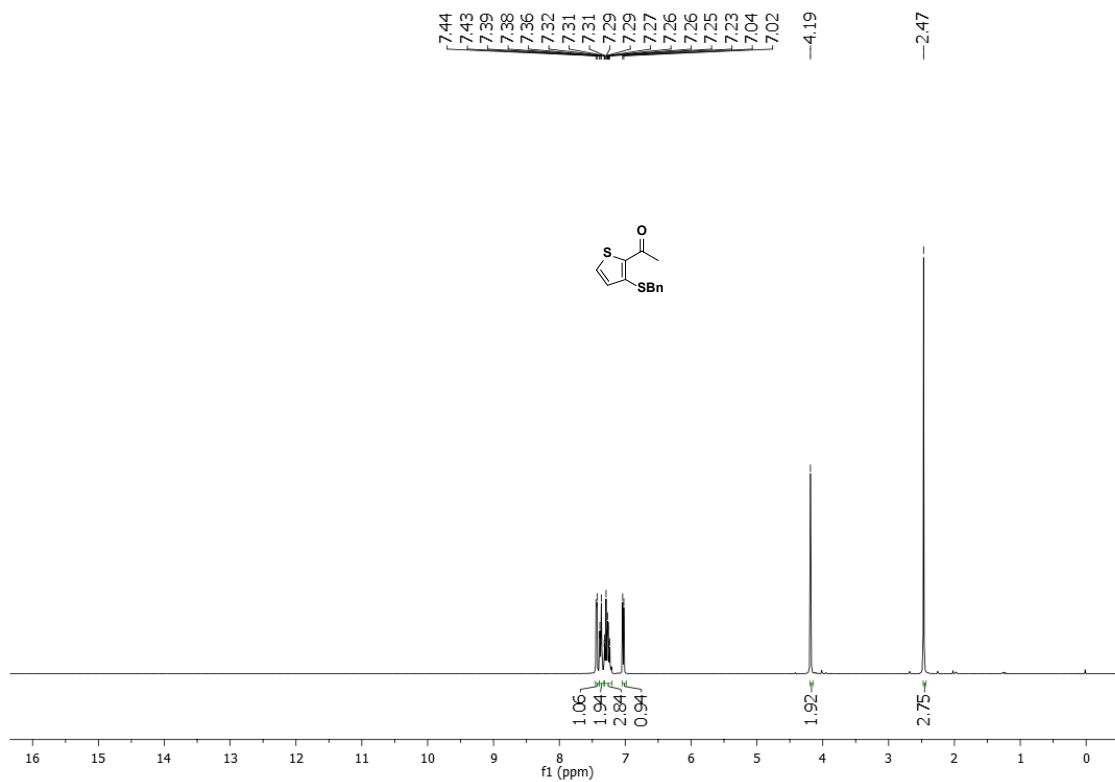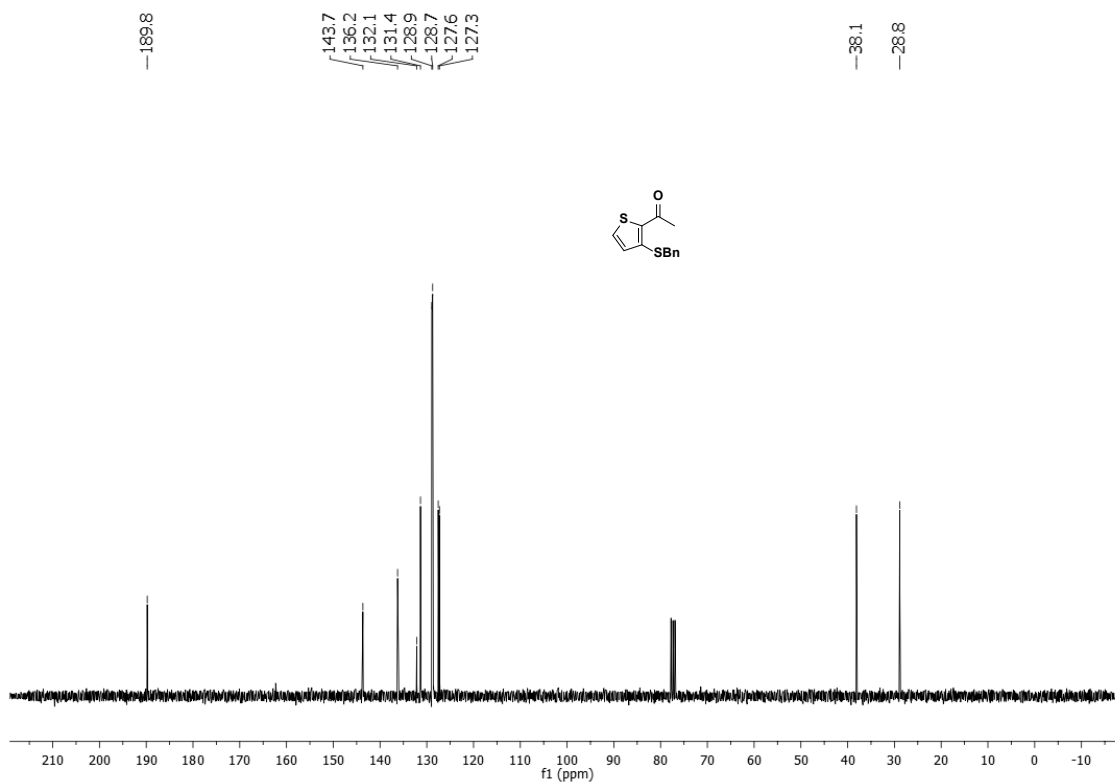

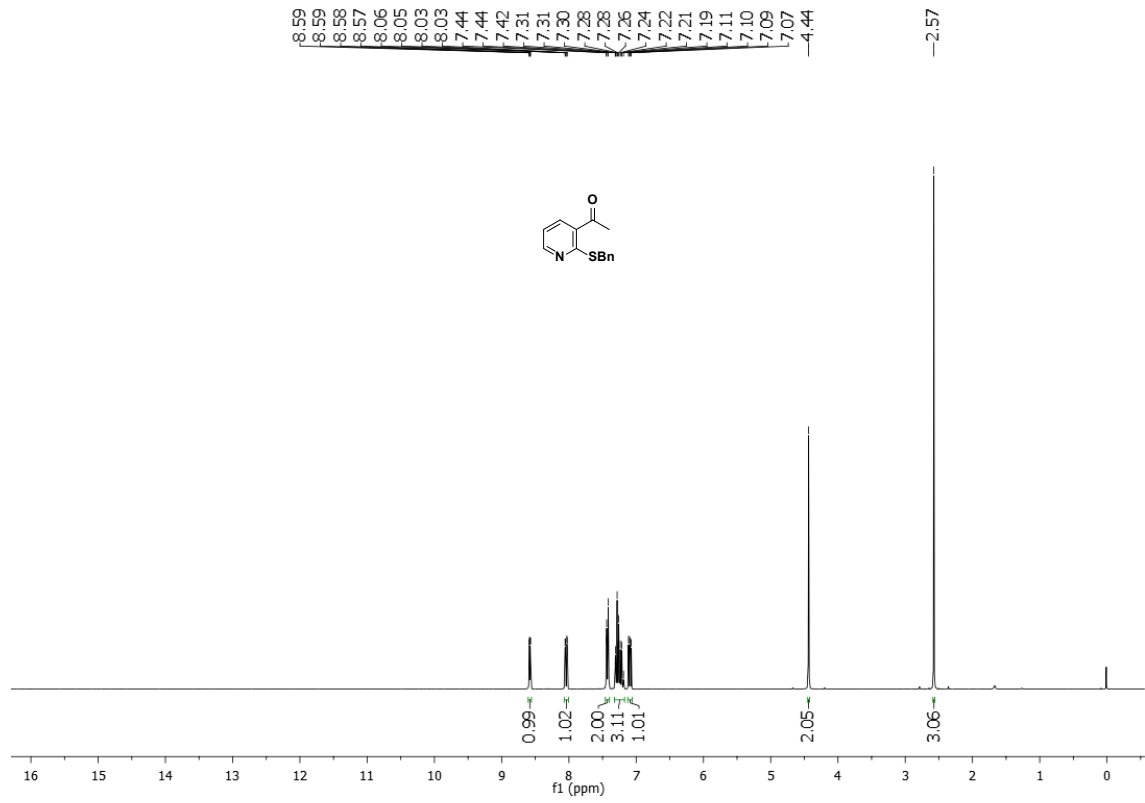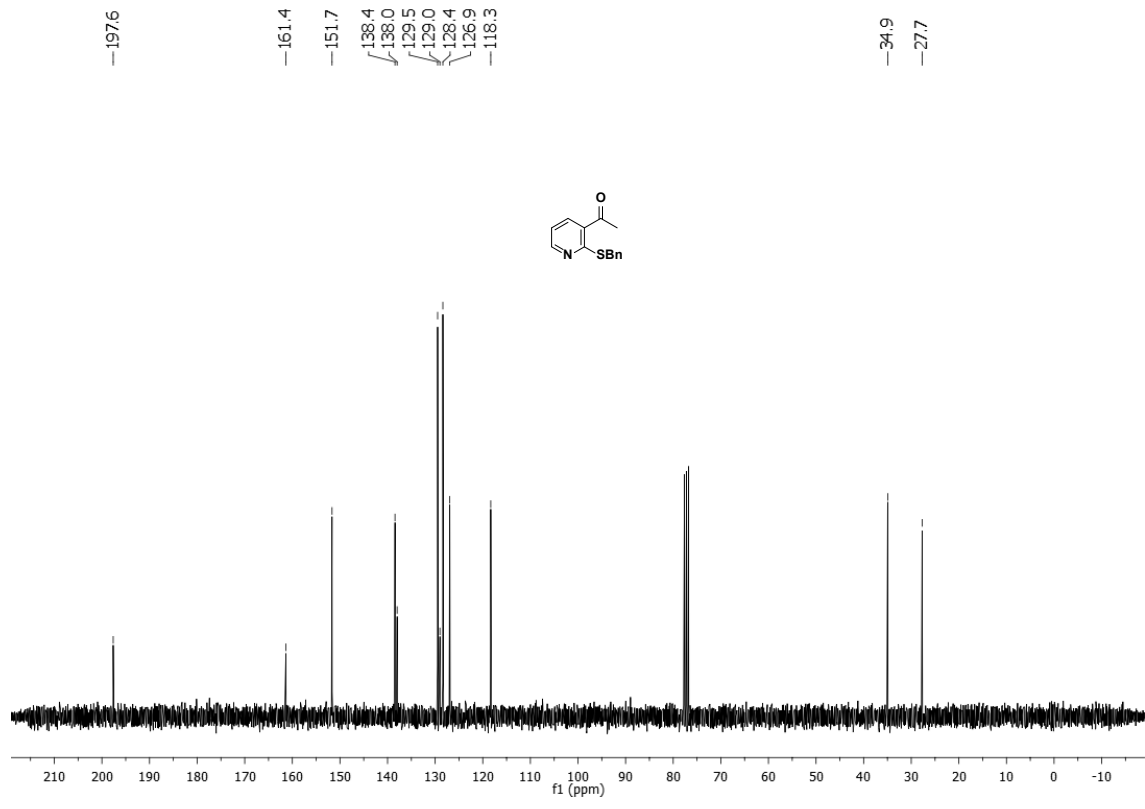

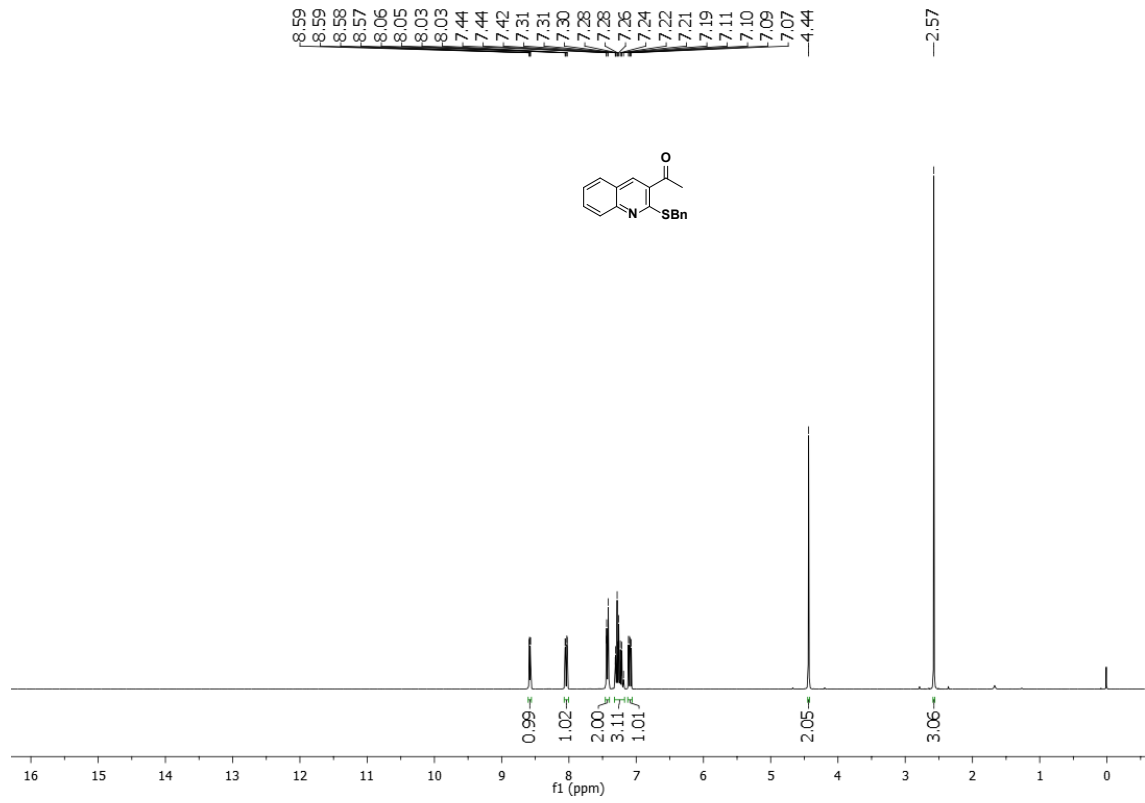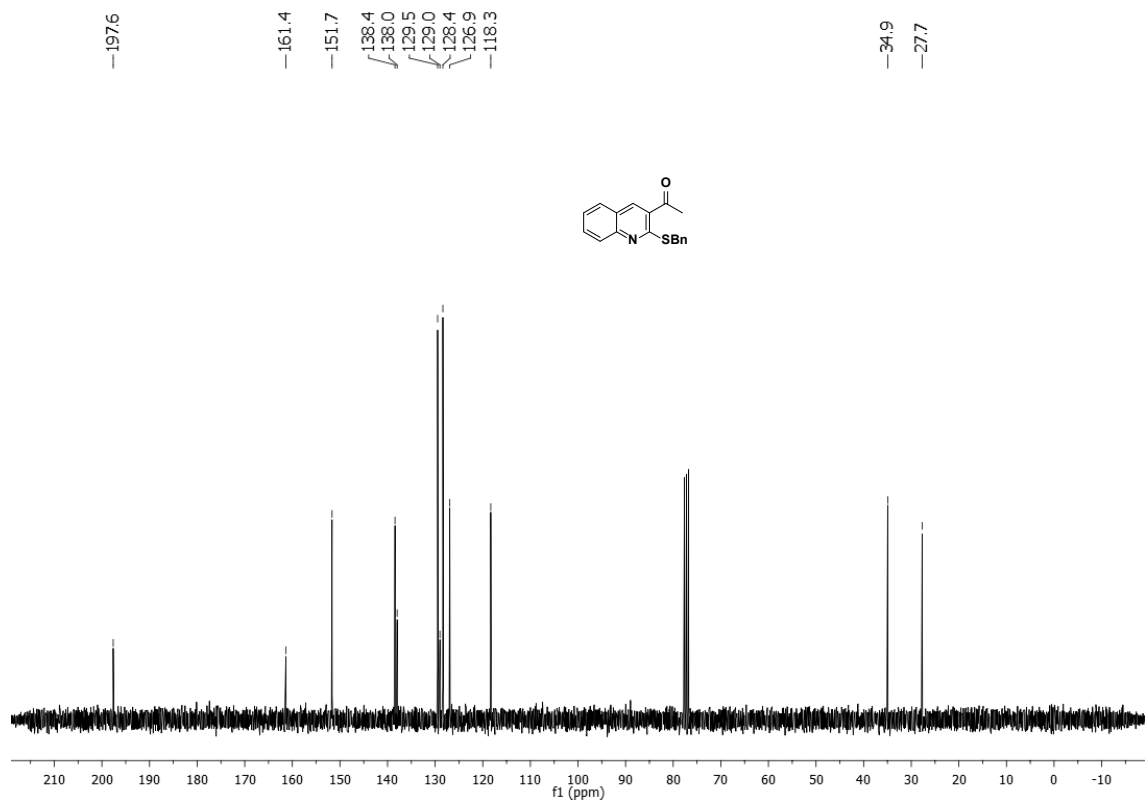

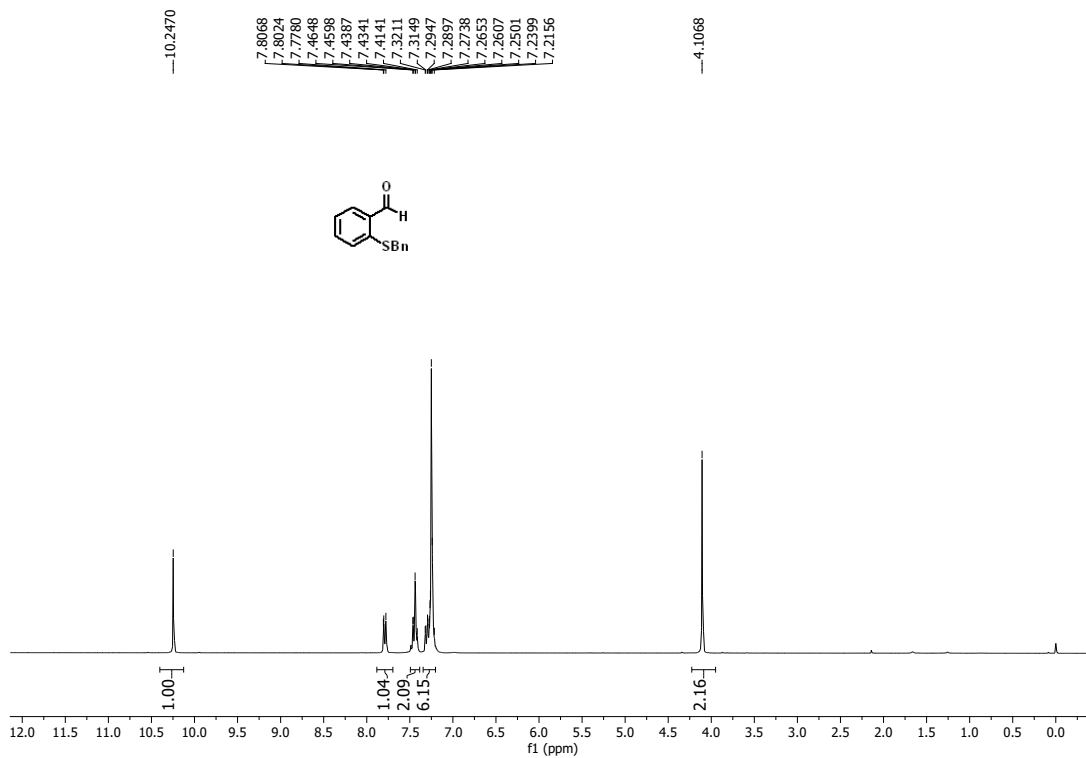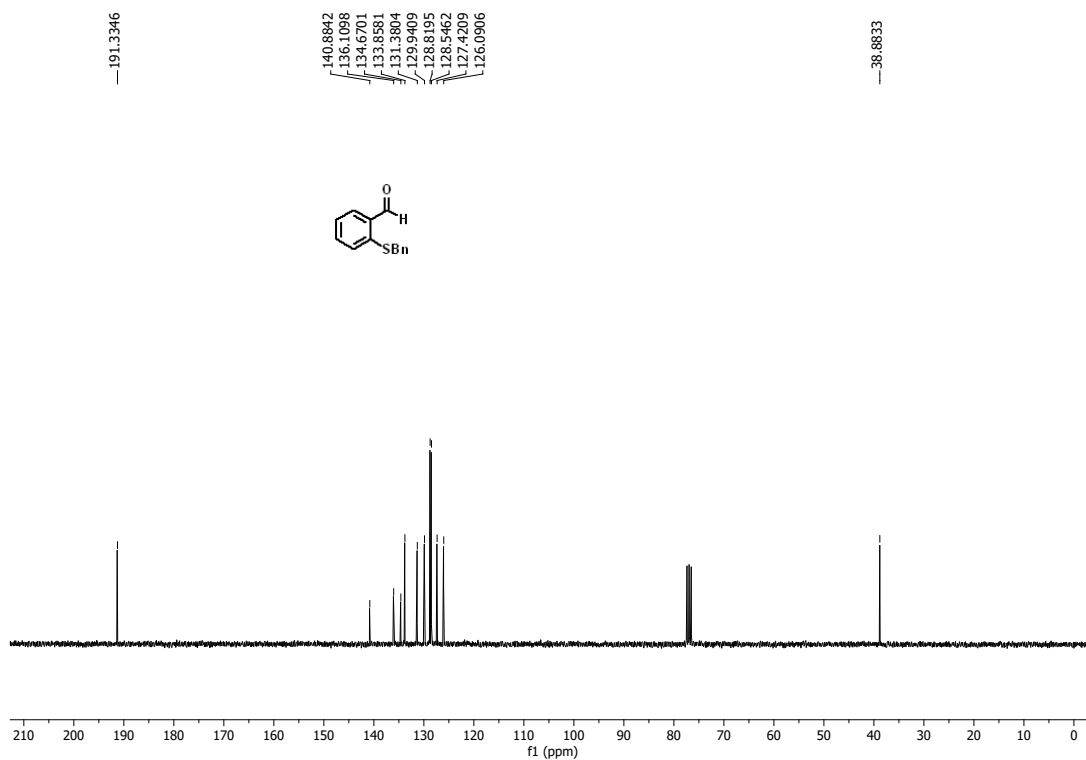

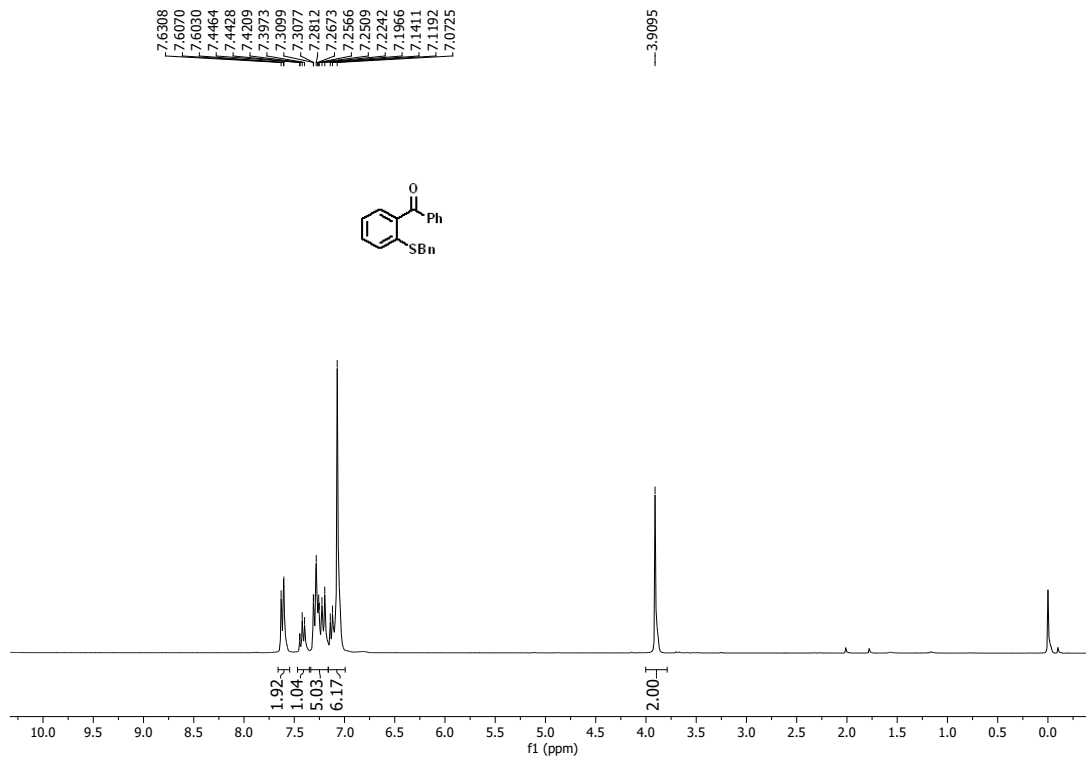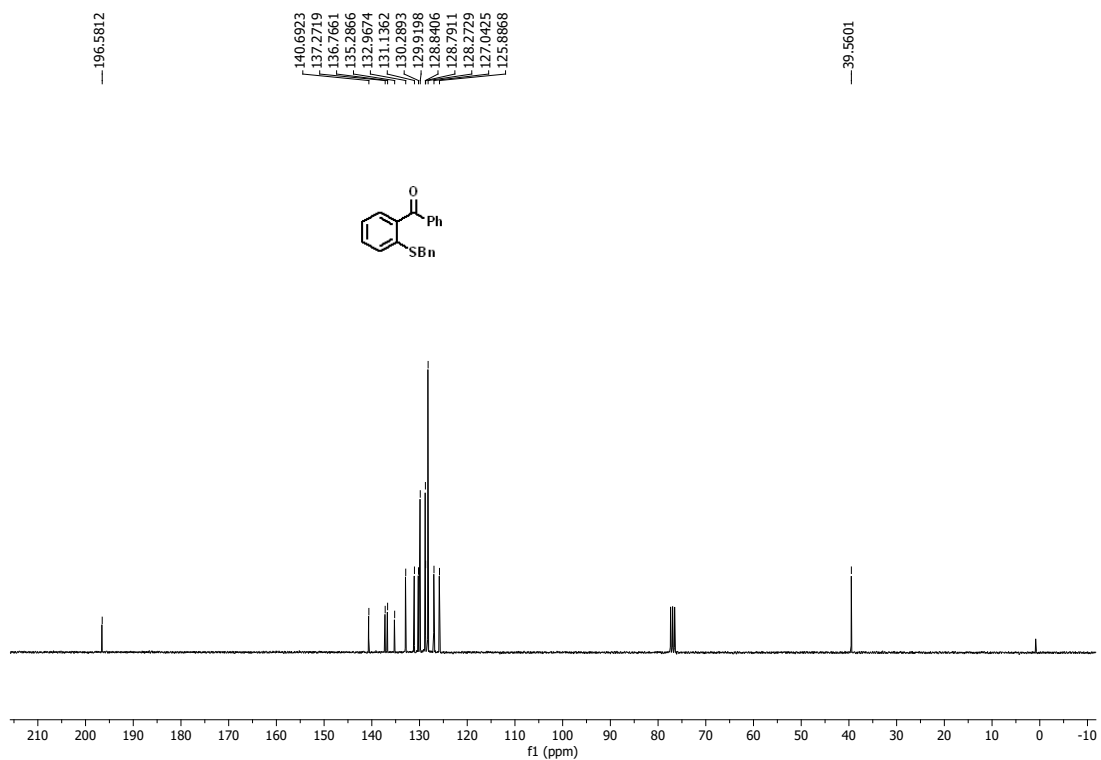

## 10.2. NMR Spectra of Selenides SI-10

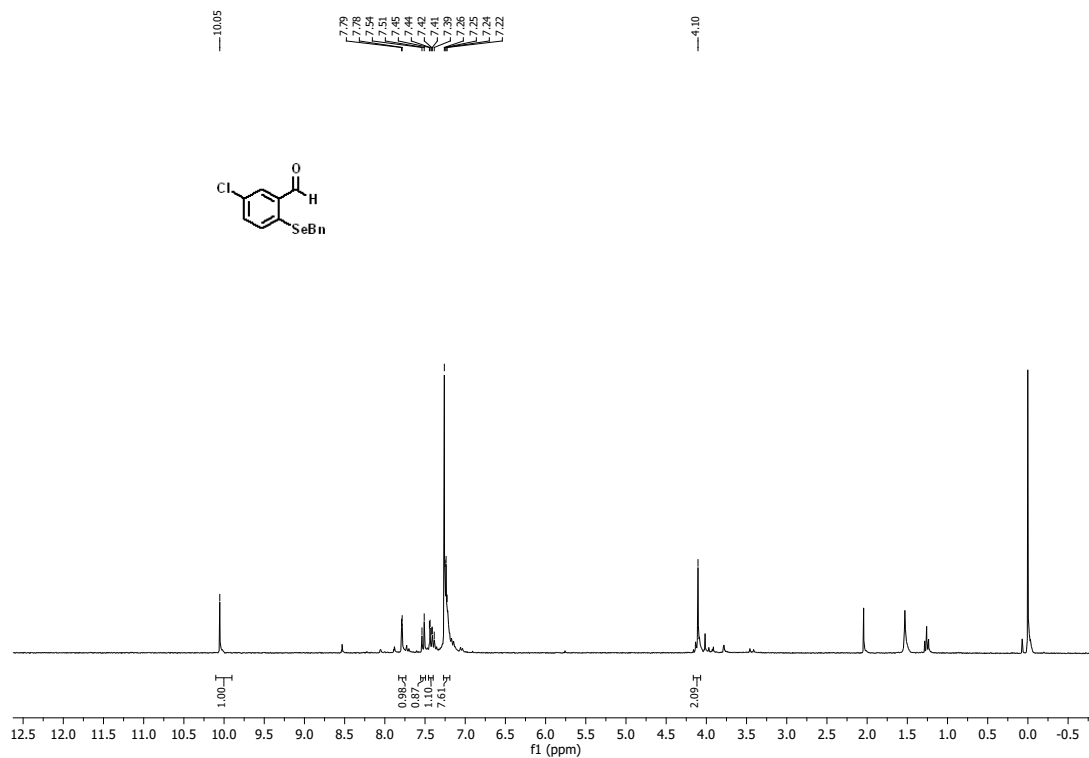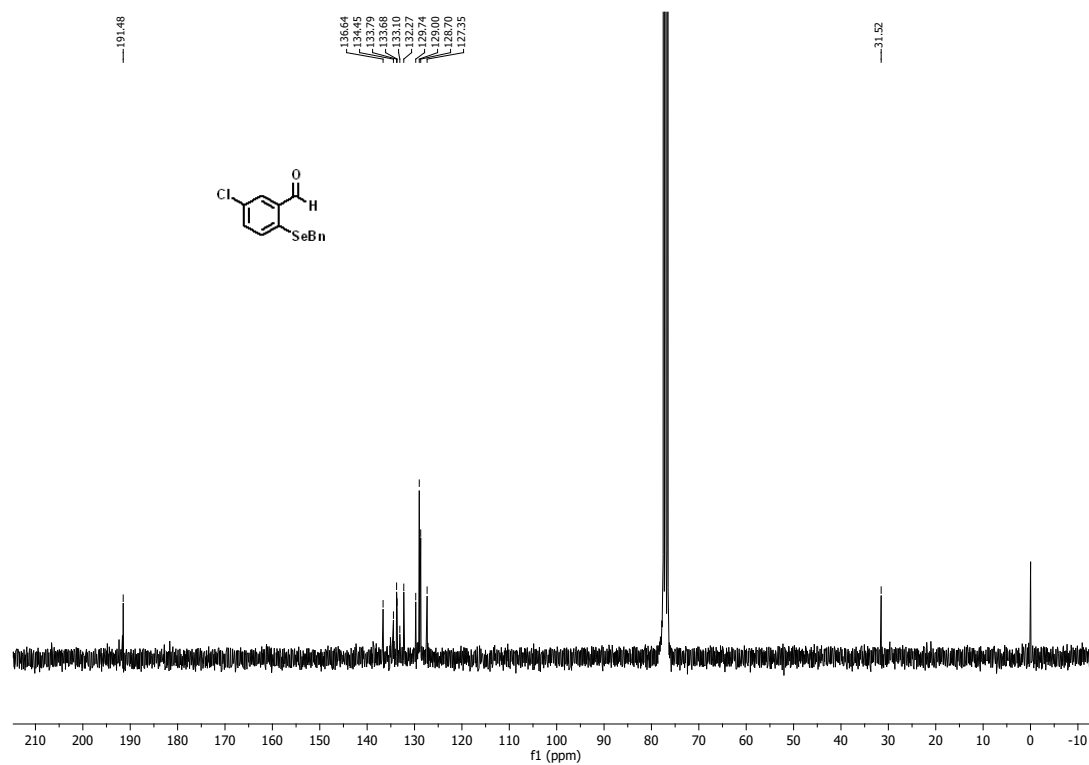



### 10.3. NMR Spectra of $\alpha$ -Imino-oxy Acids 1

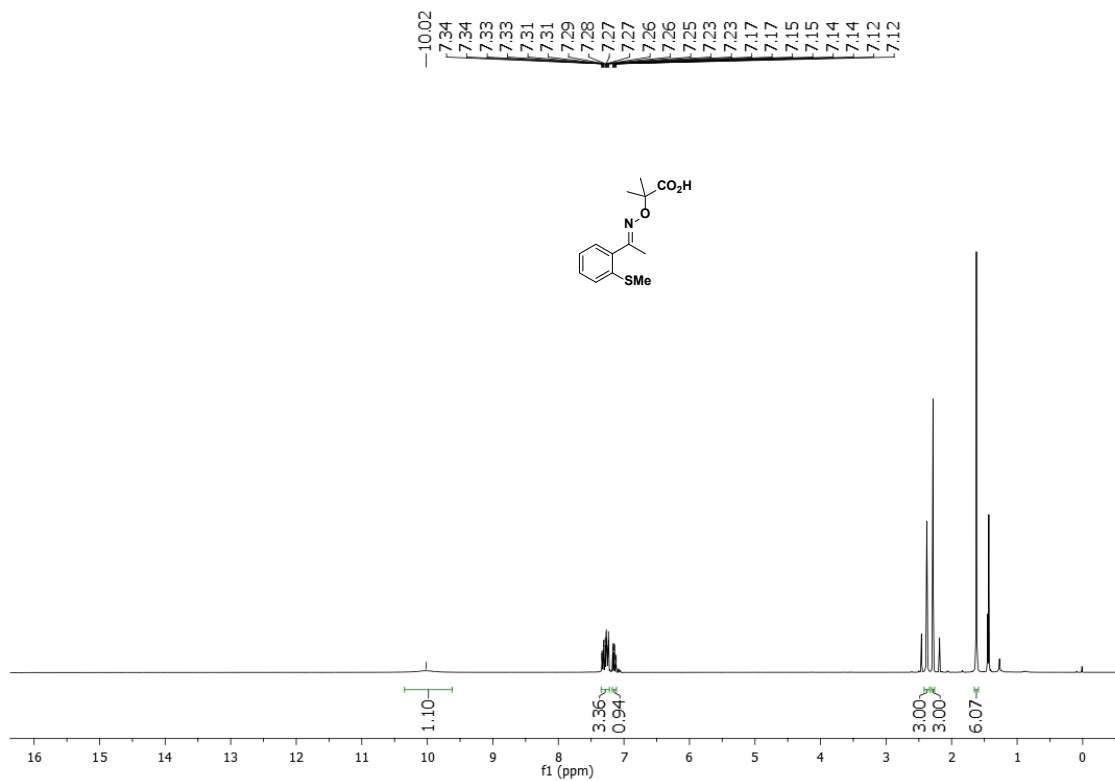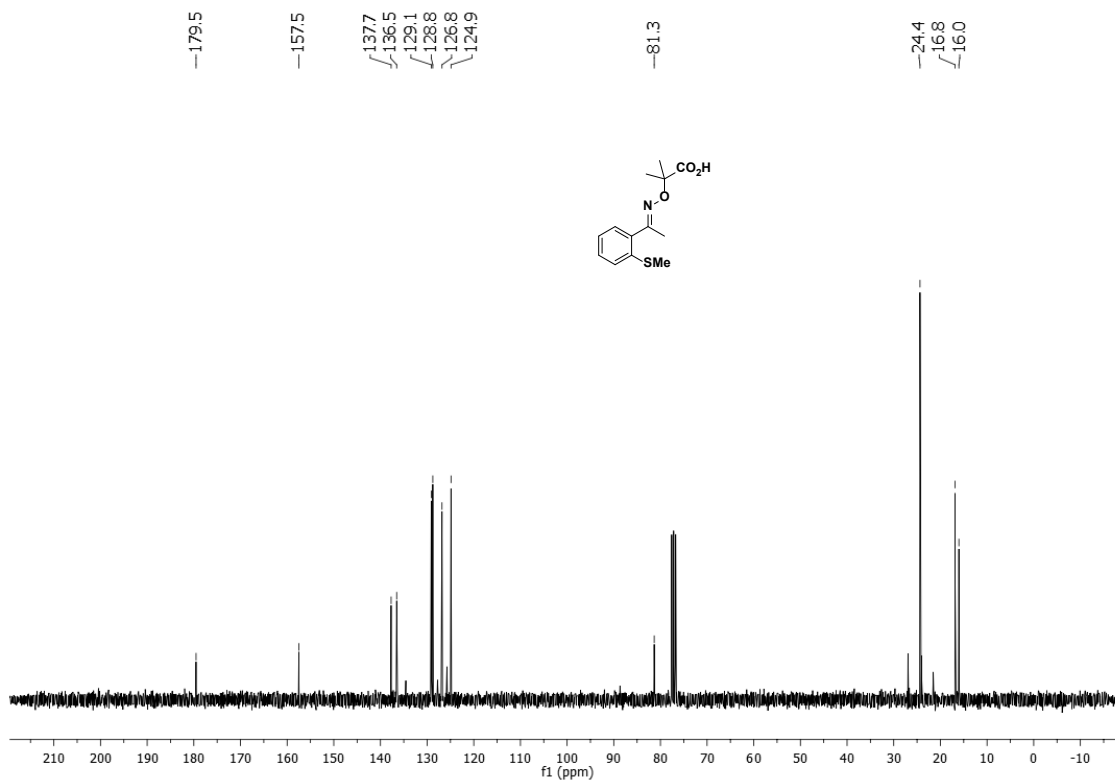

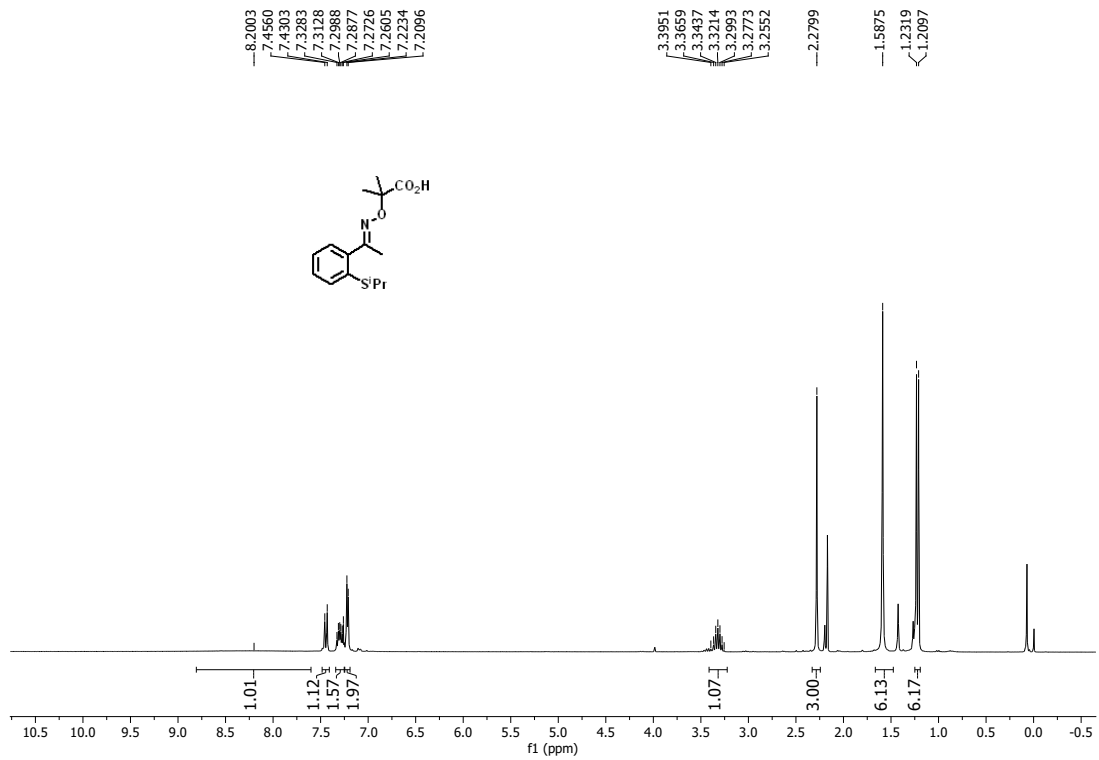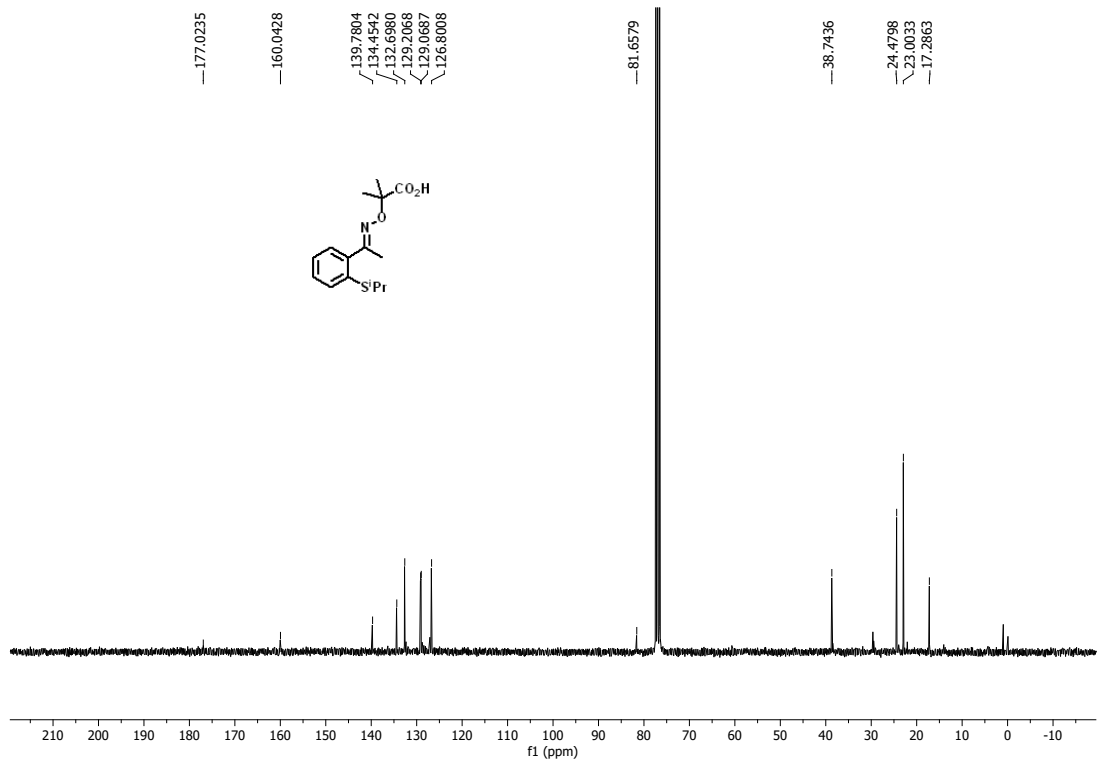

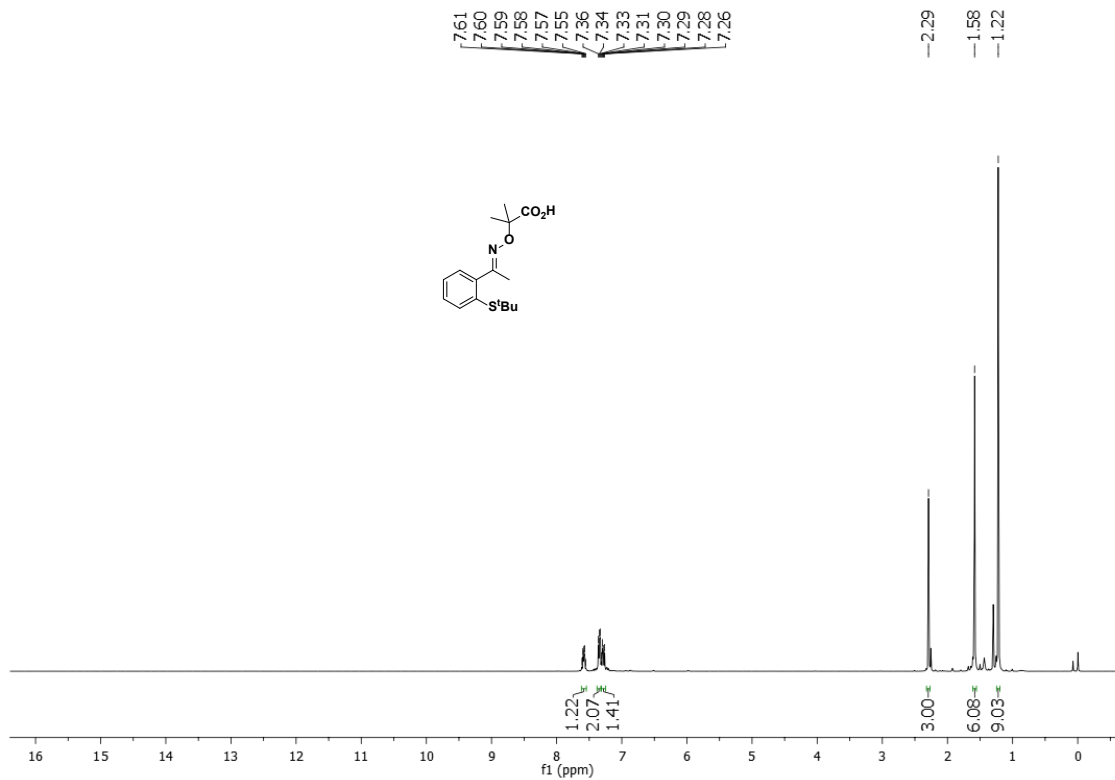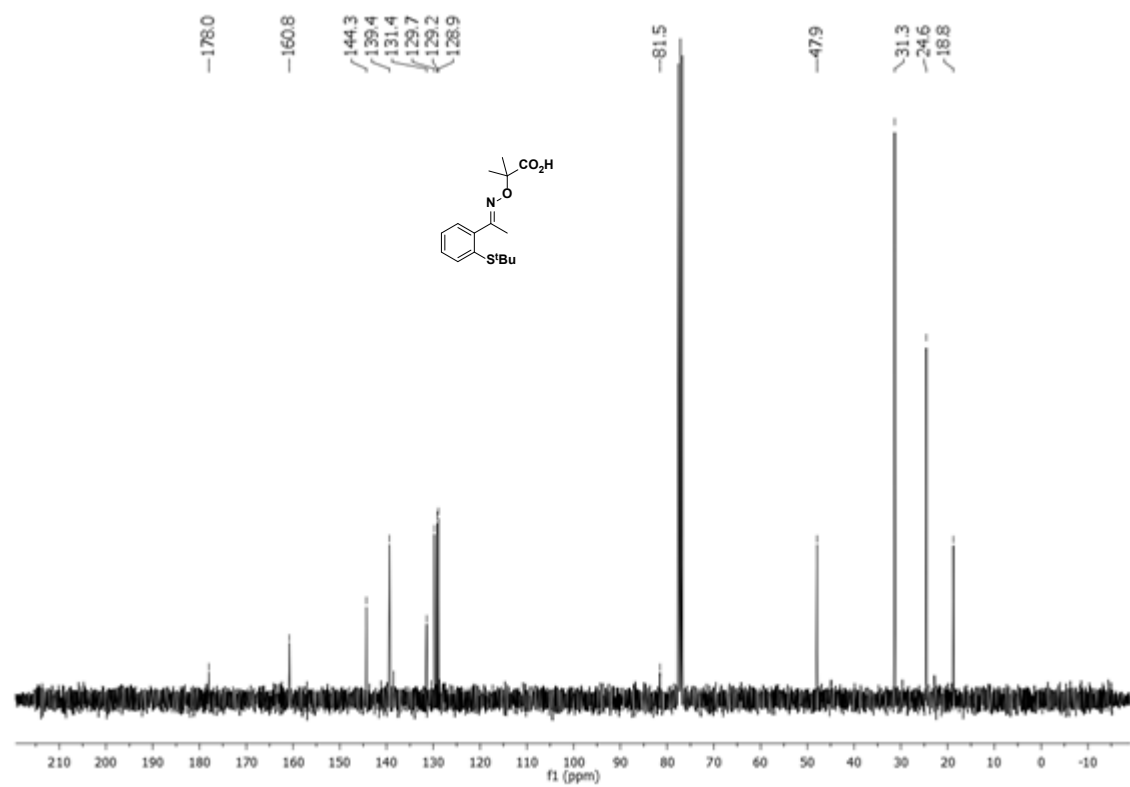

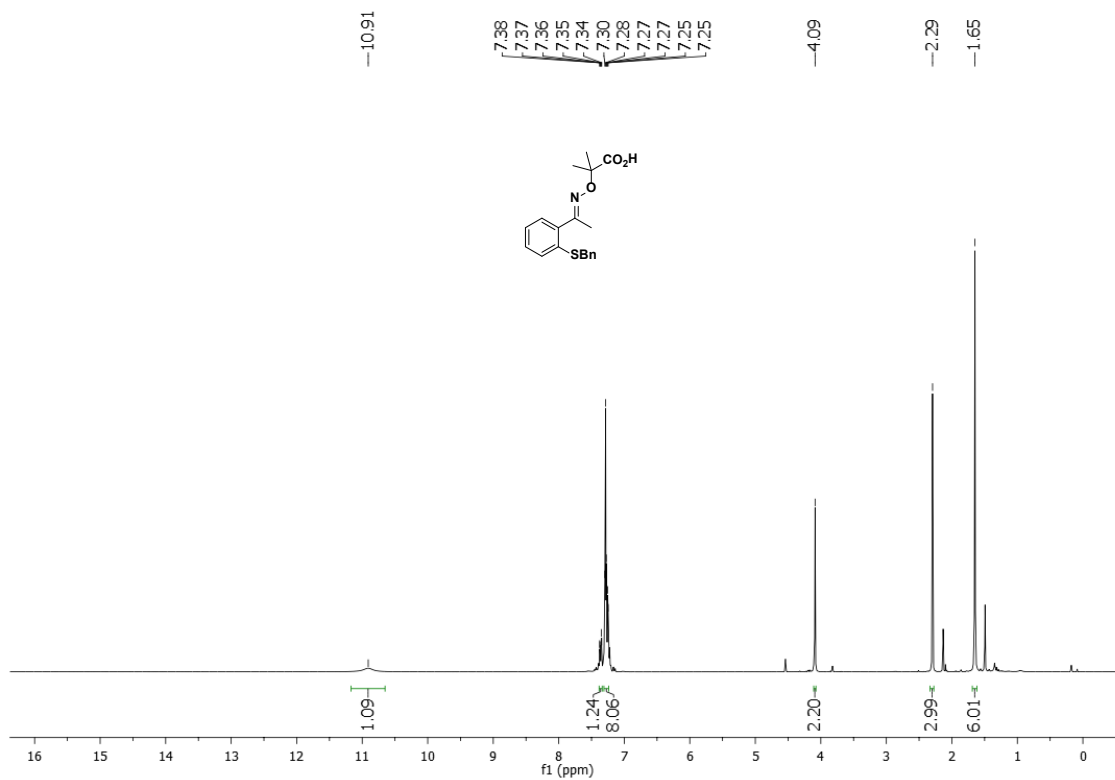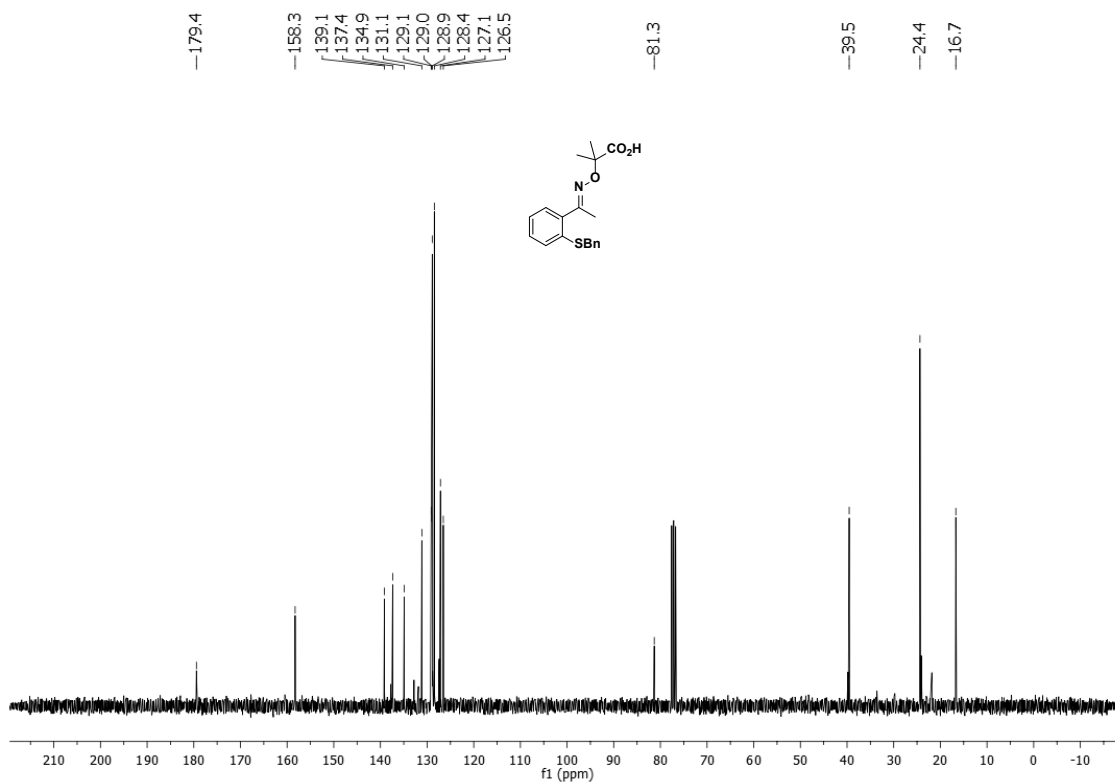

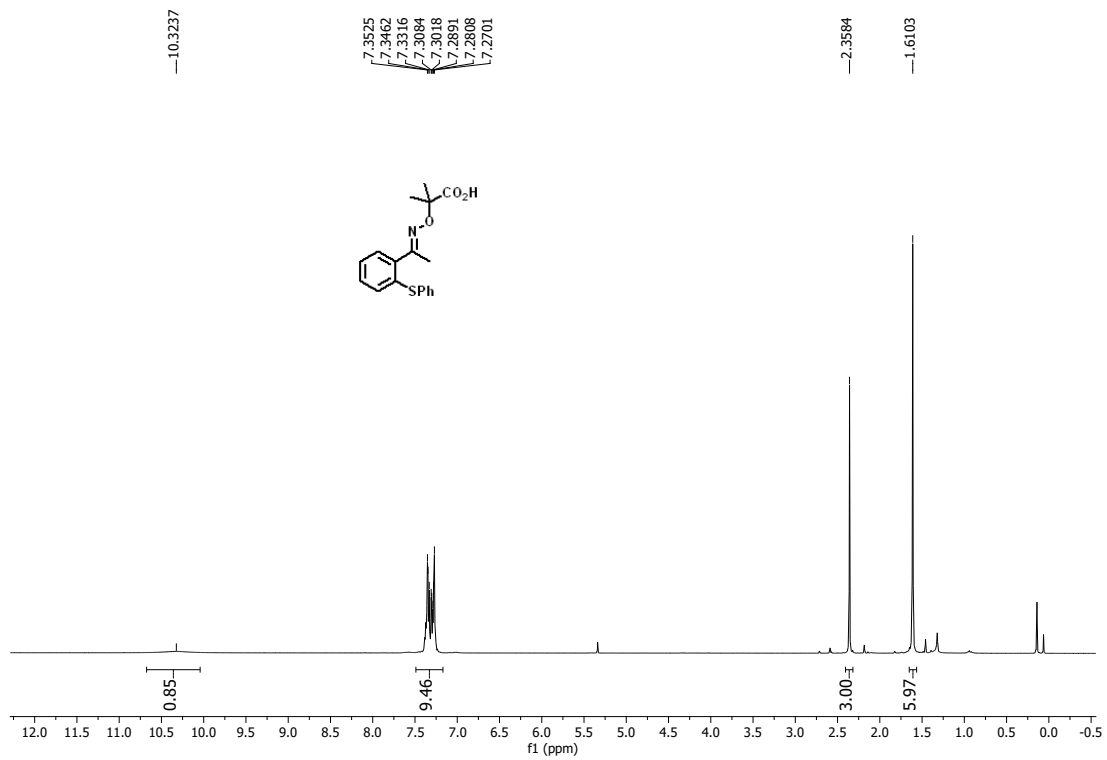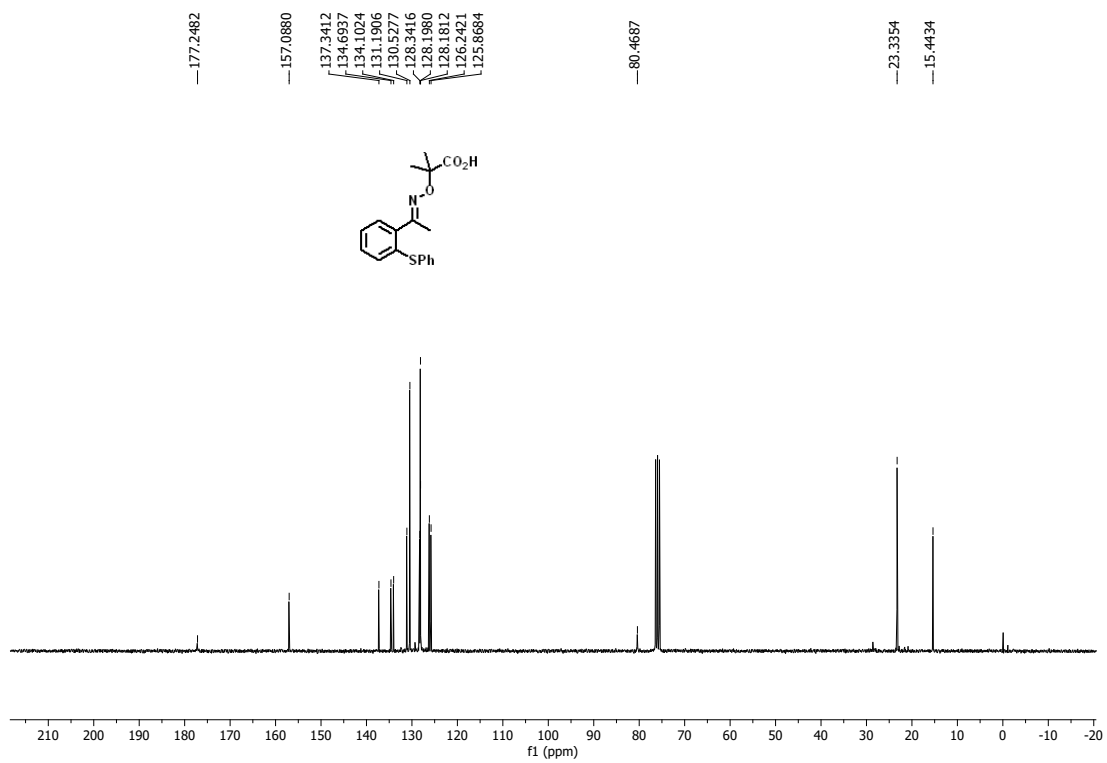

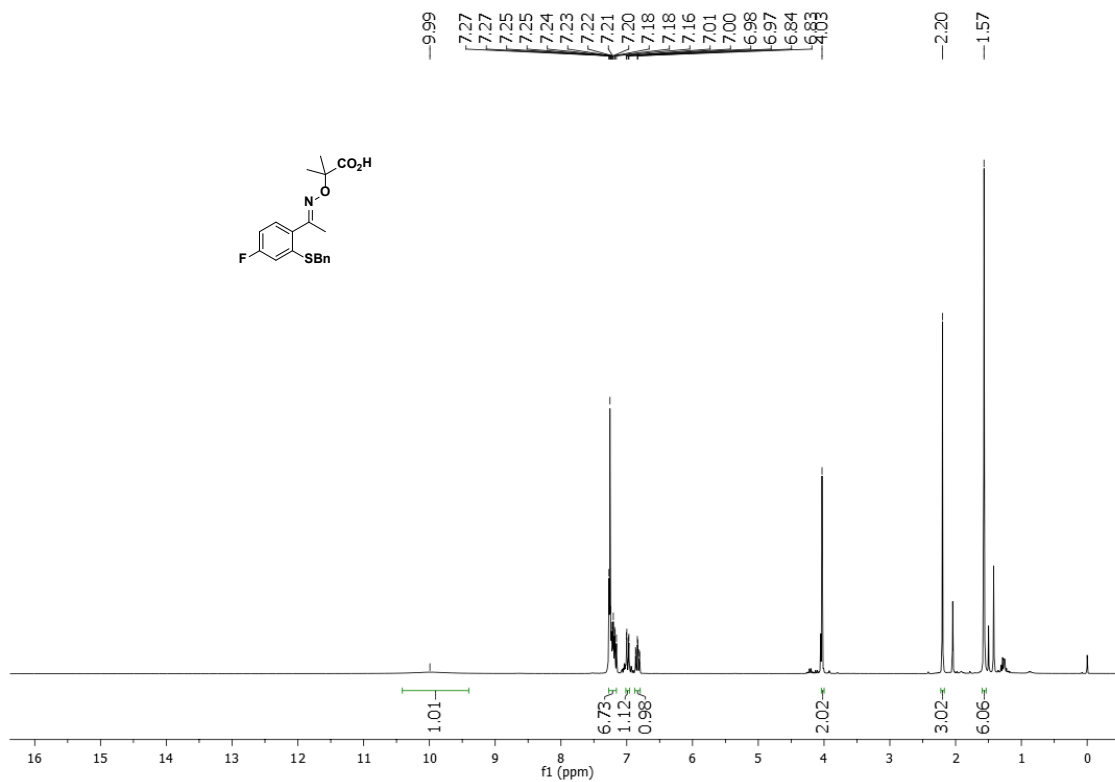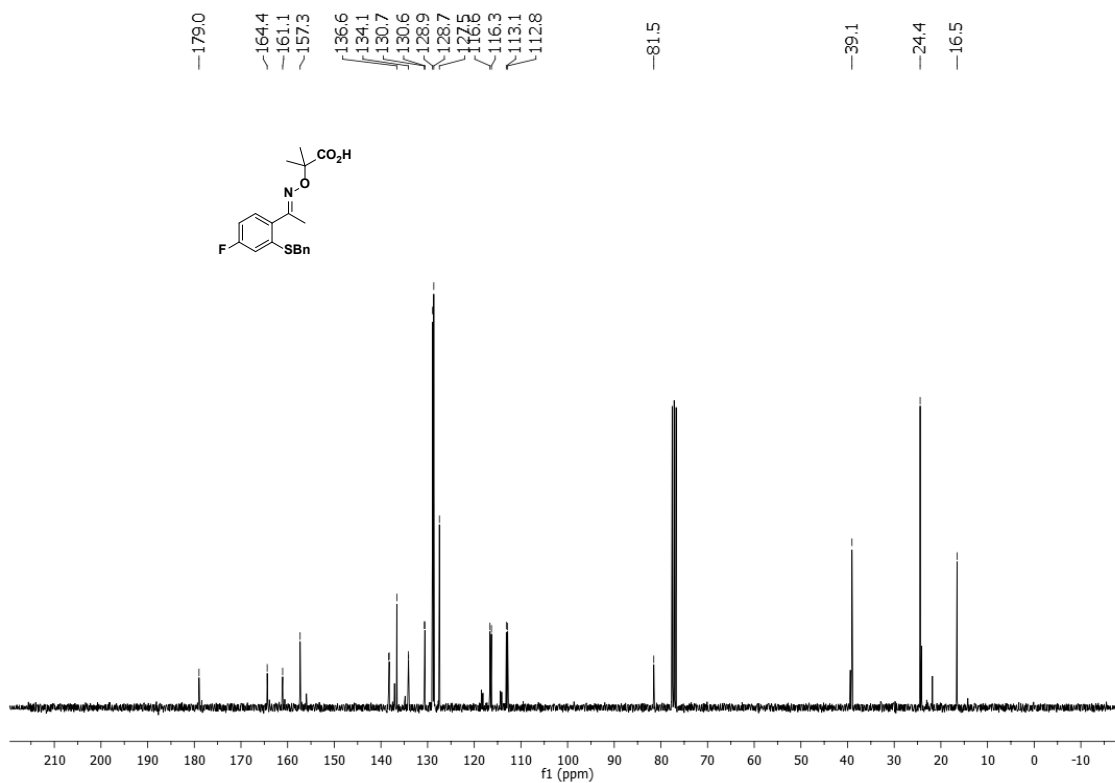

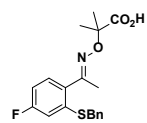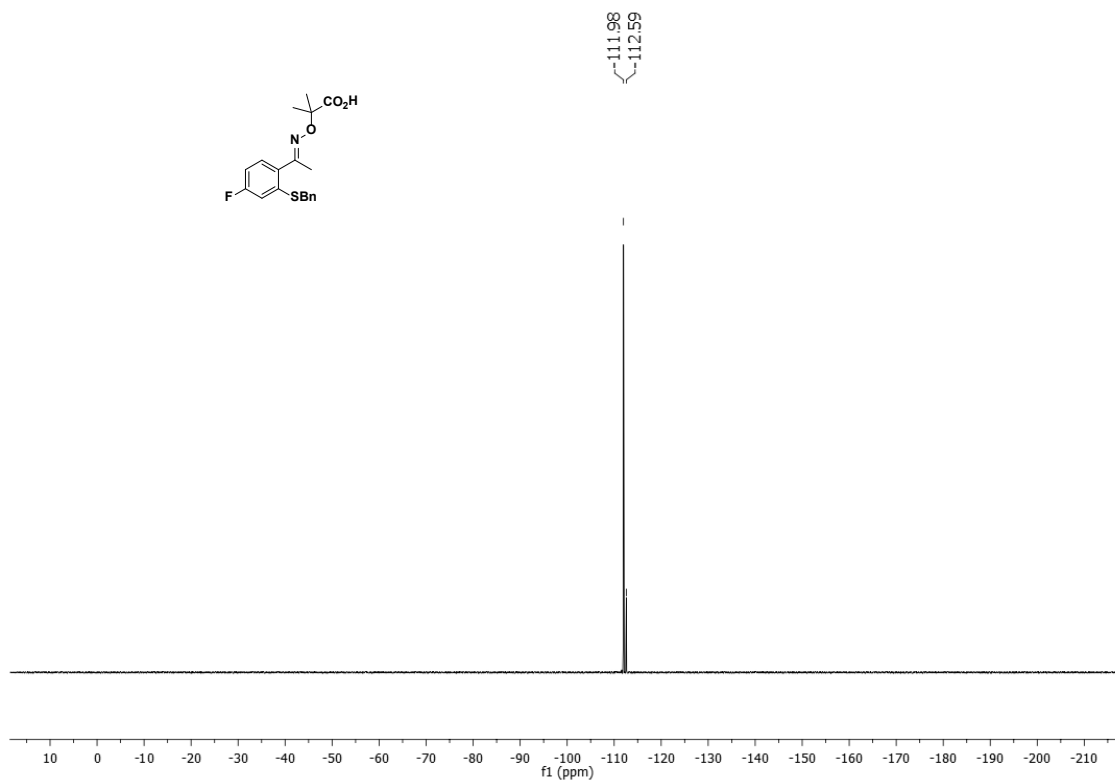

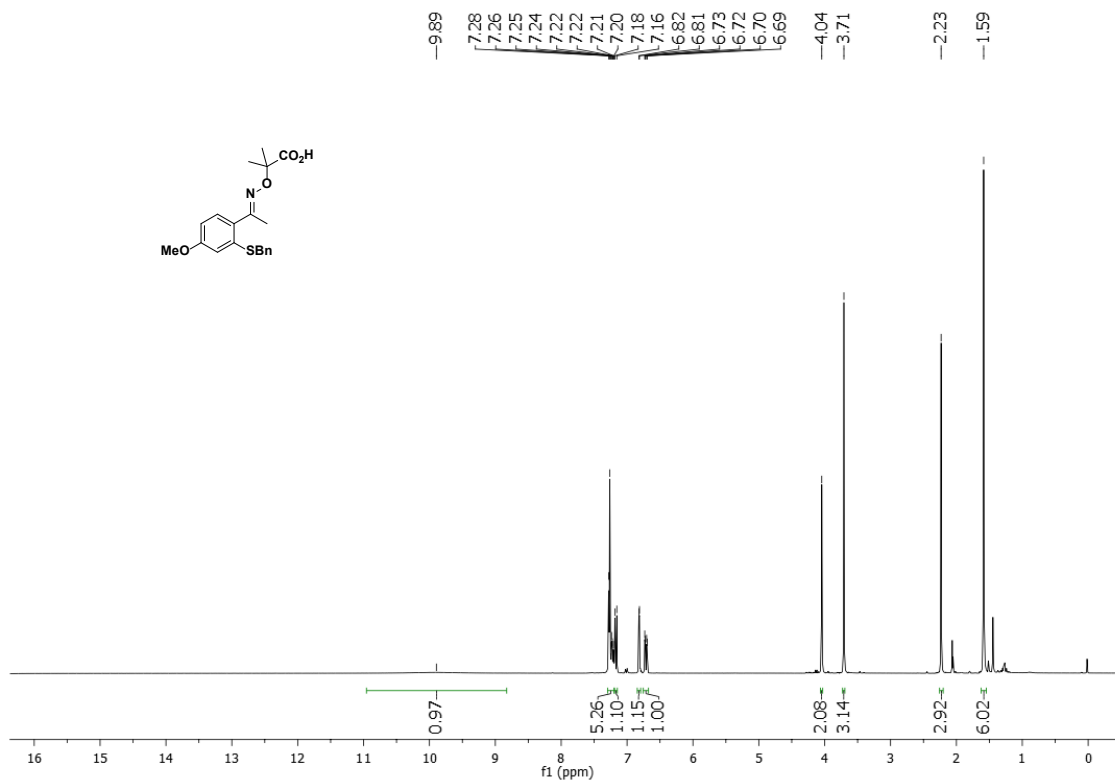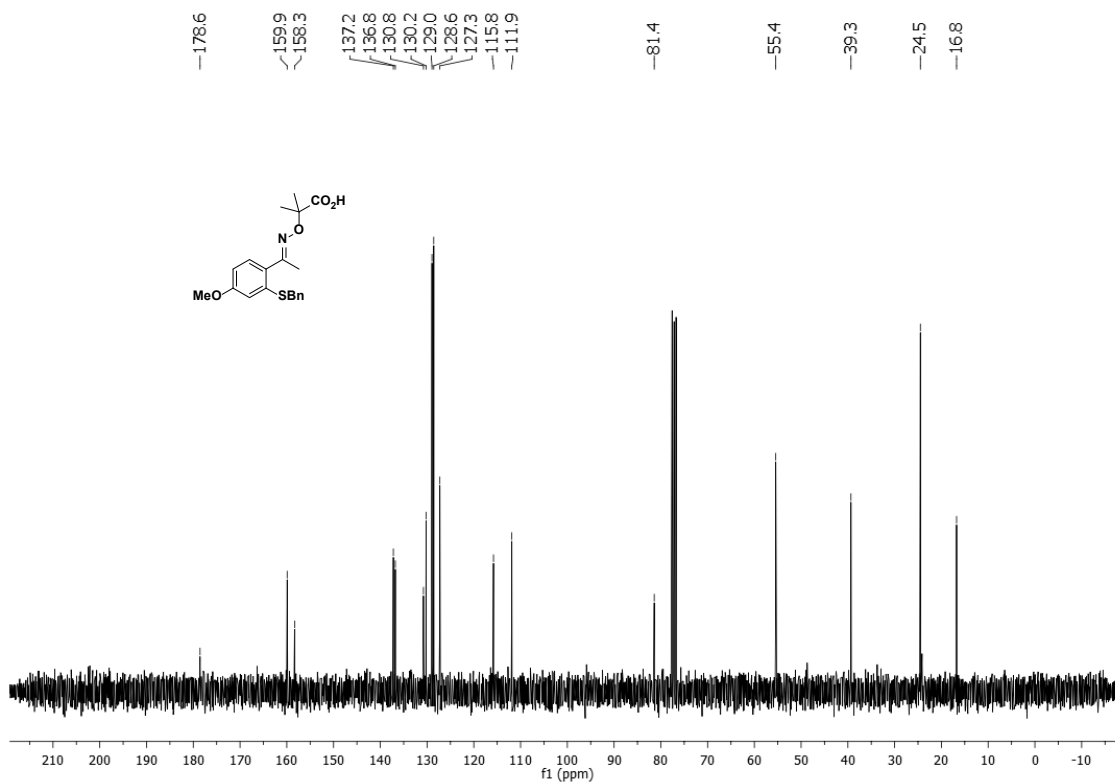



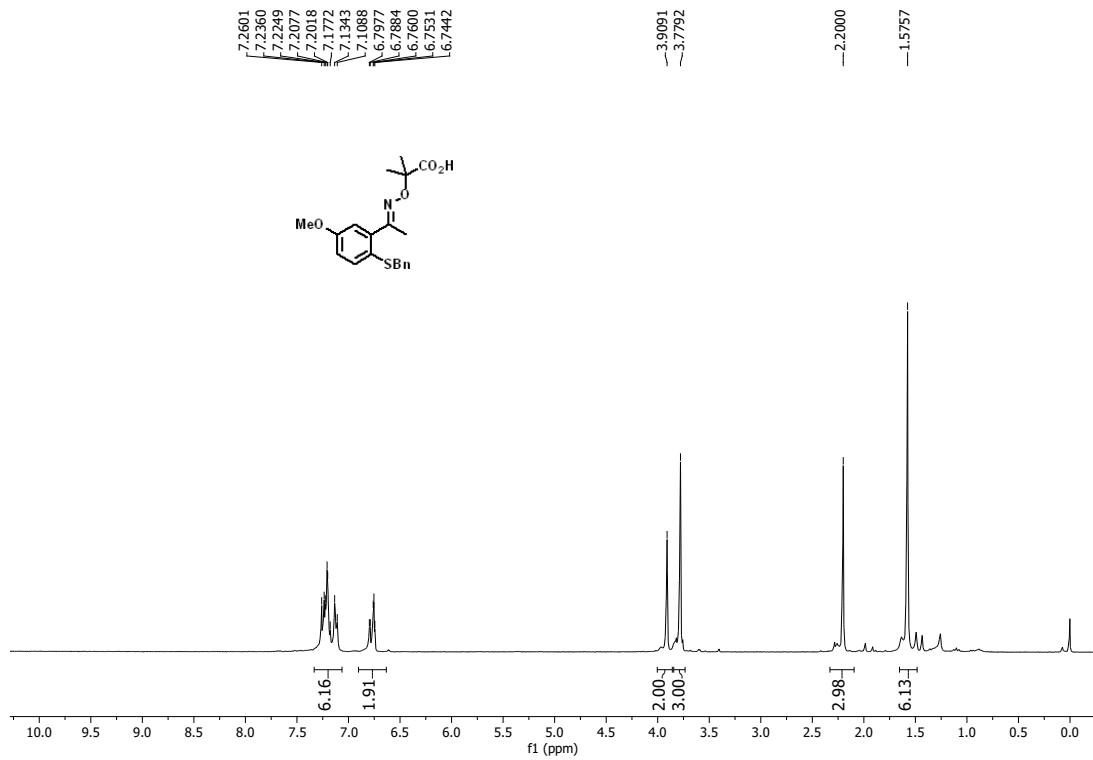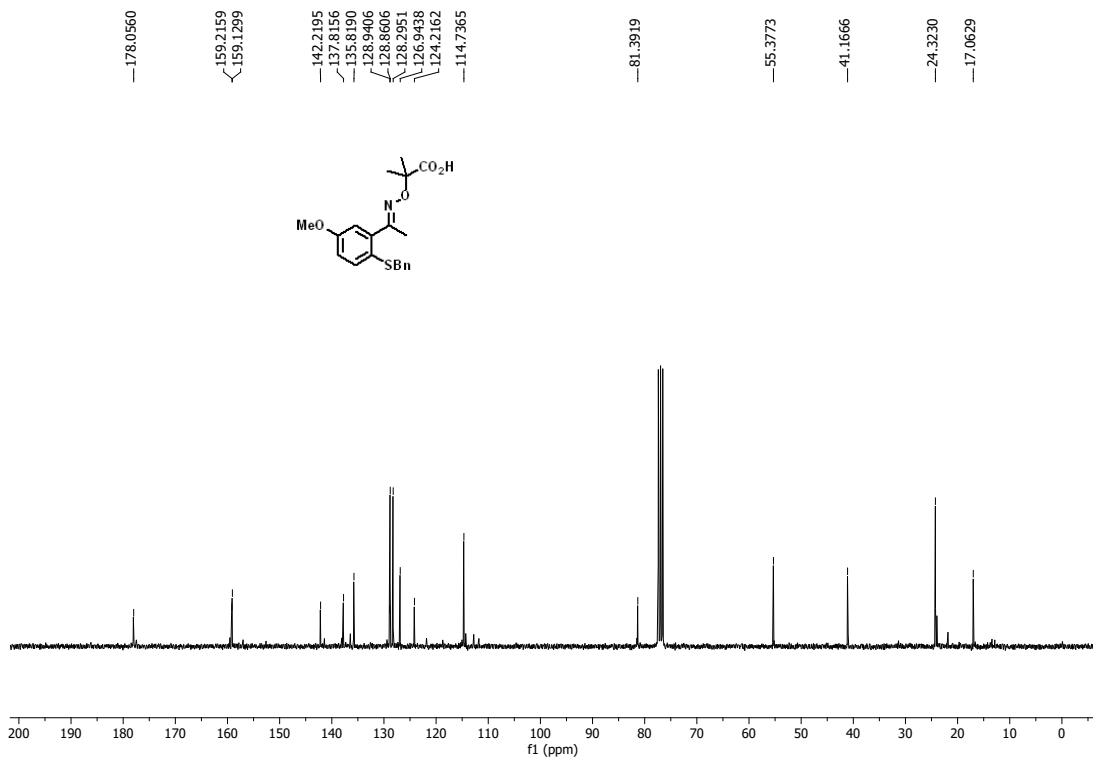

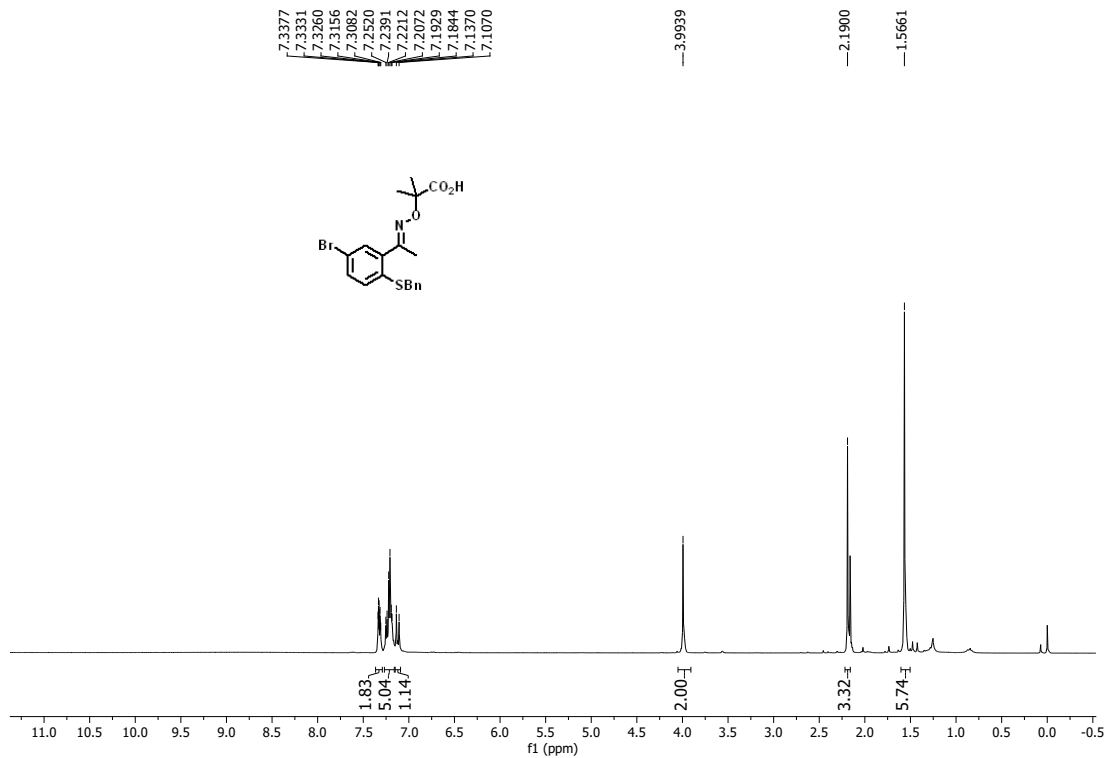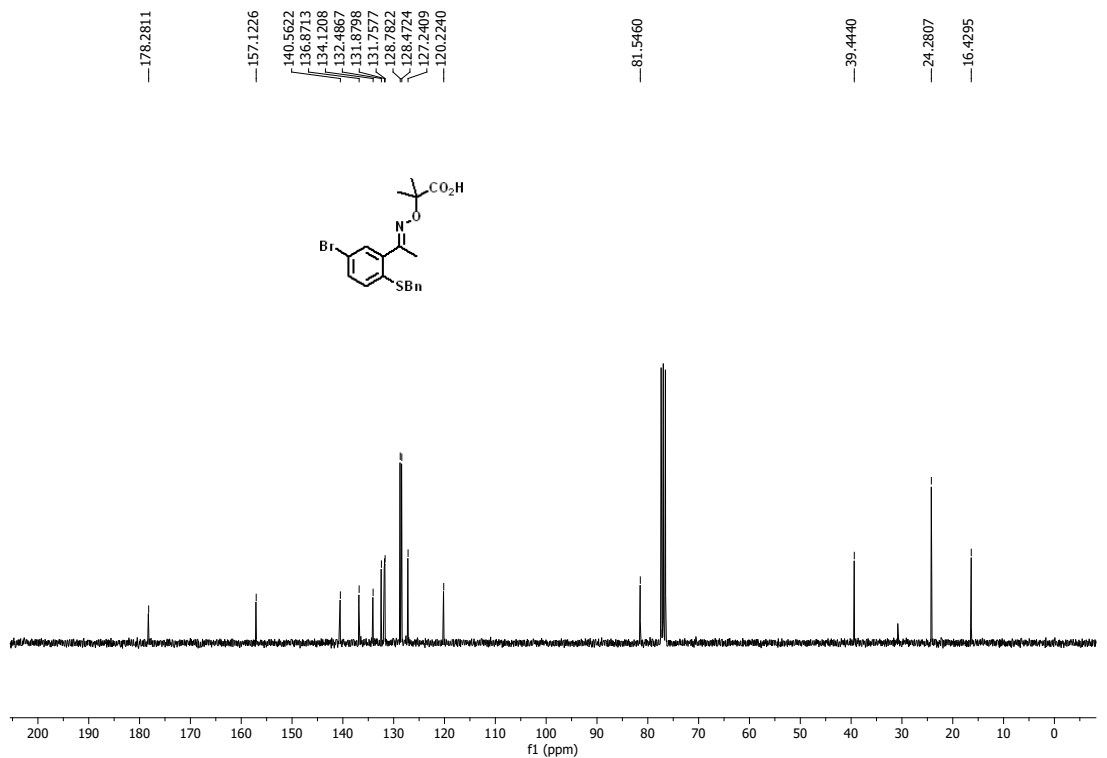

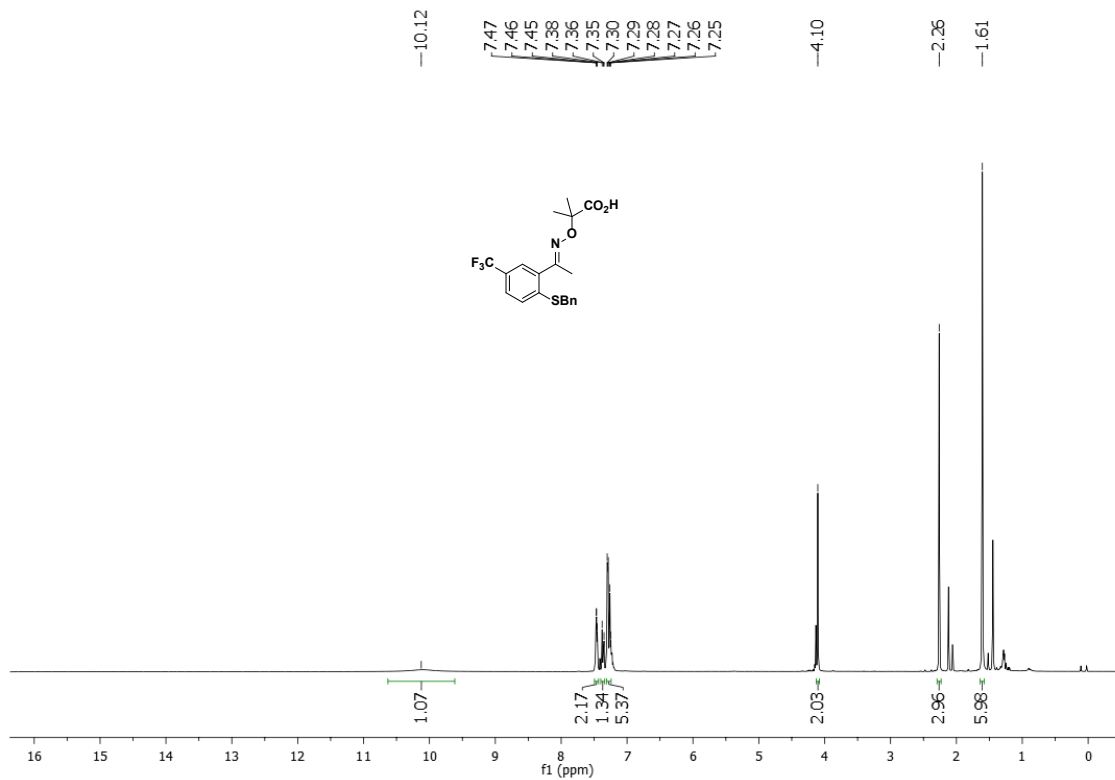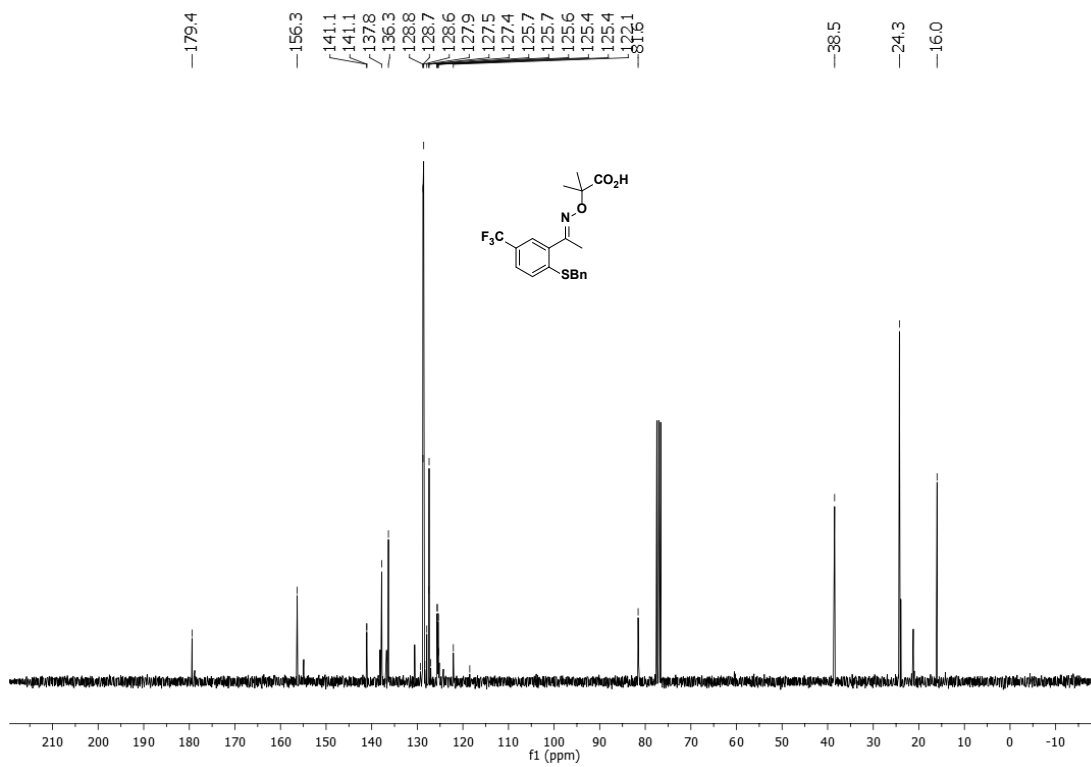

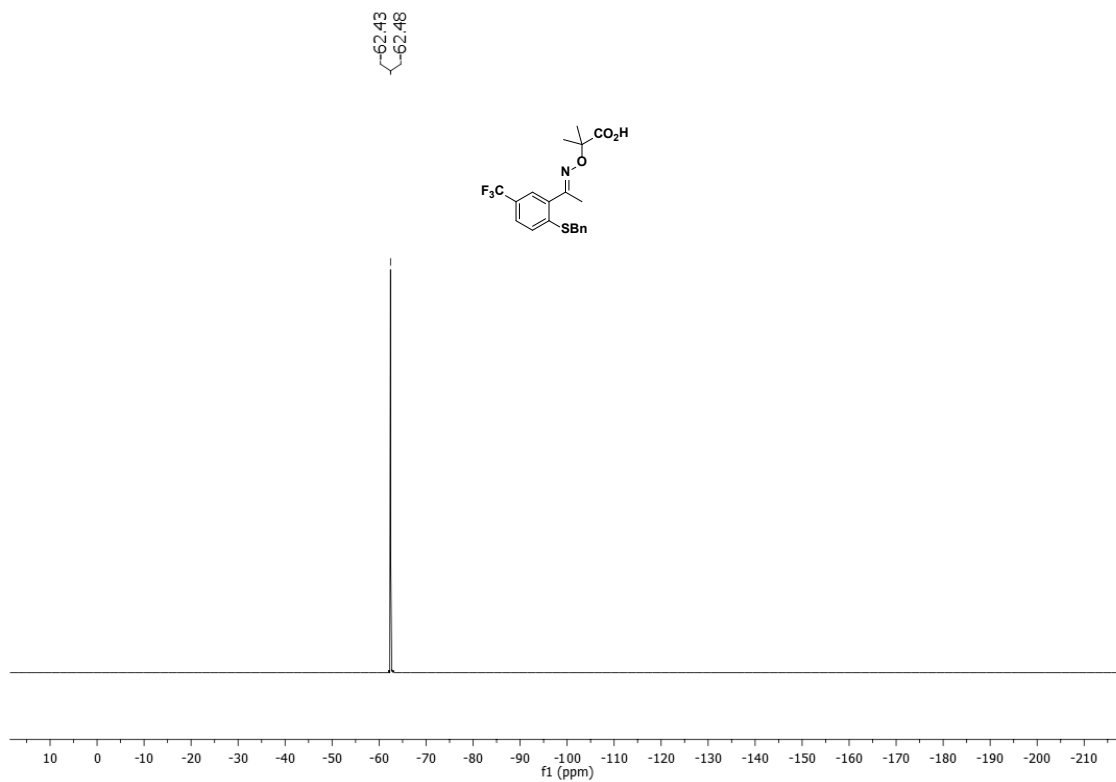

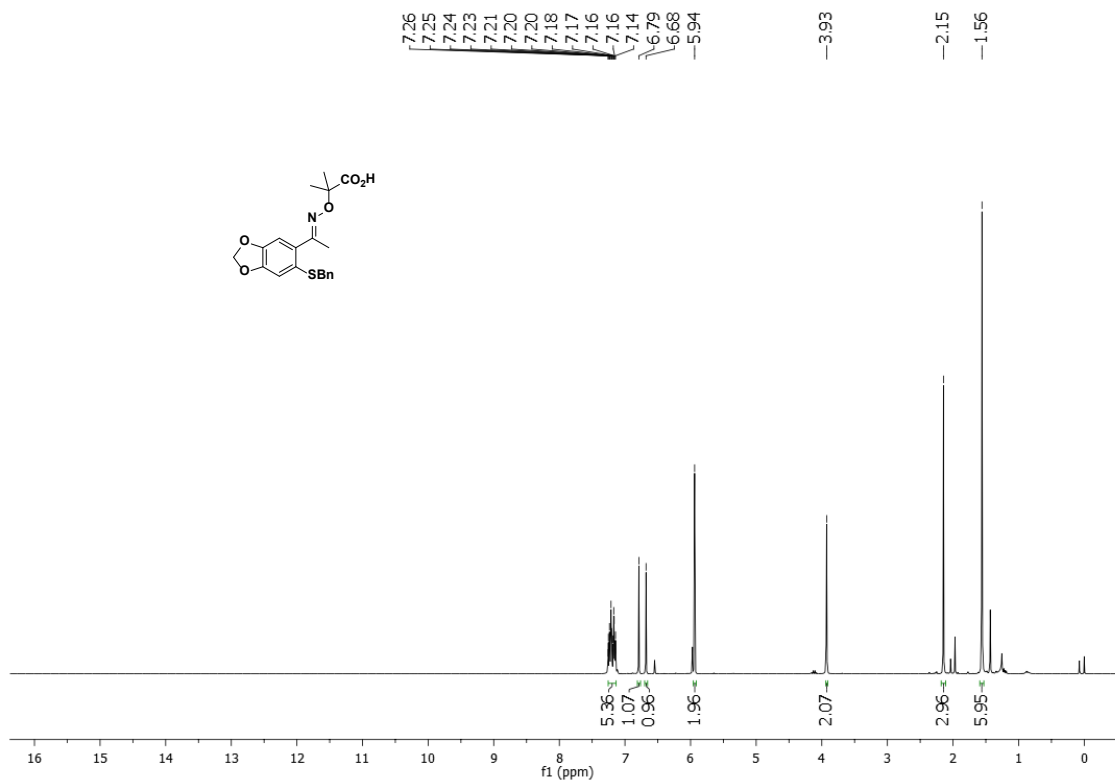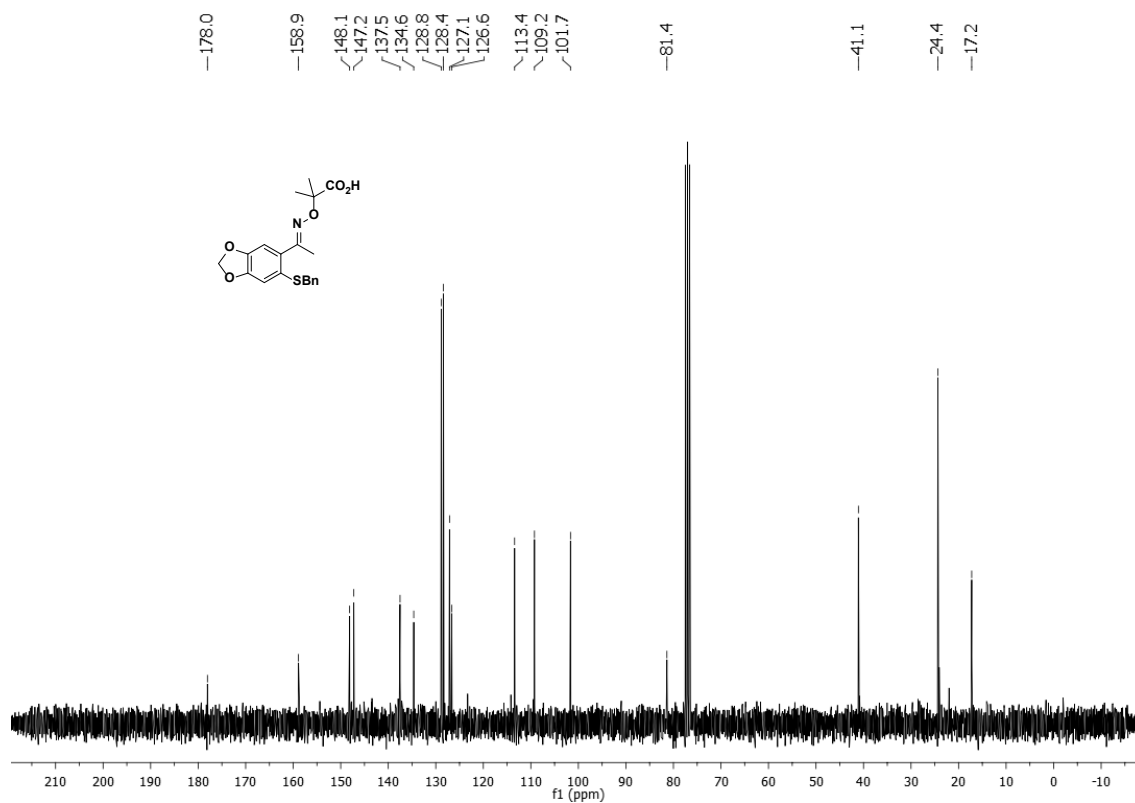

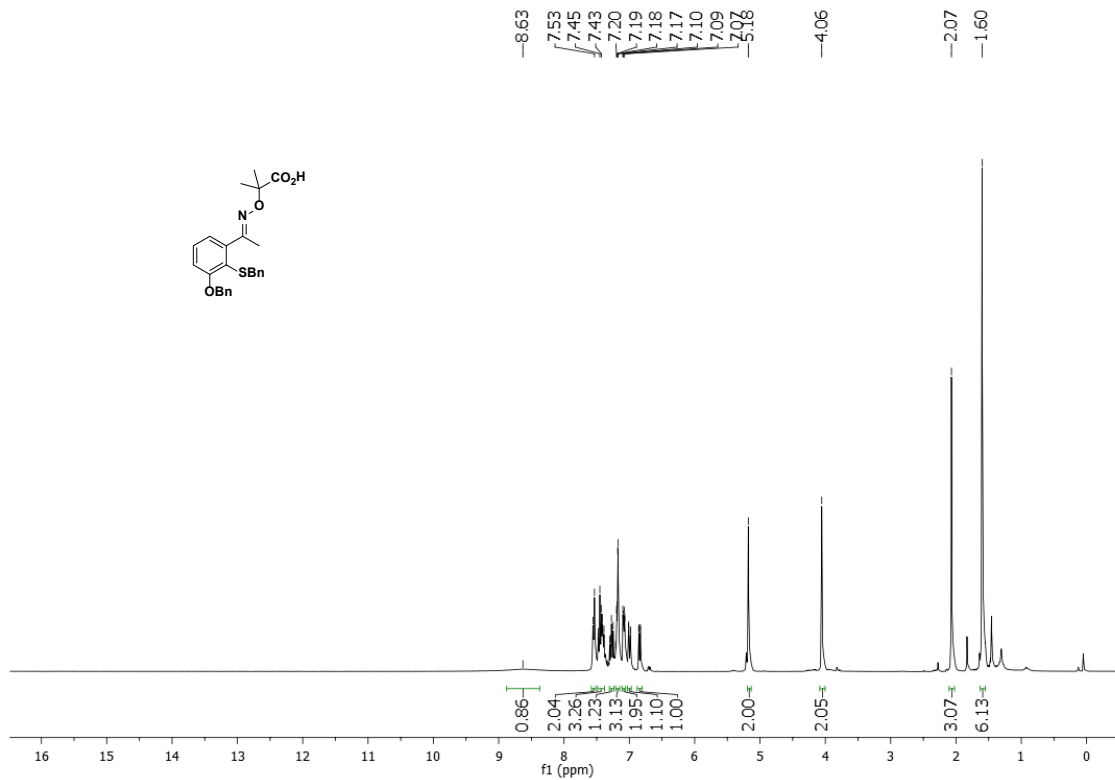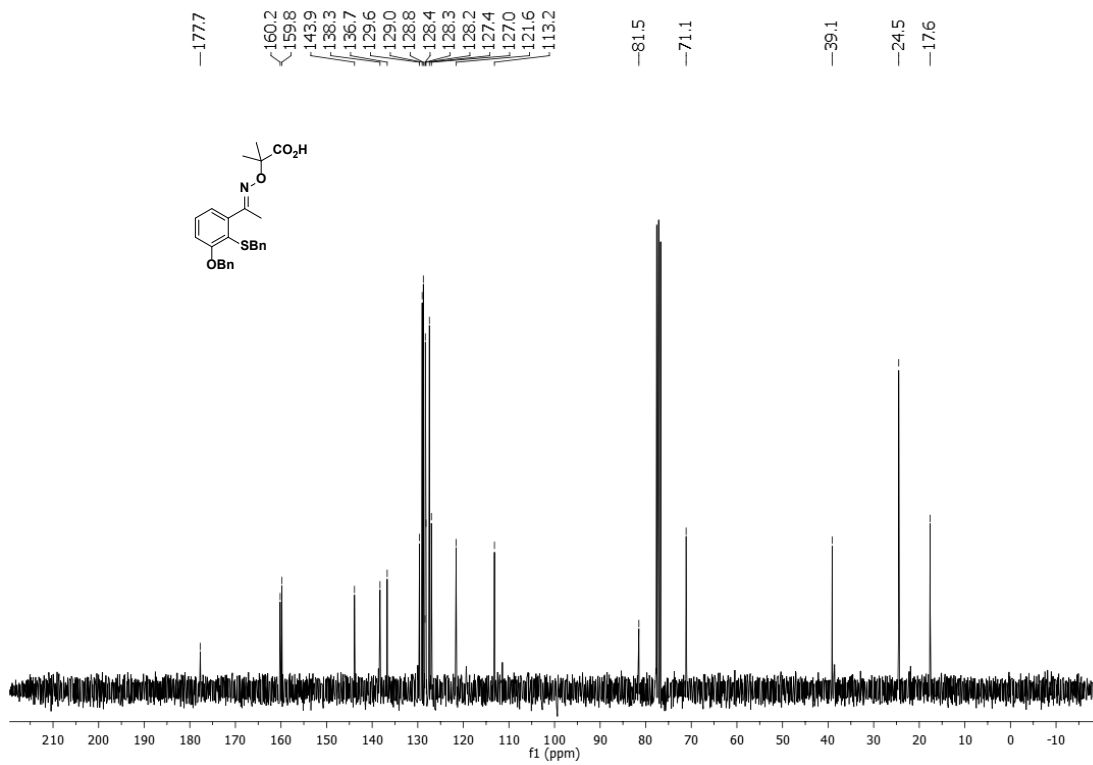

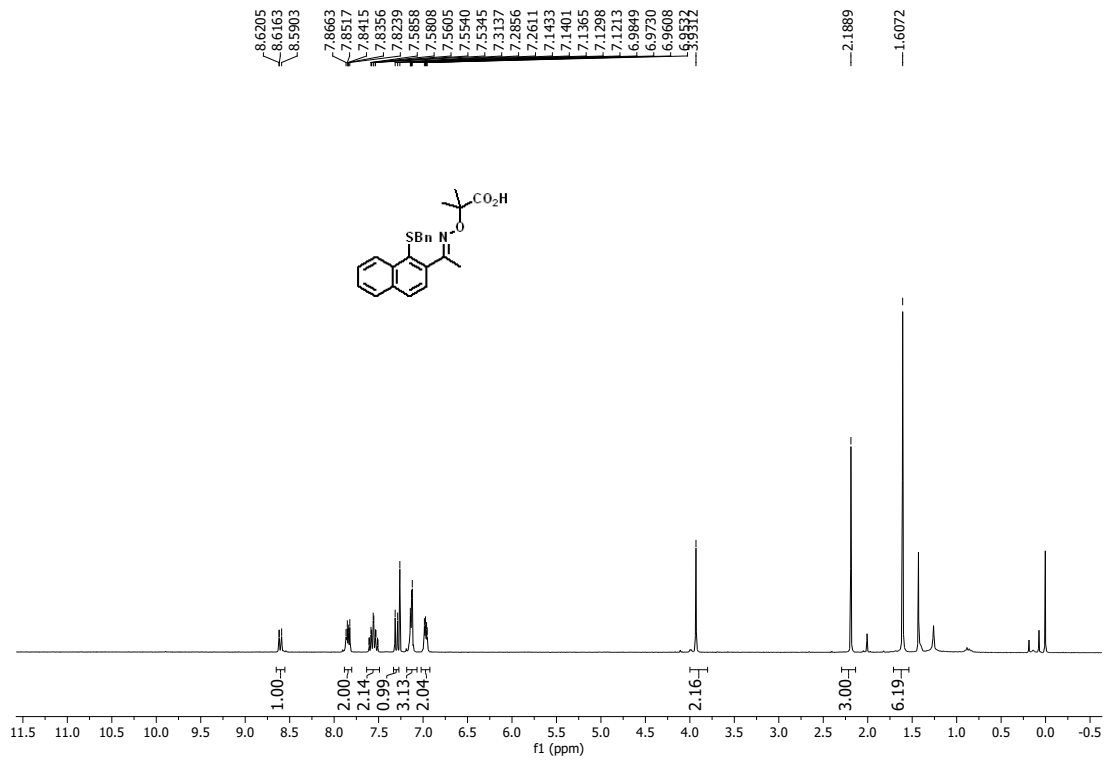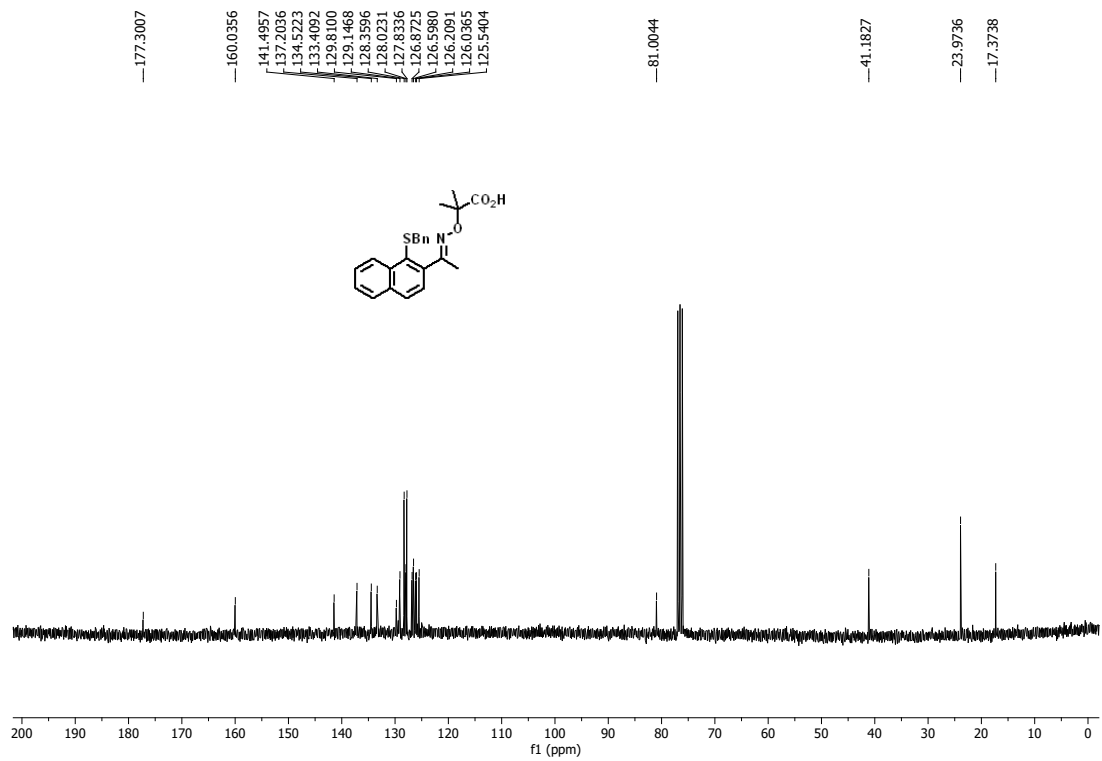

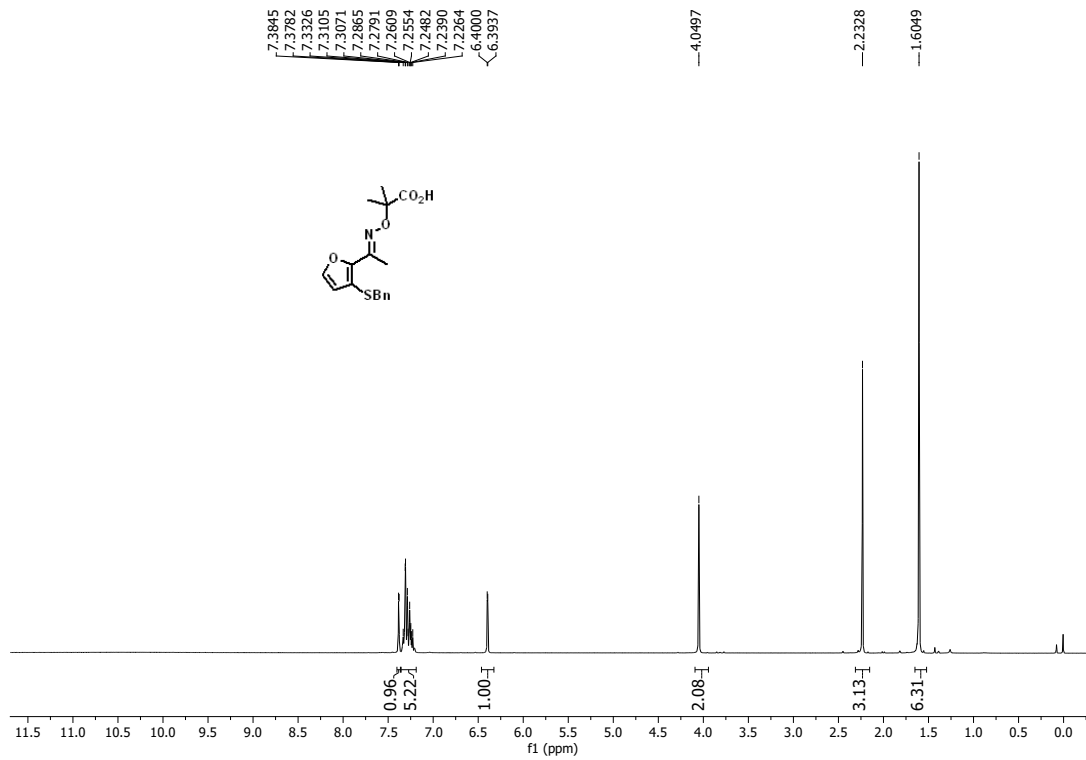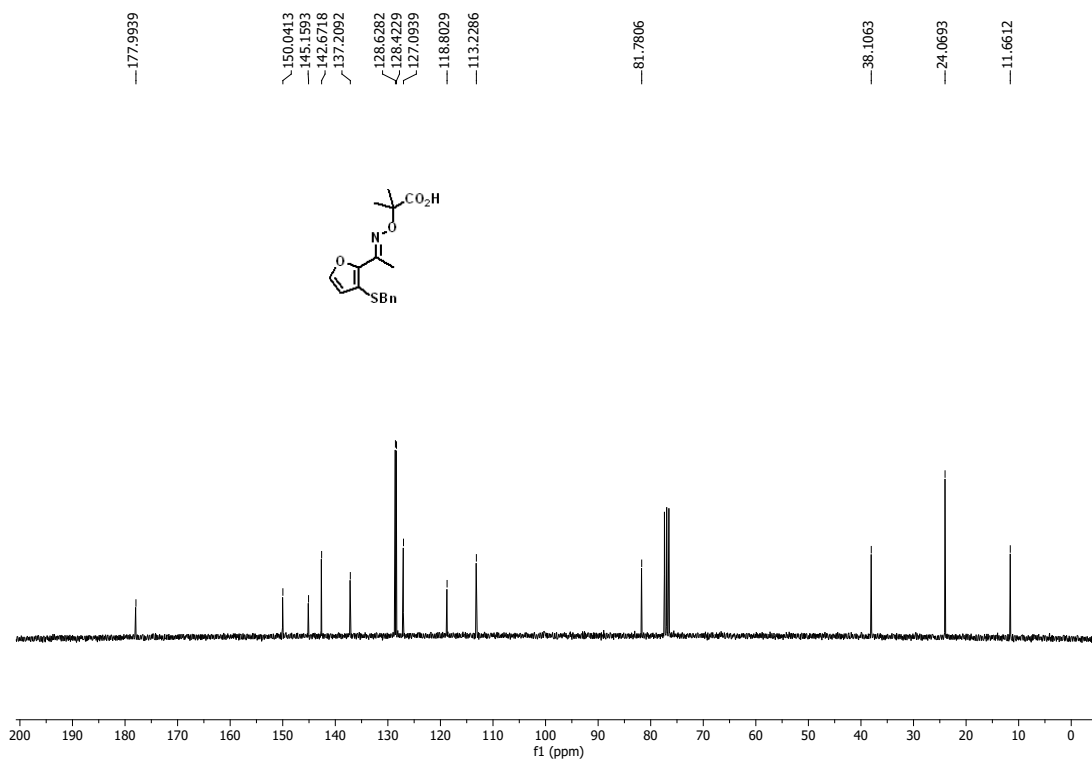



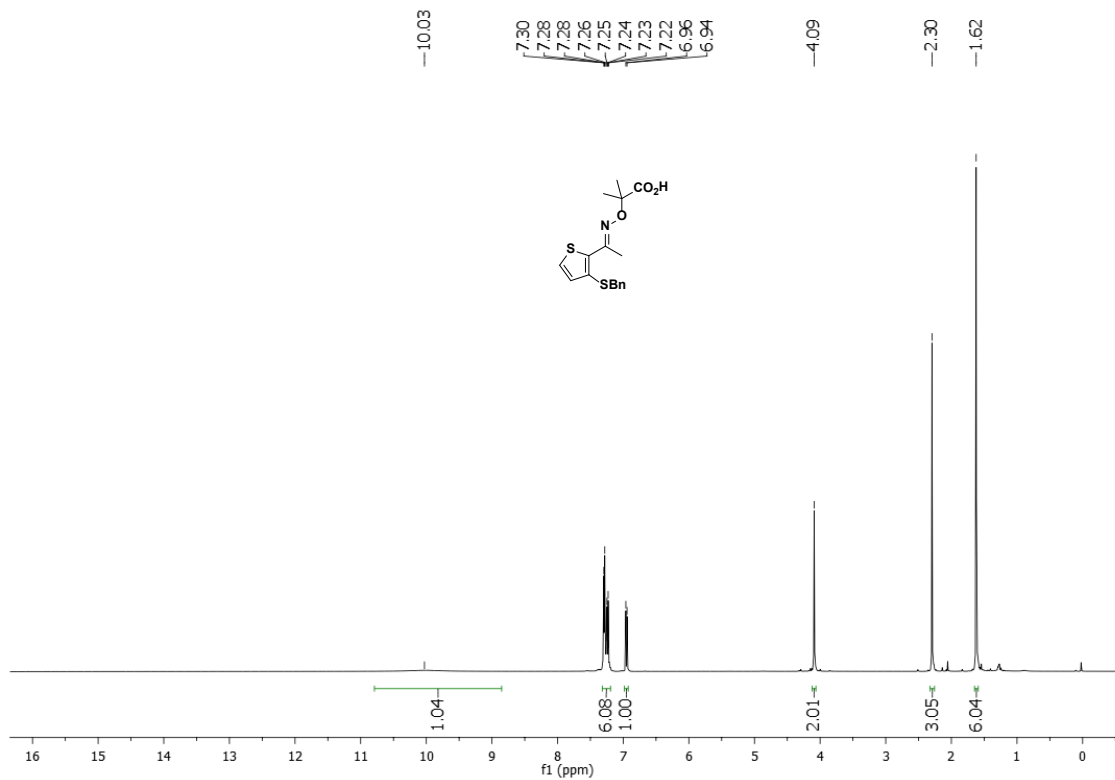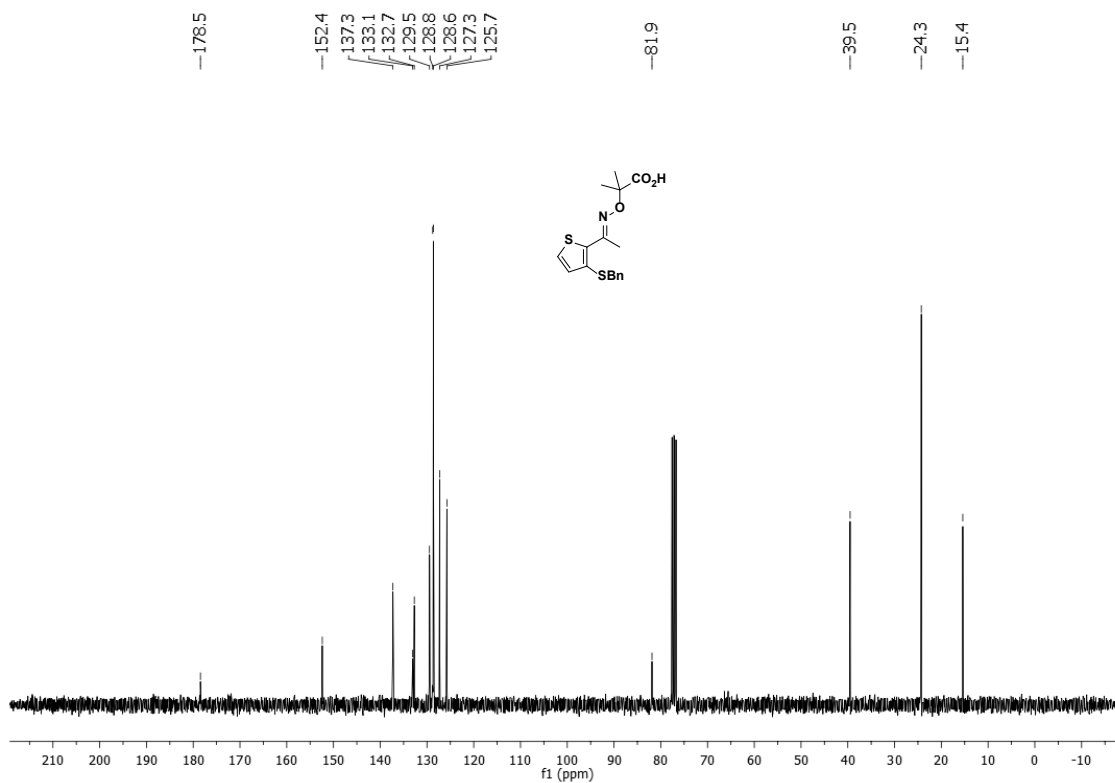

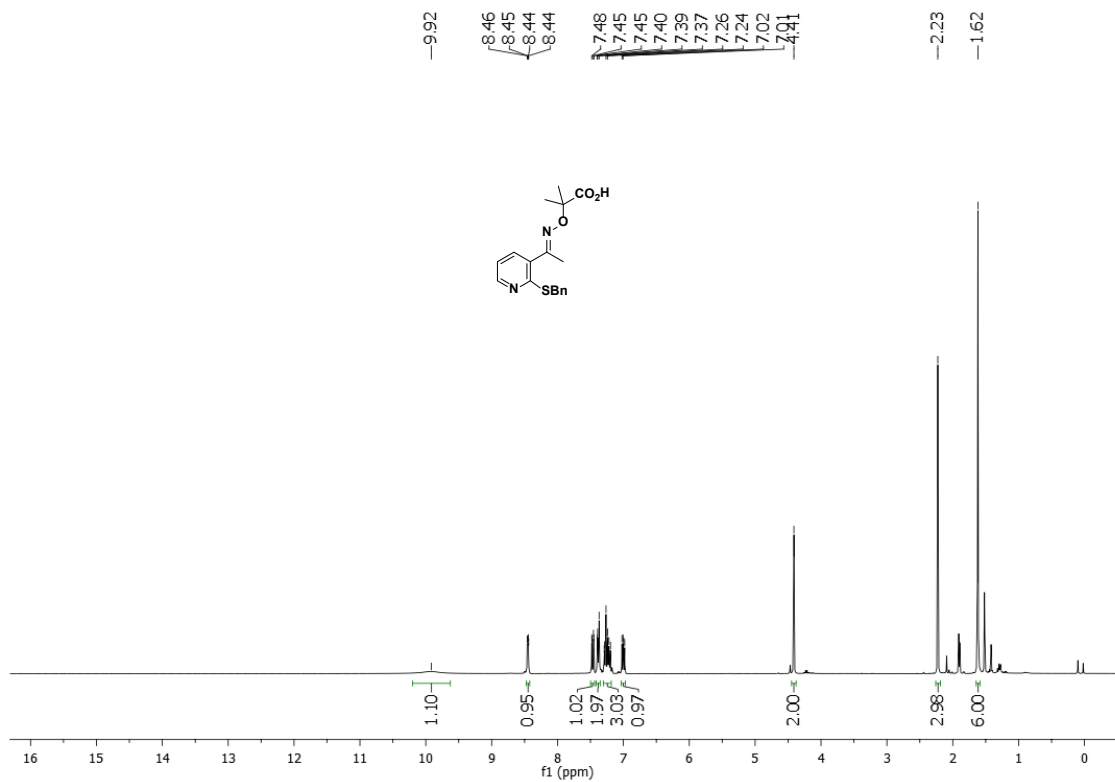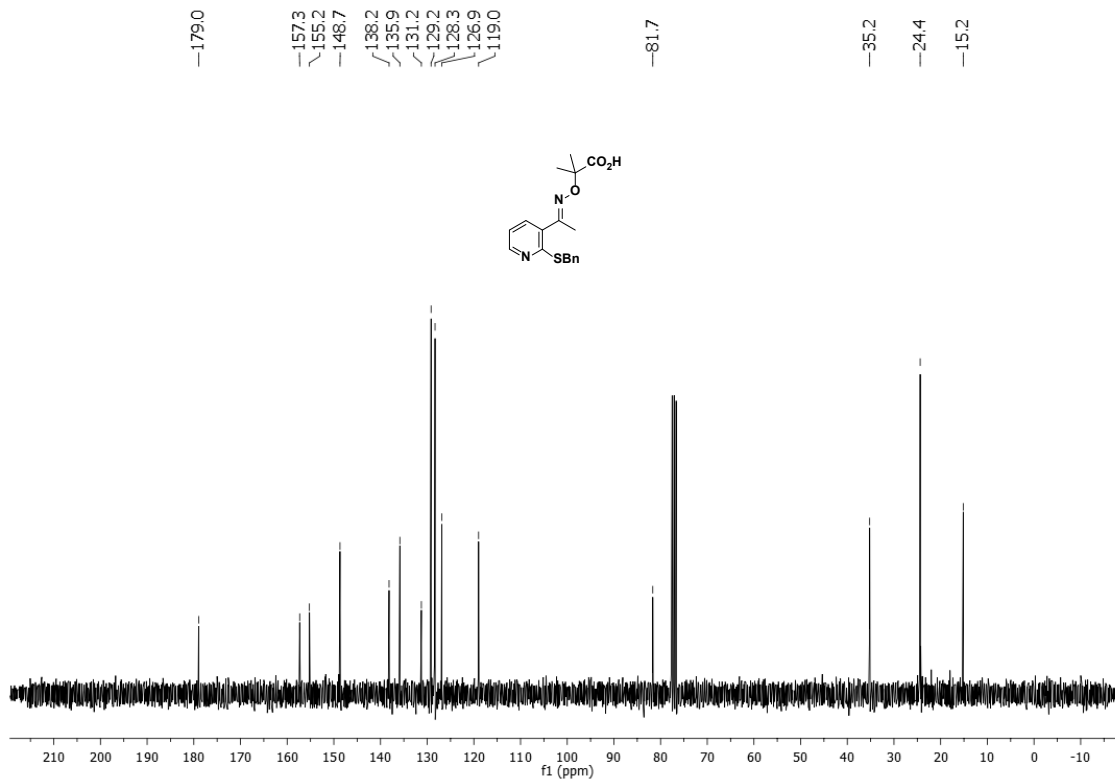

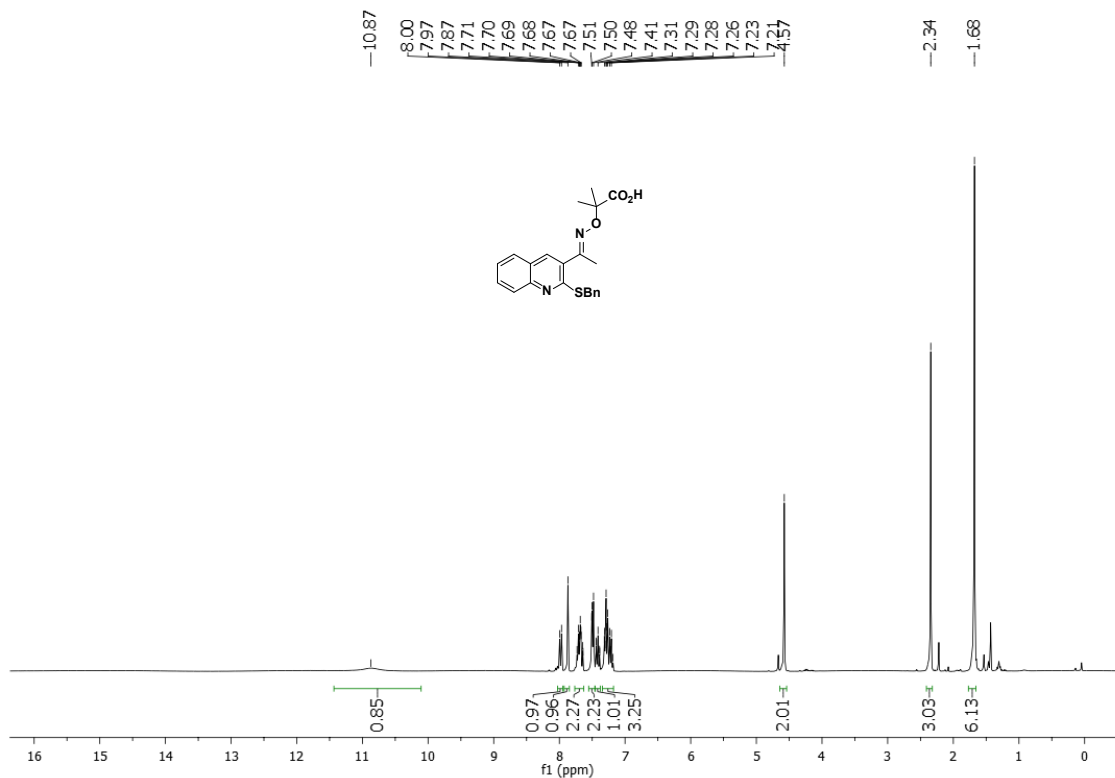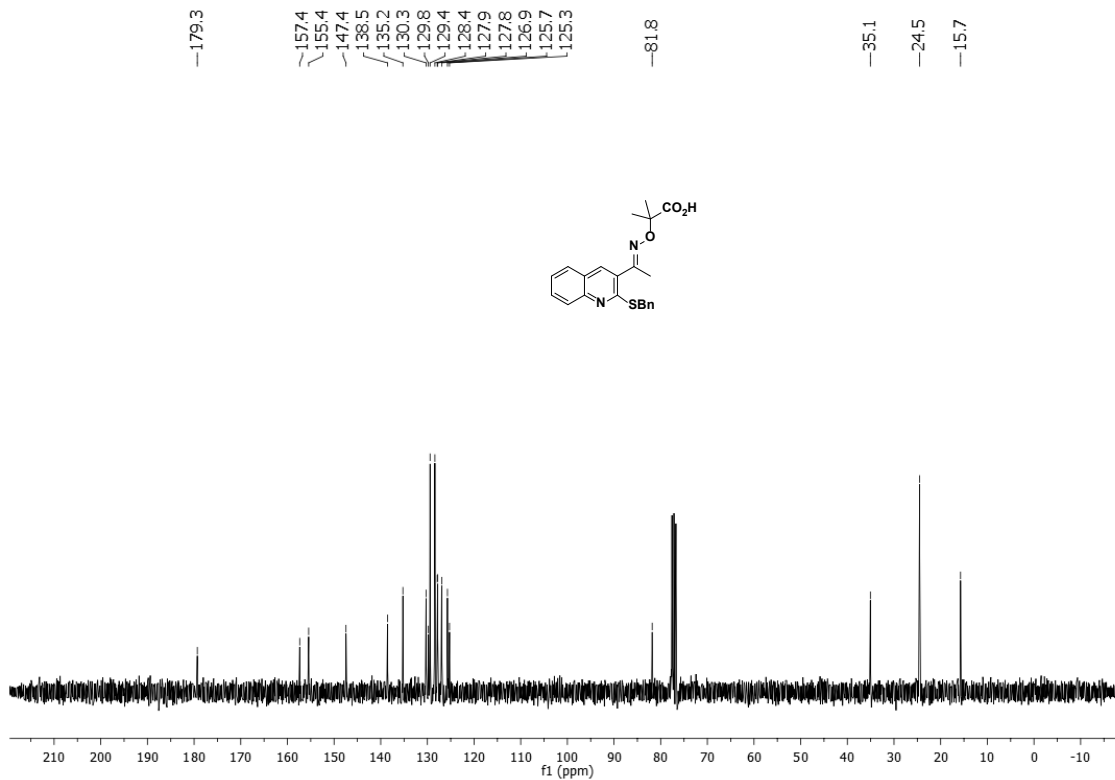

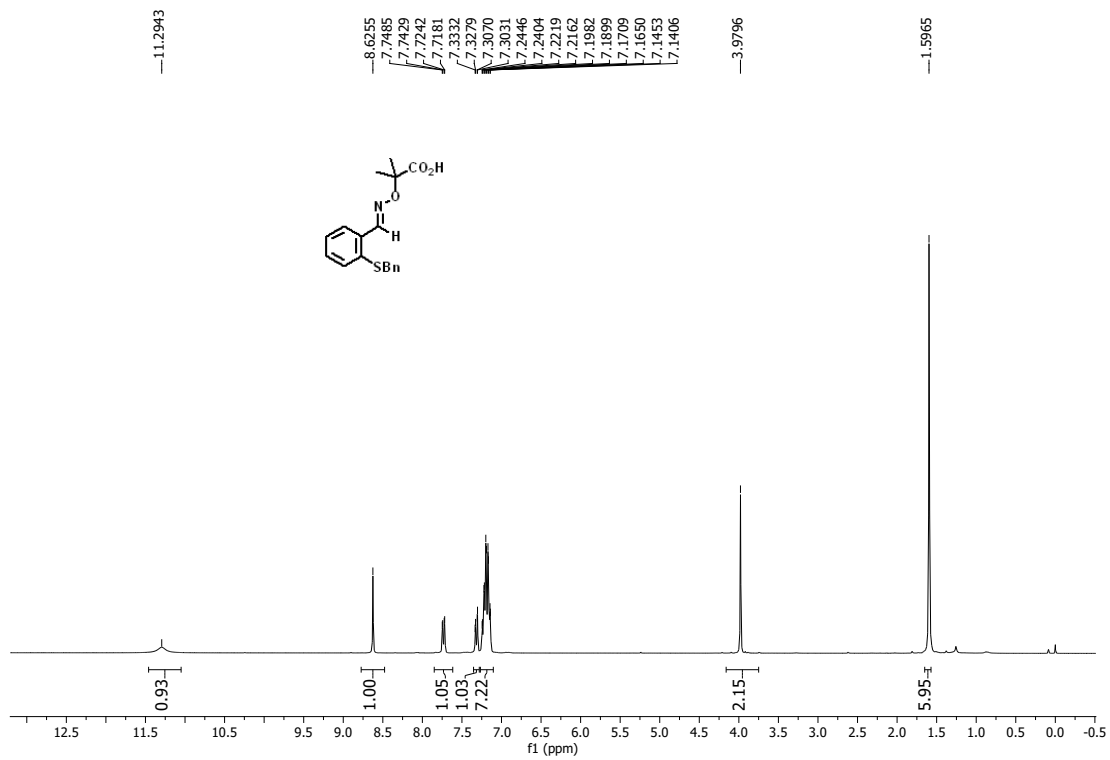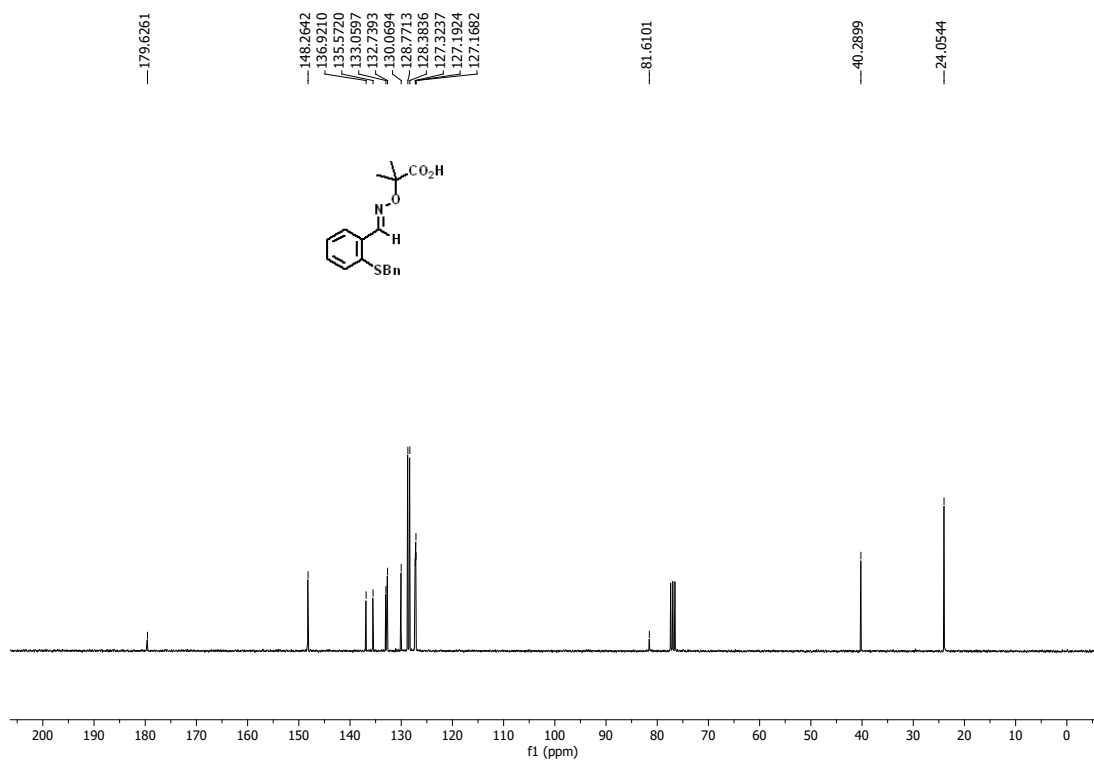

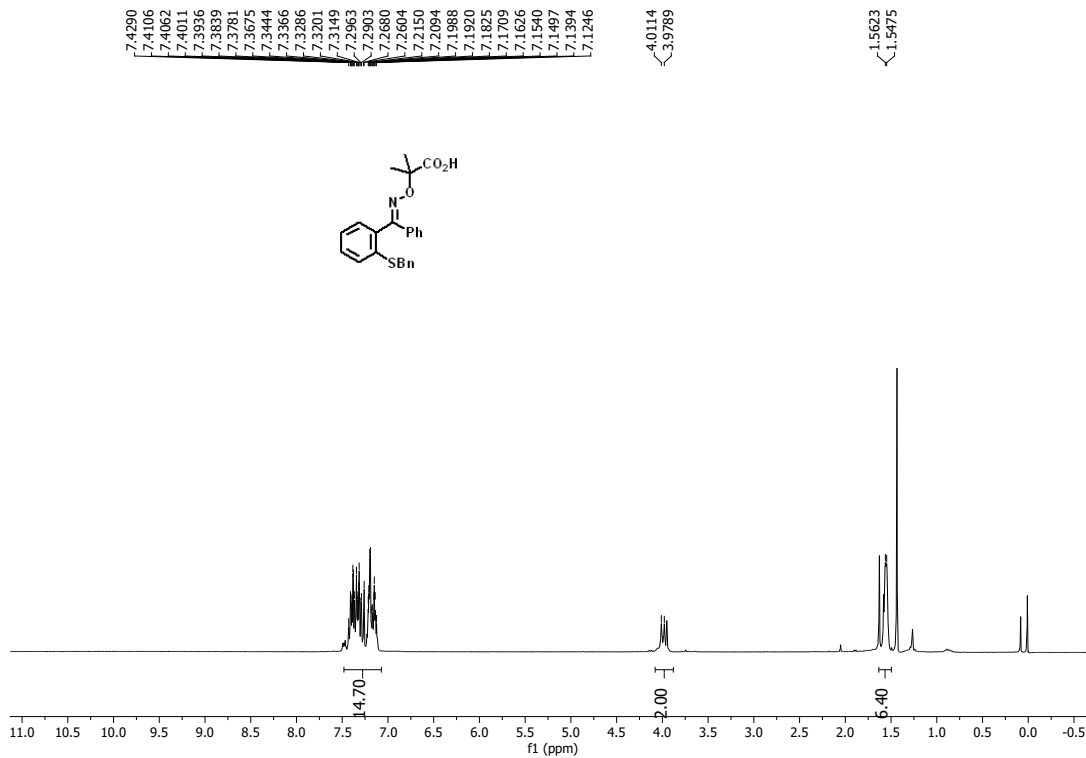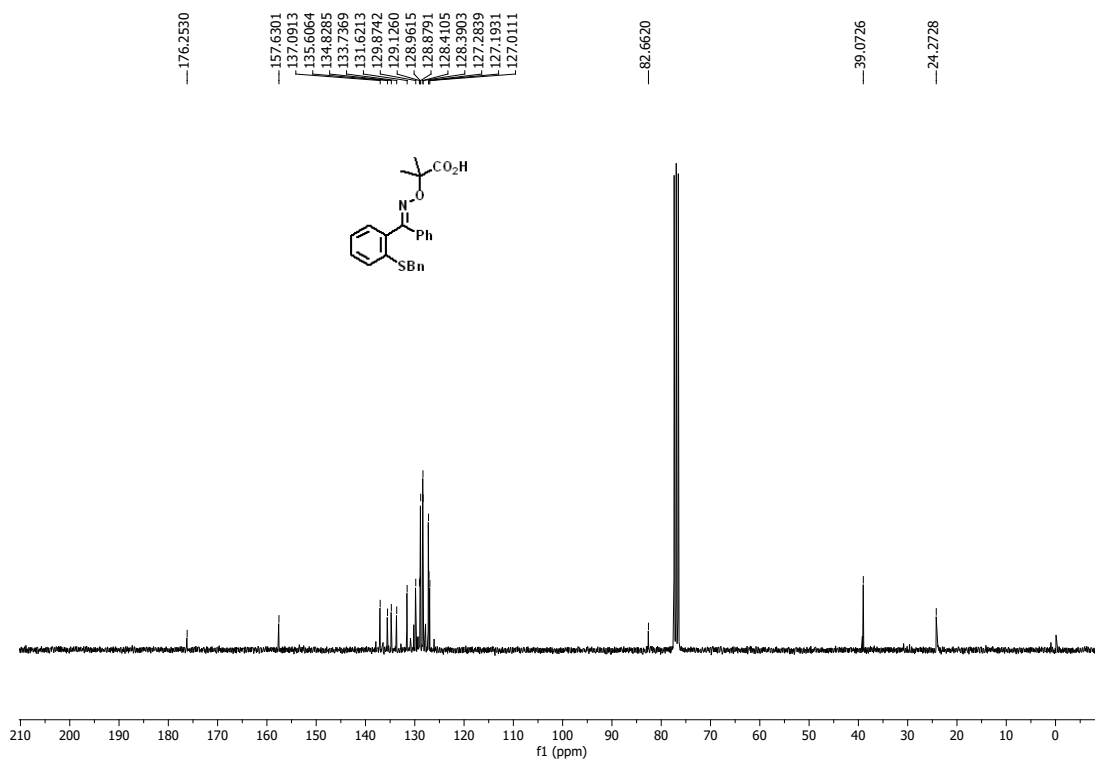

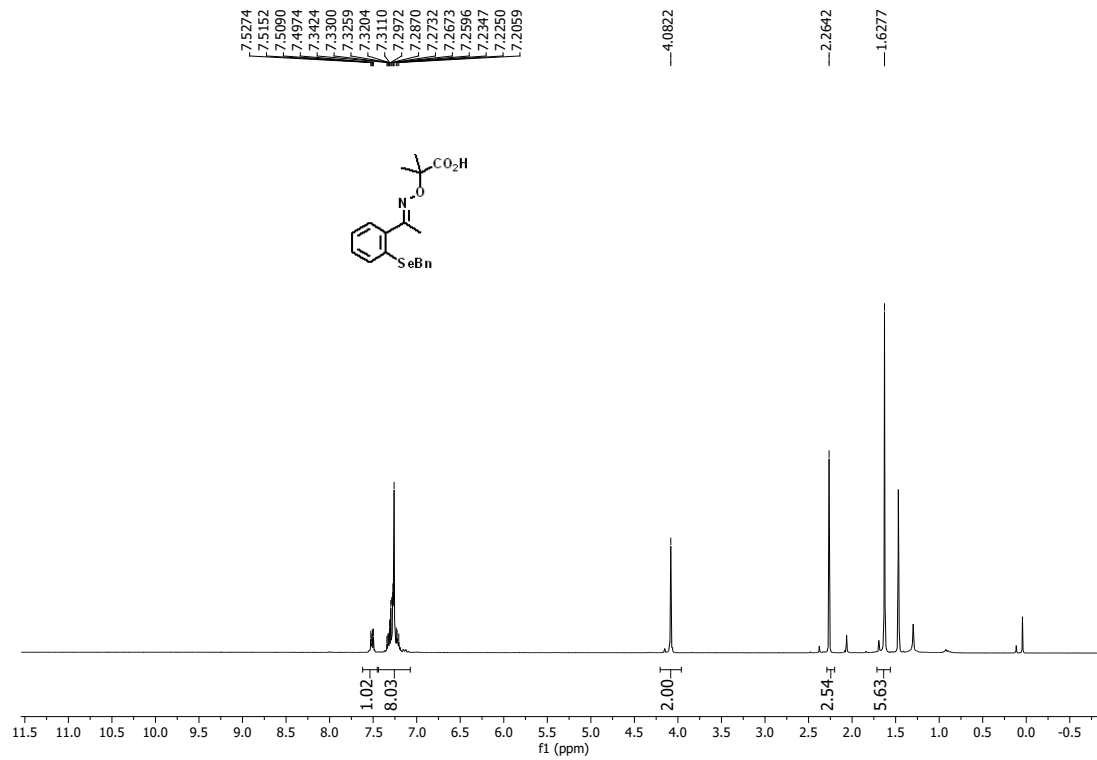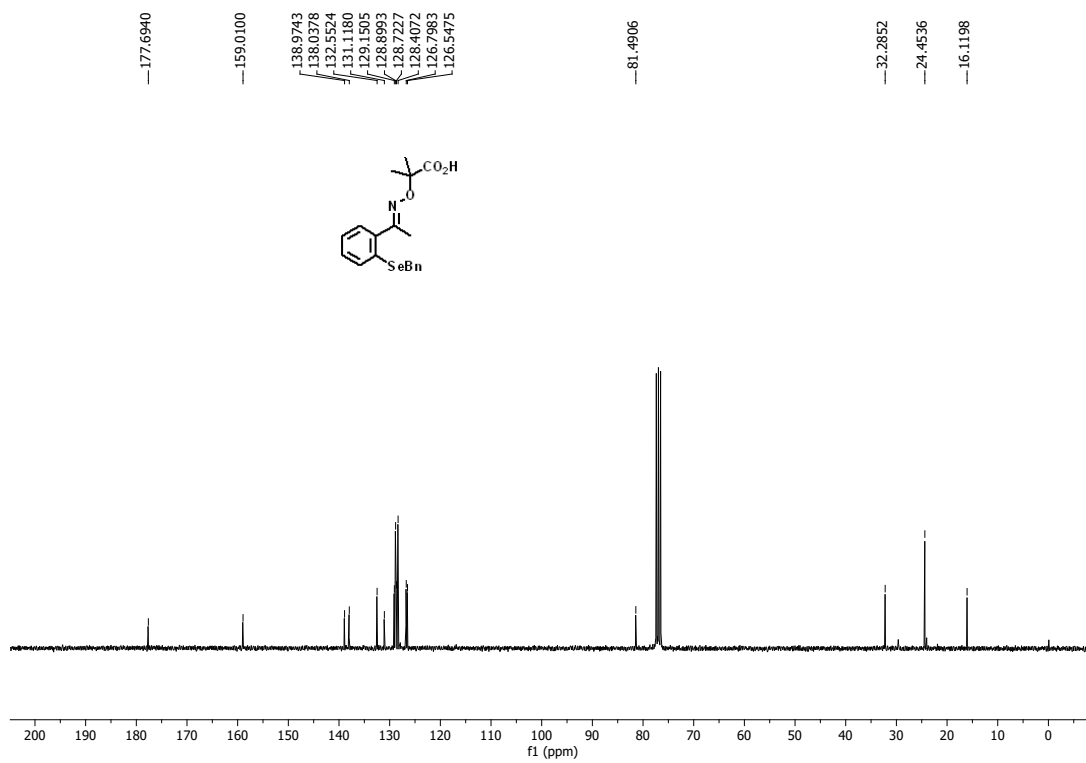

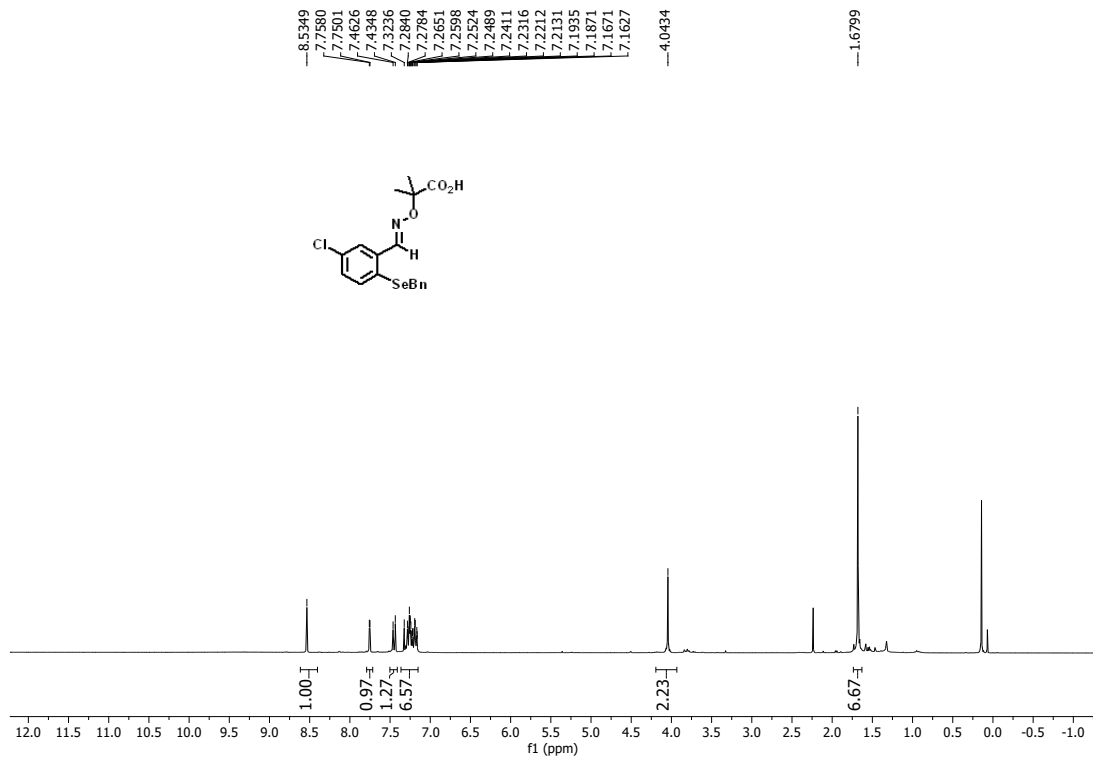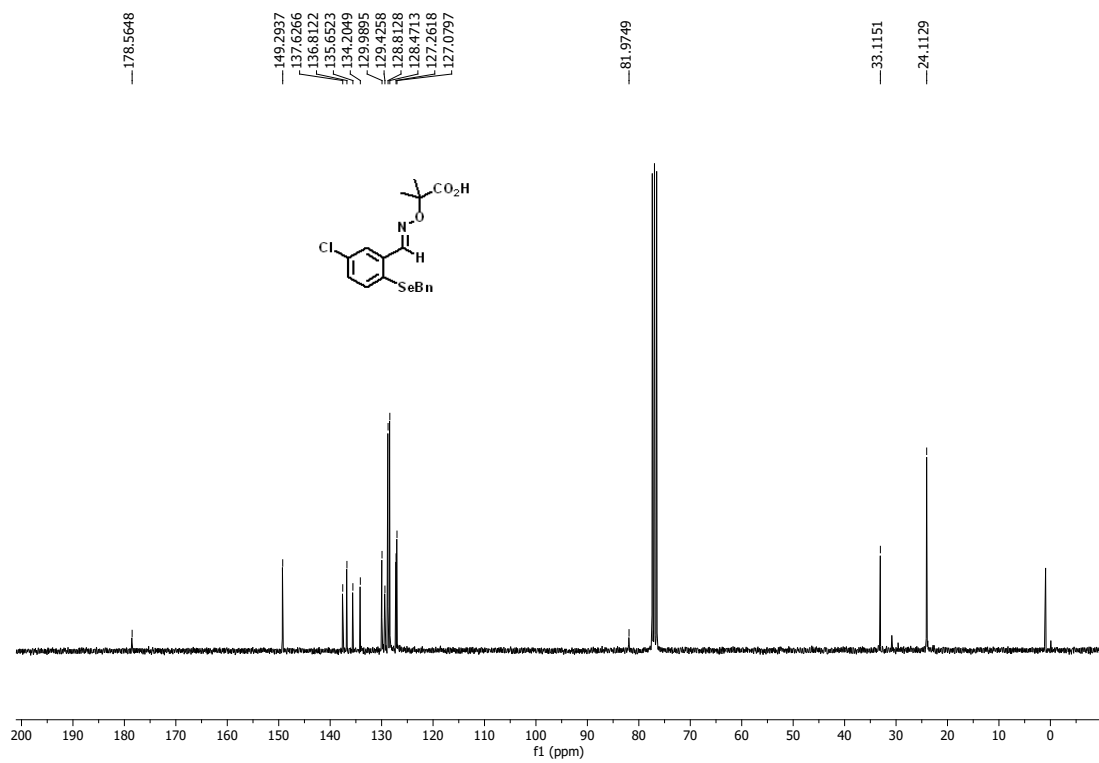

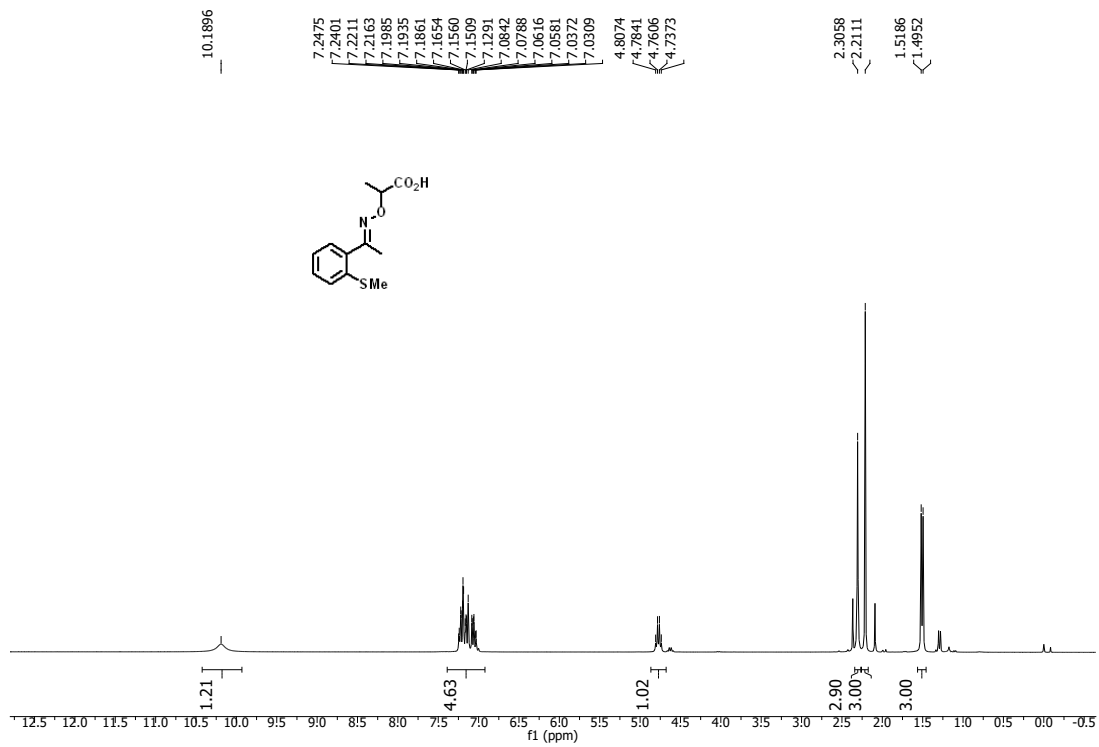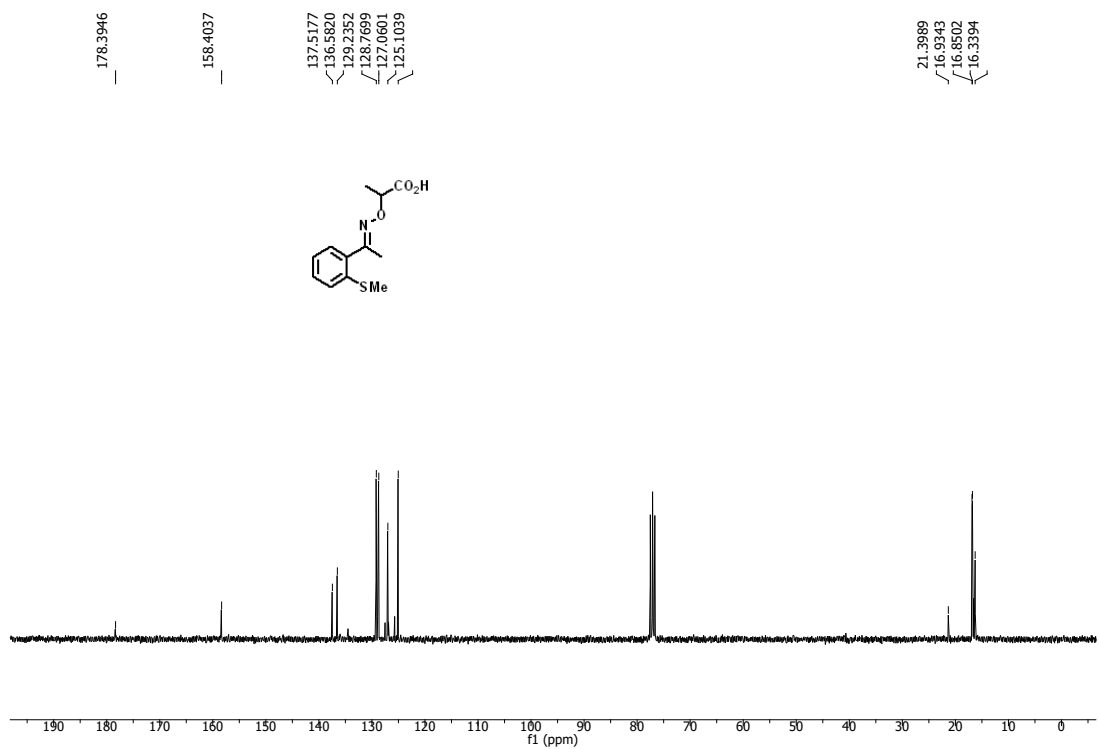



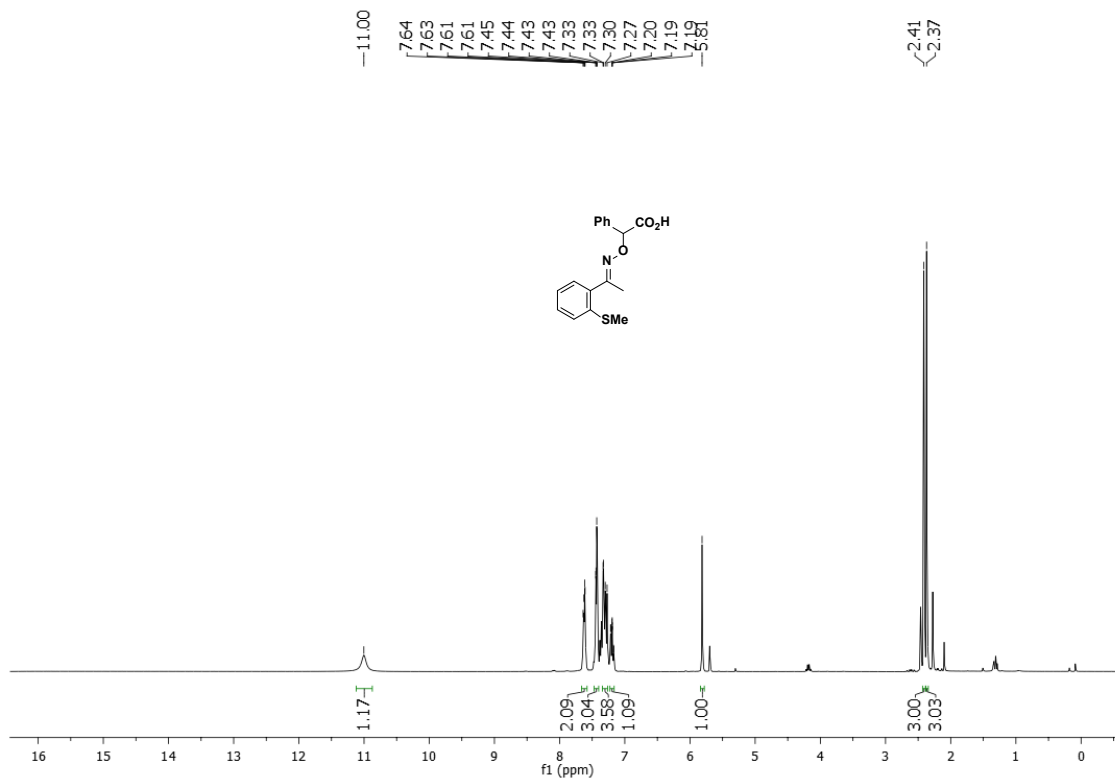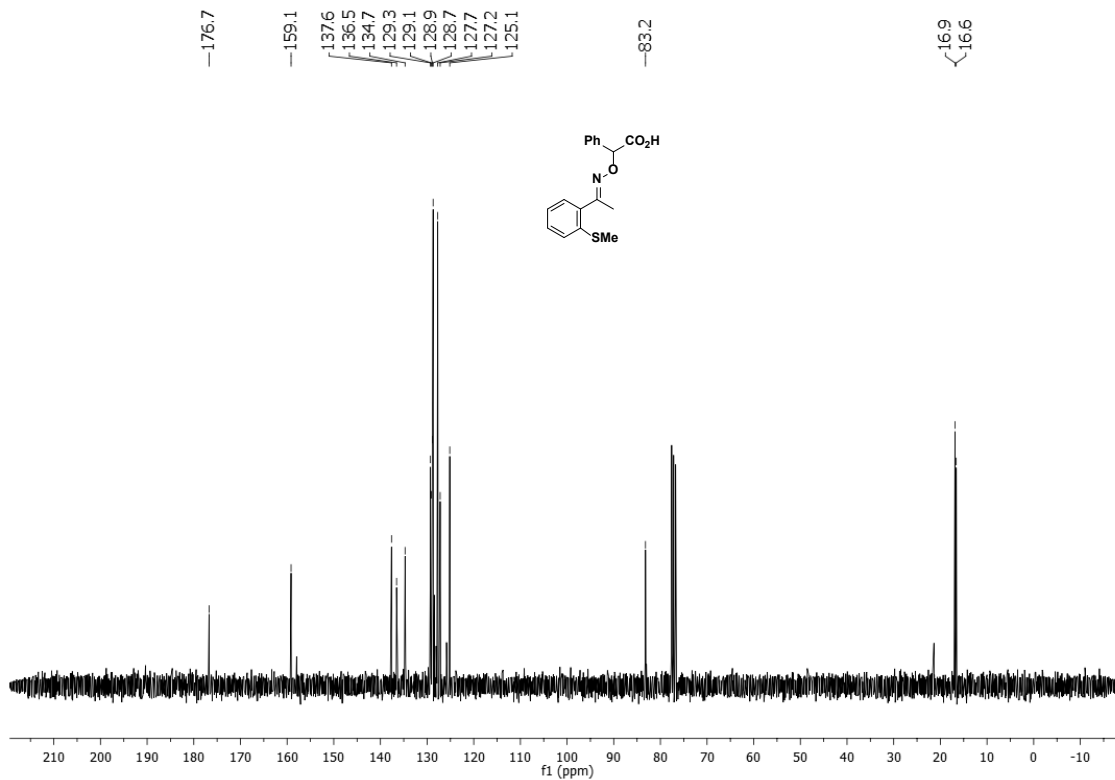

## 10.4. NMR Spectra of Isothiazoles 2

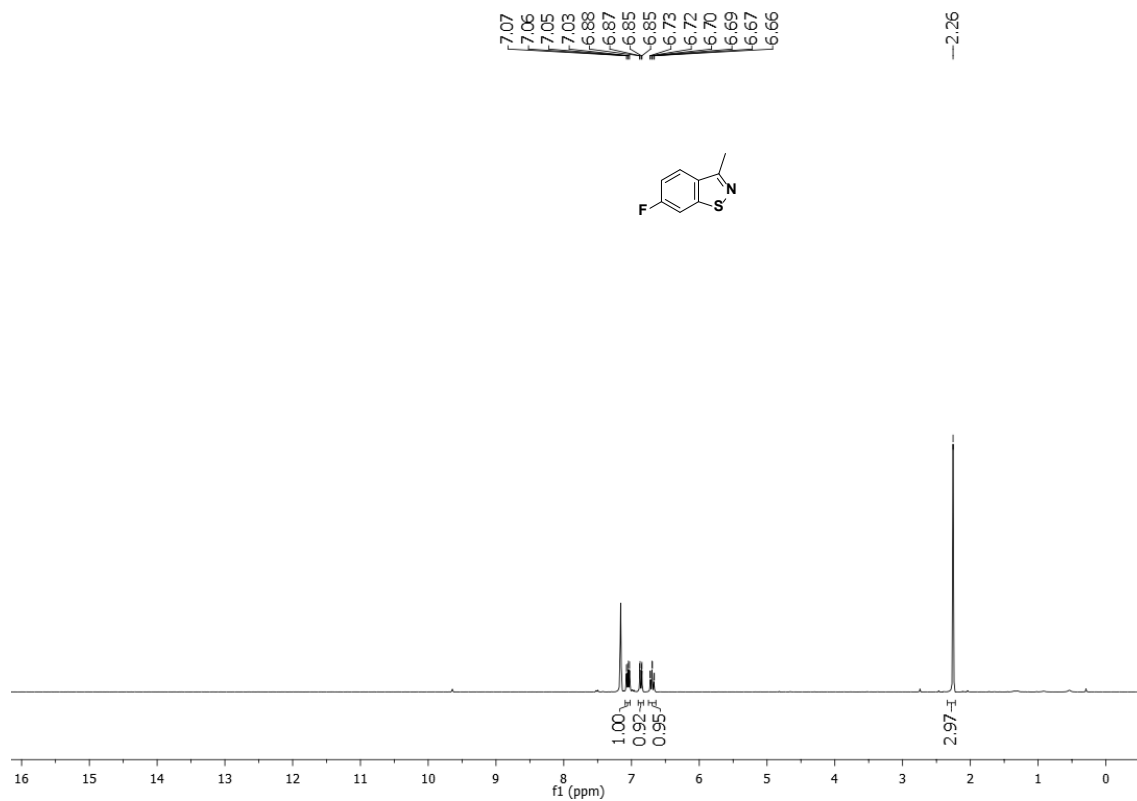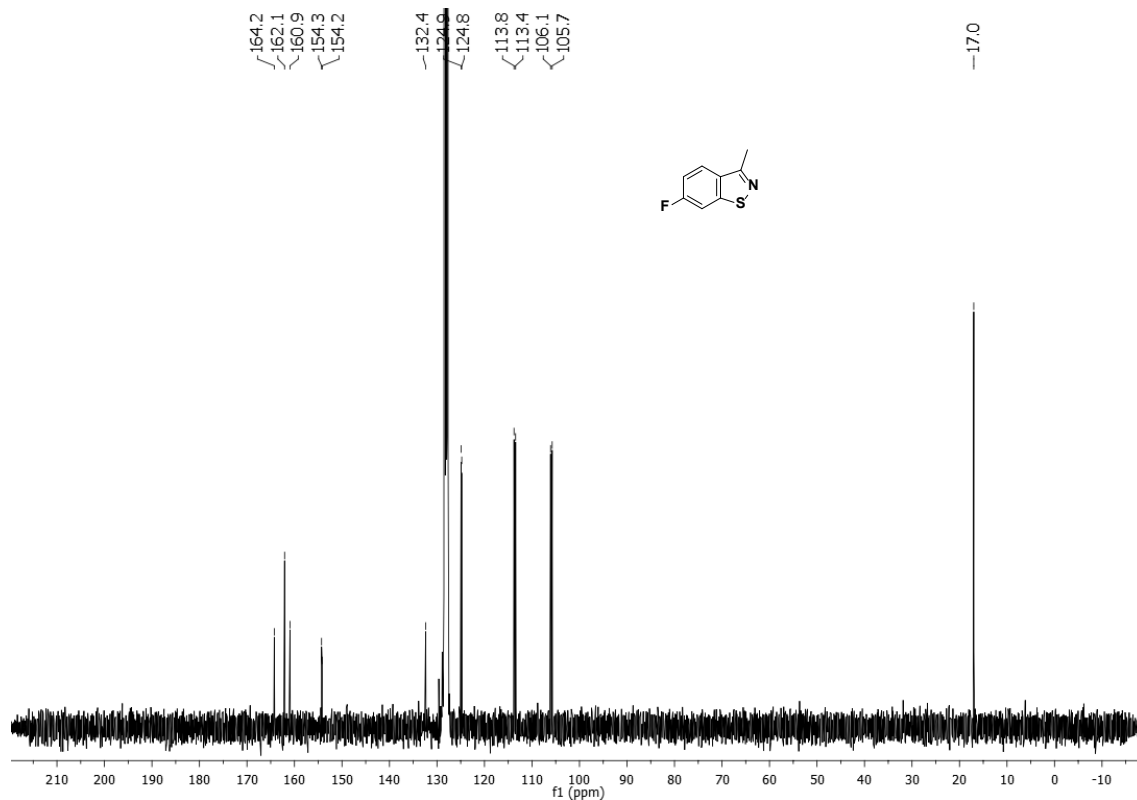

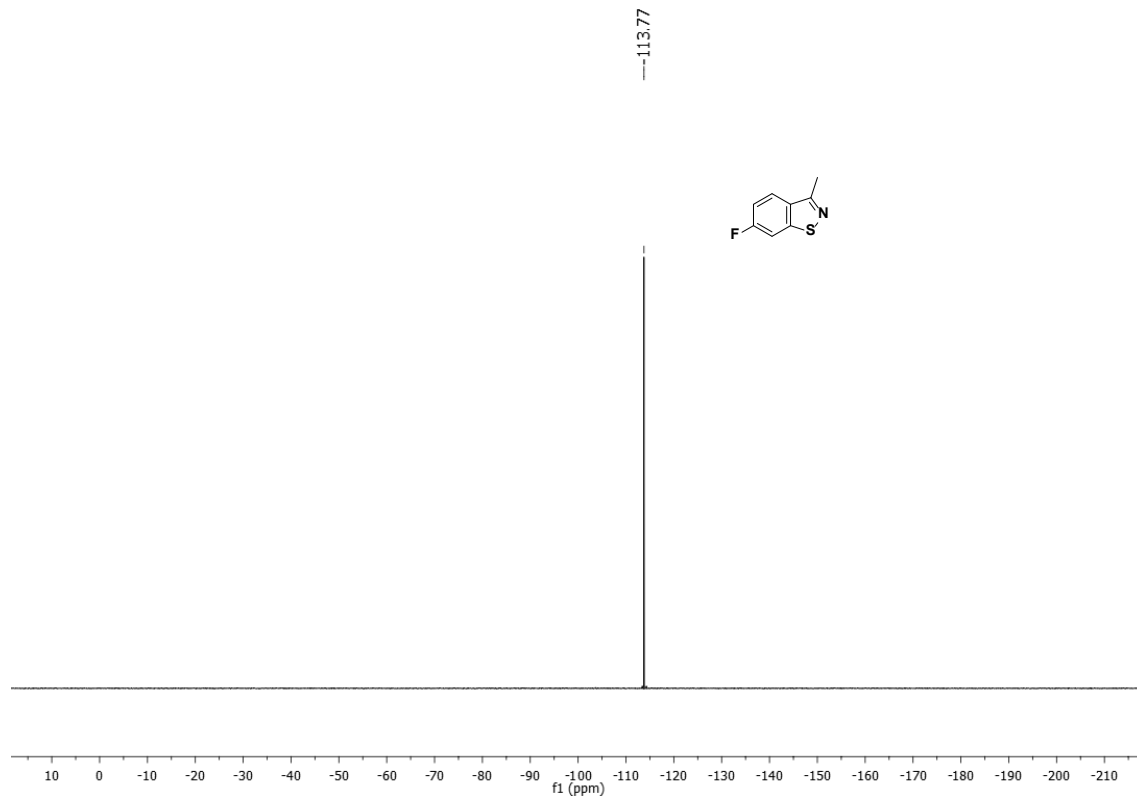

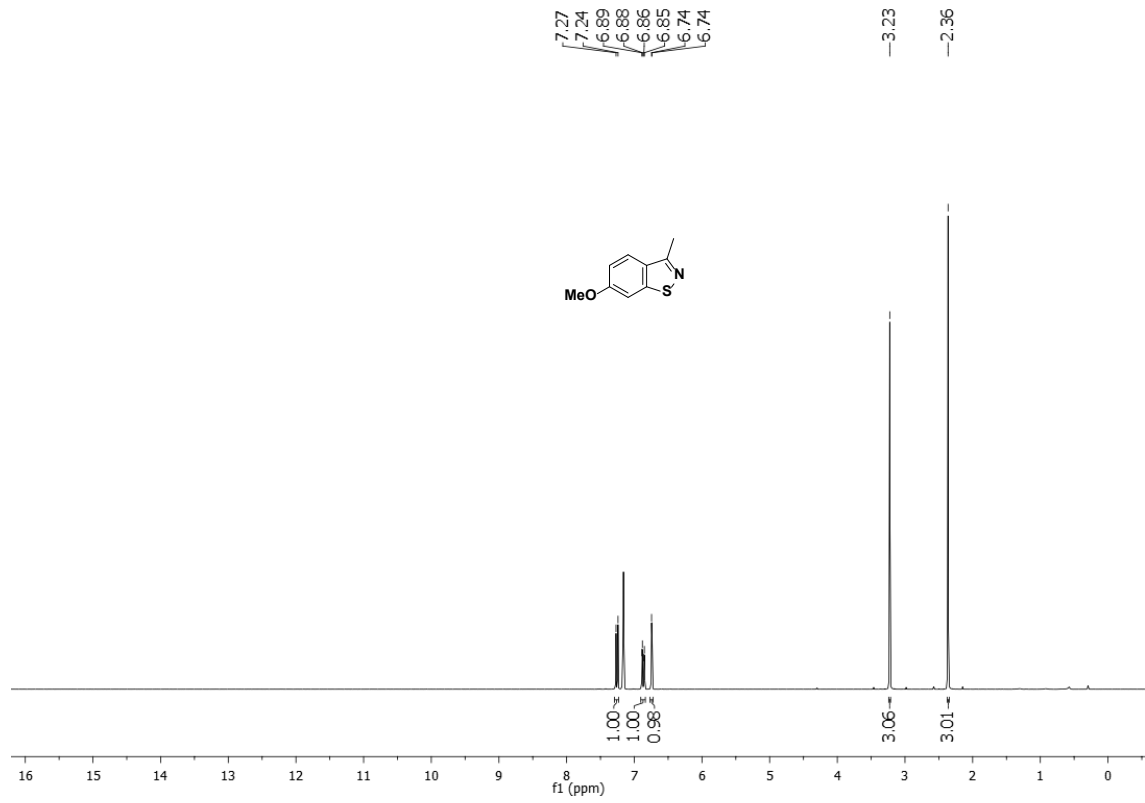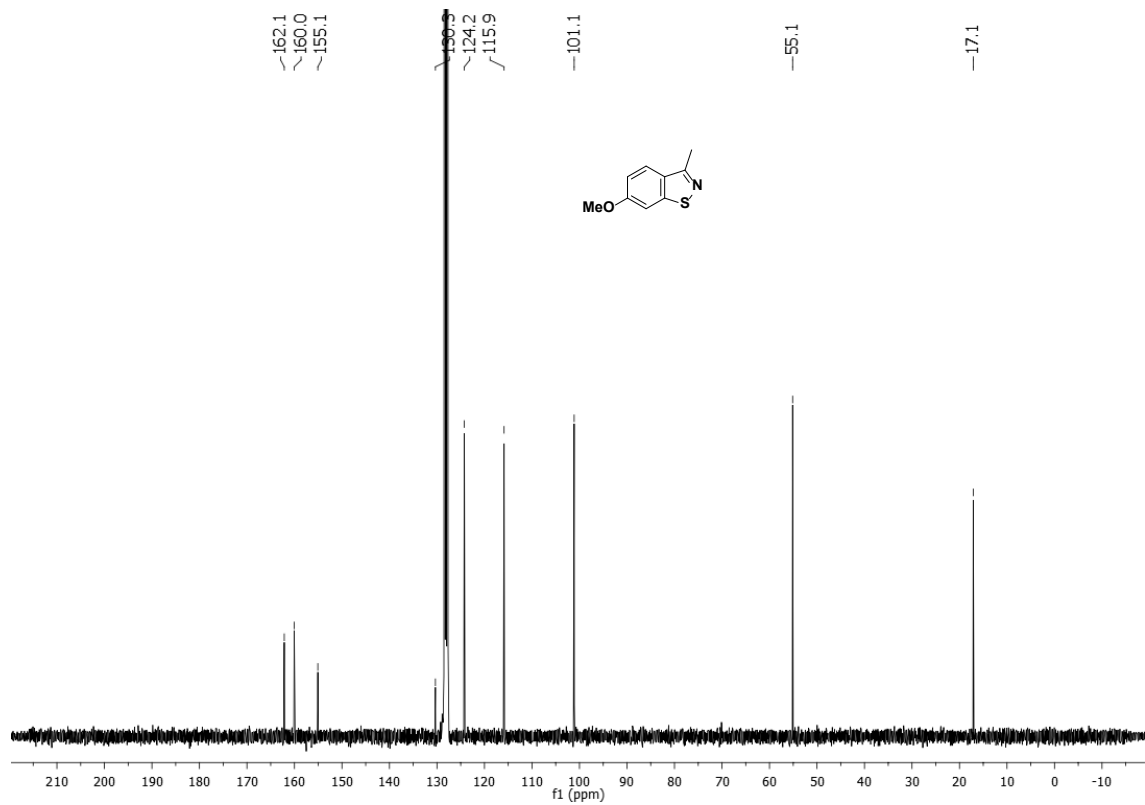

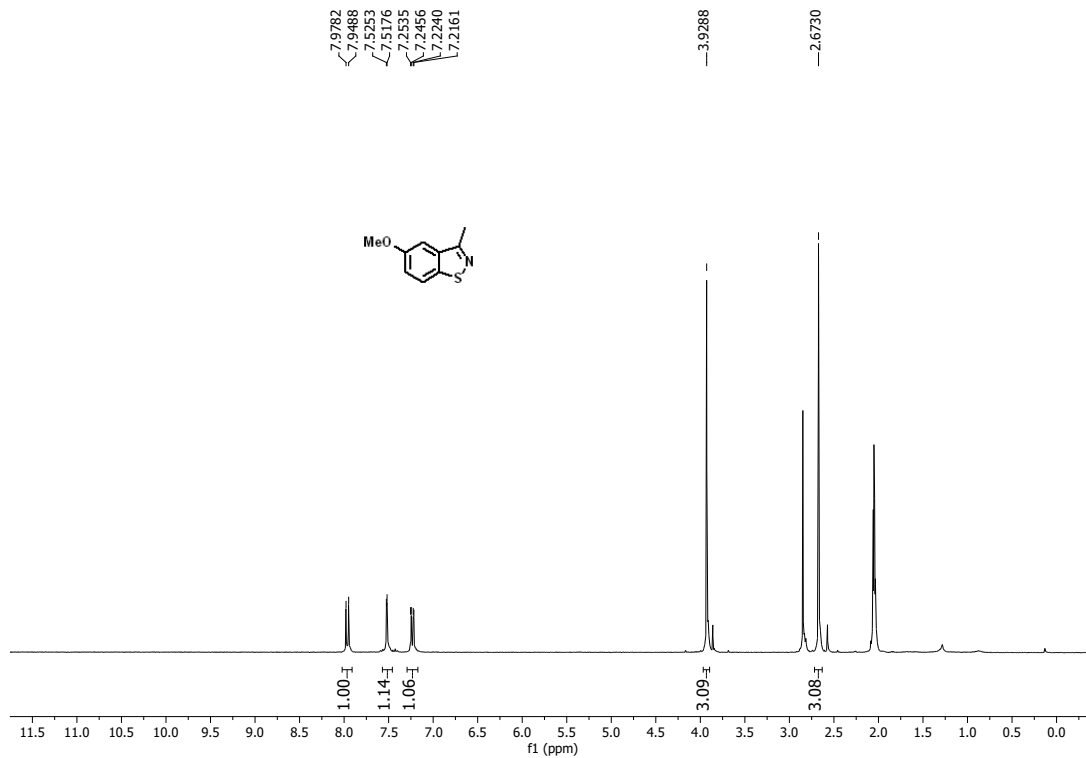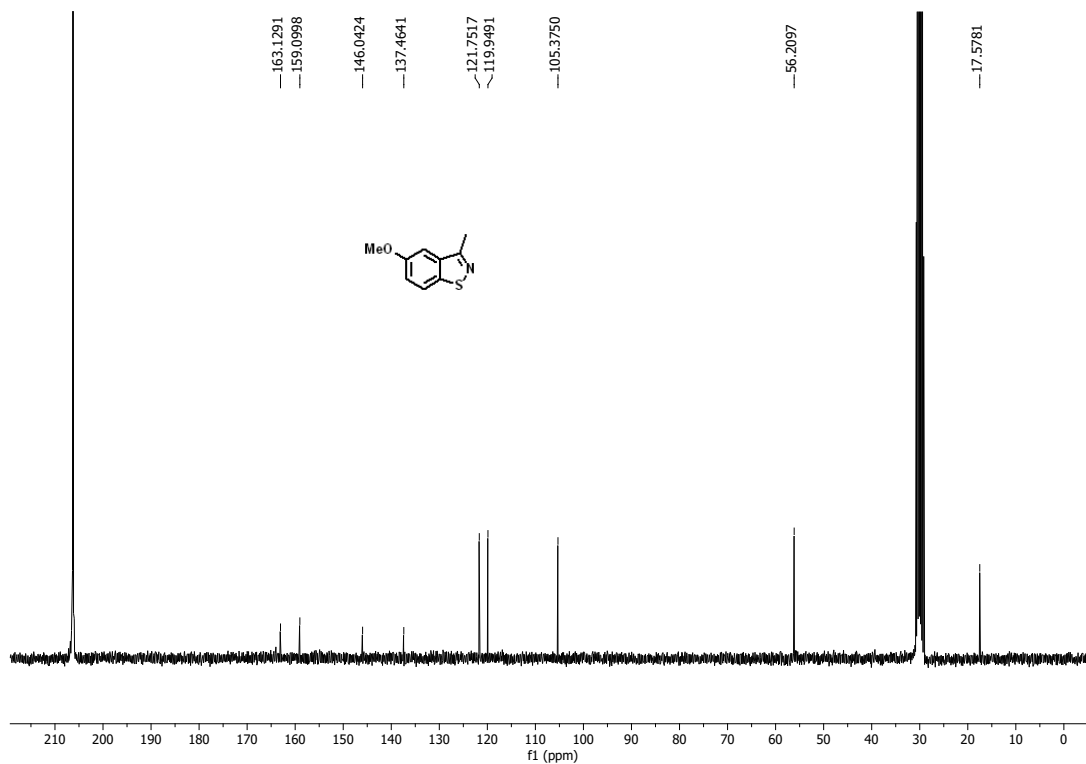

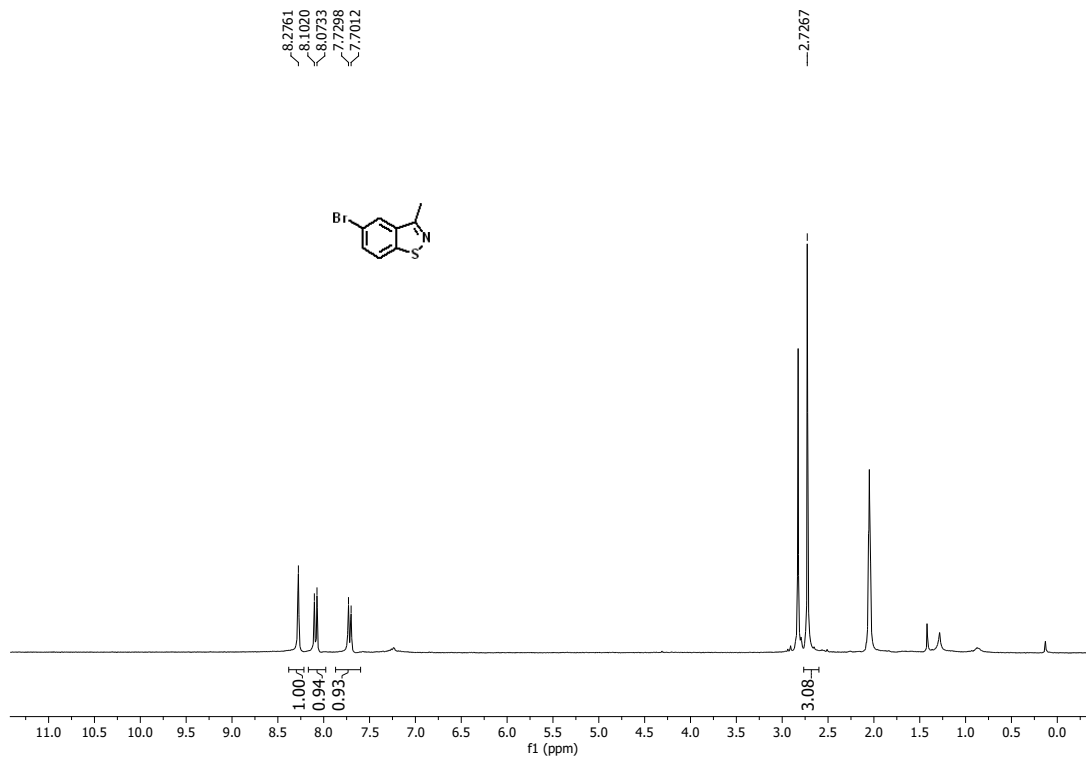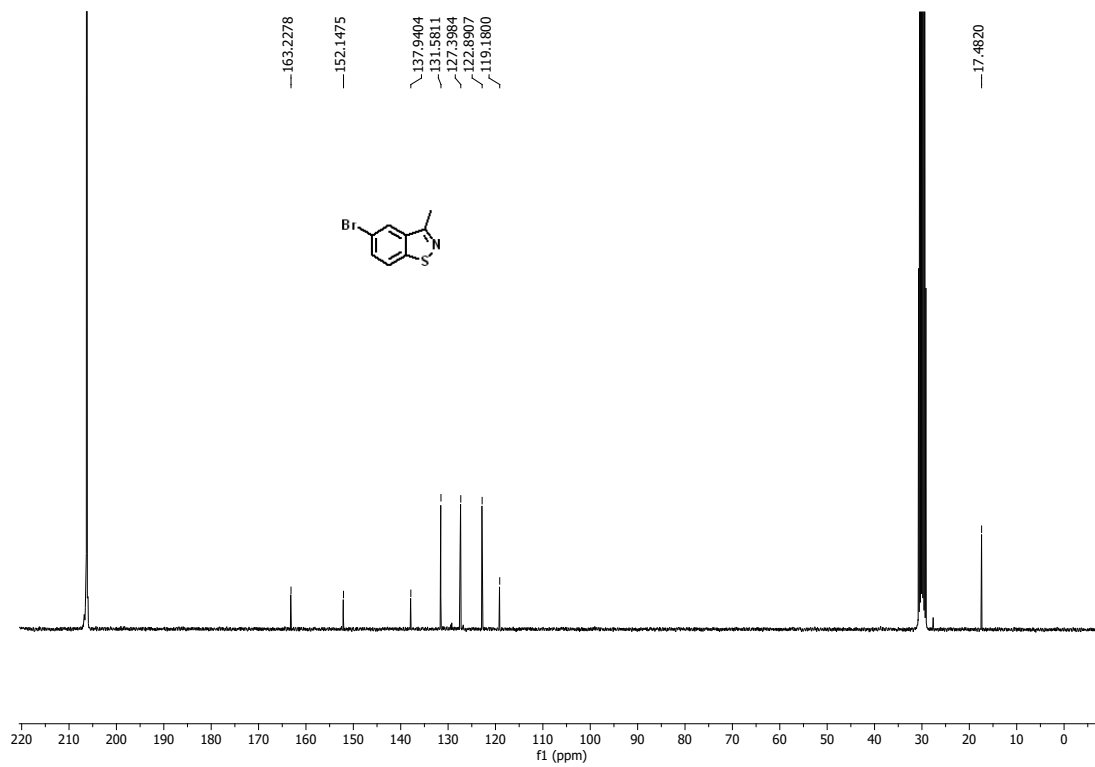

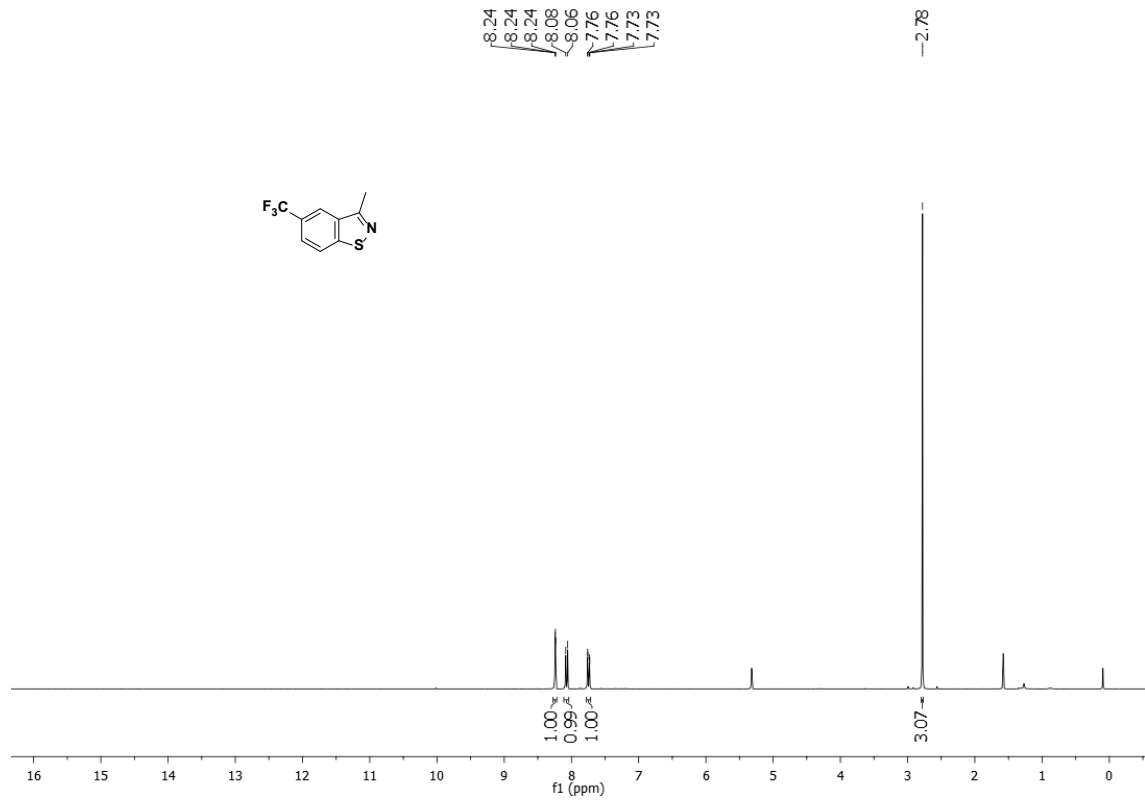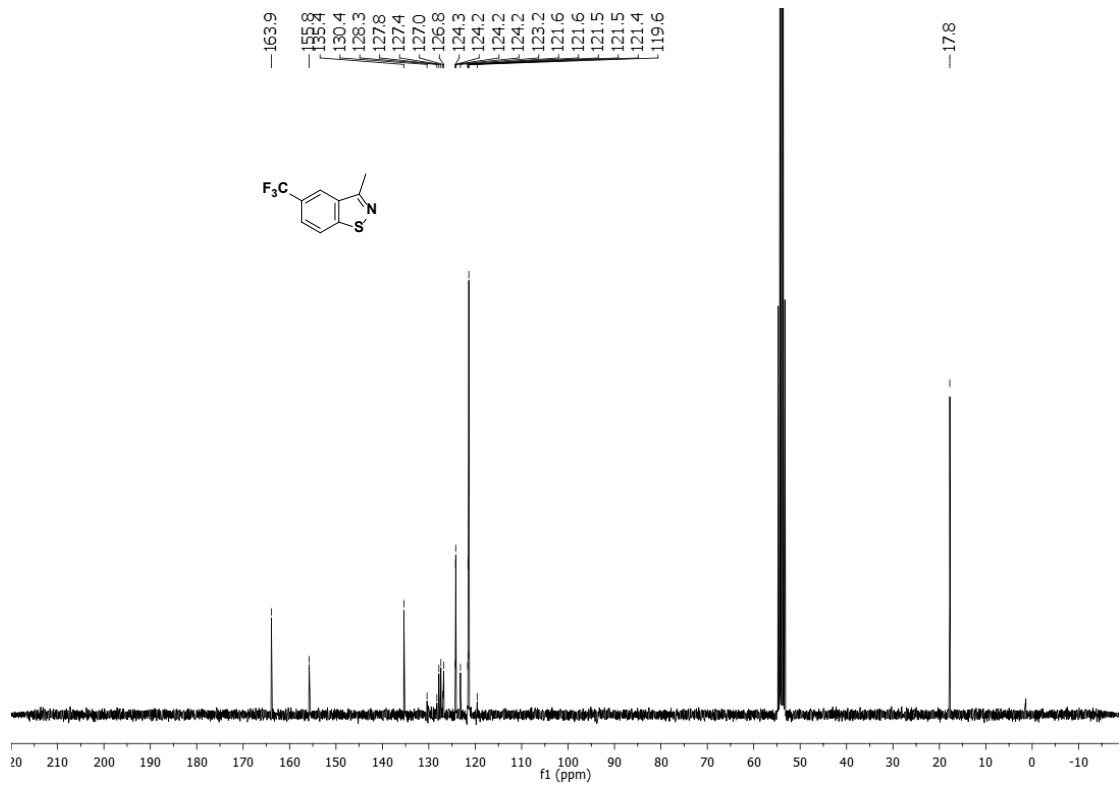

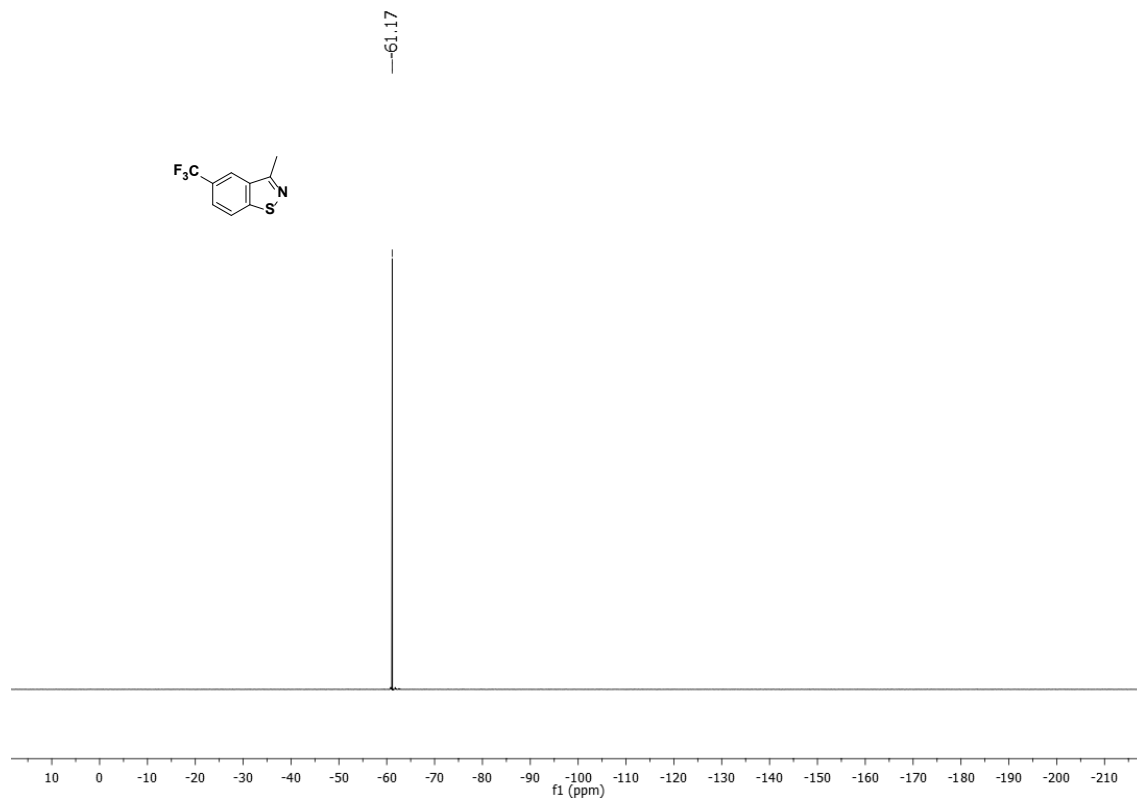



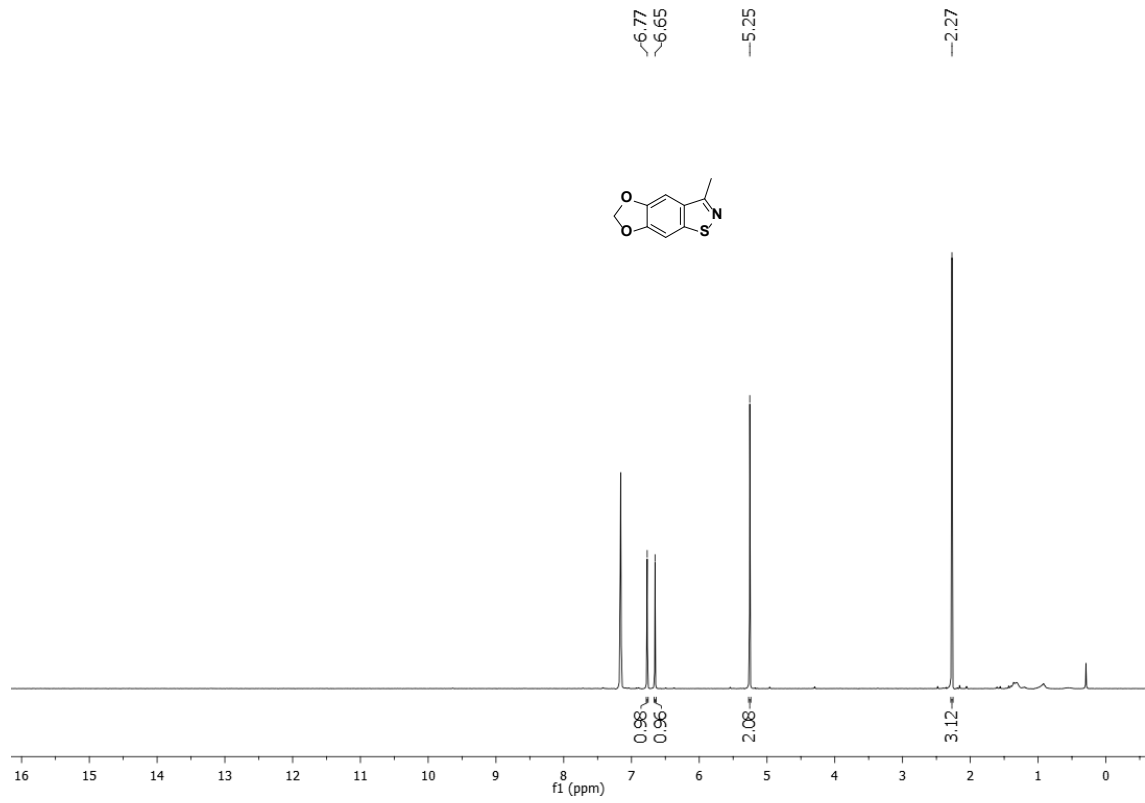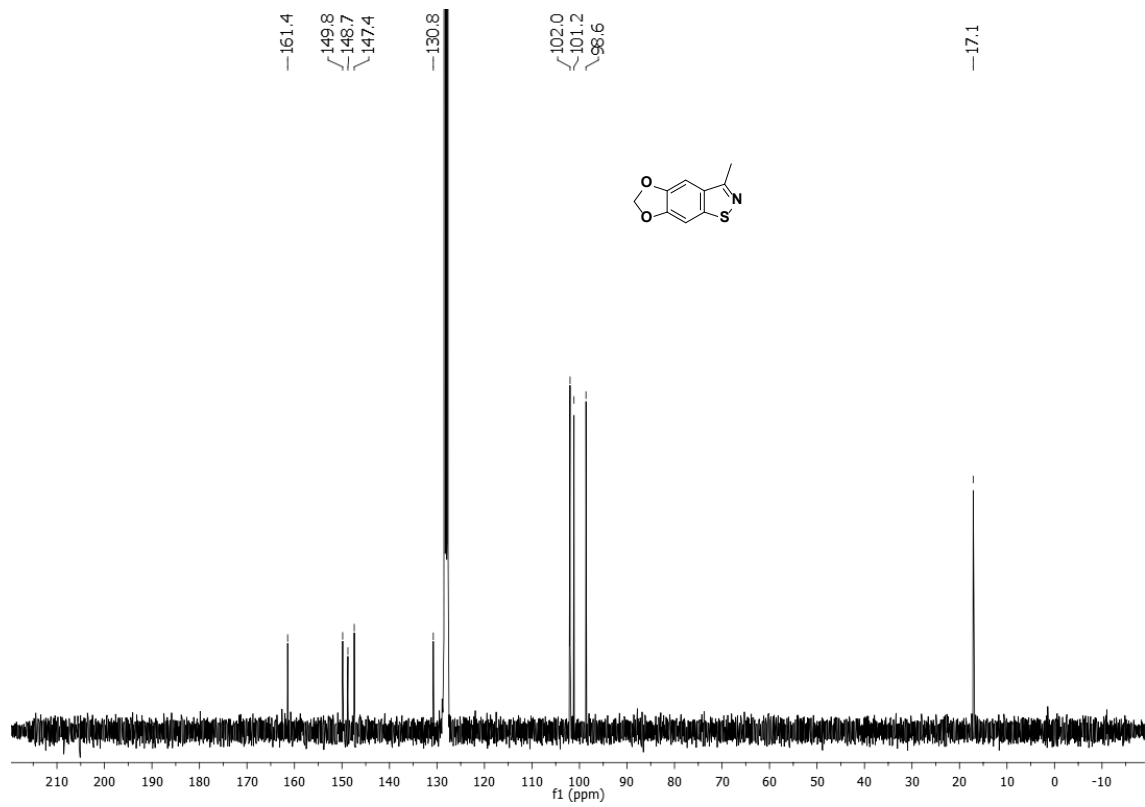

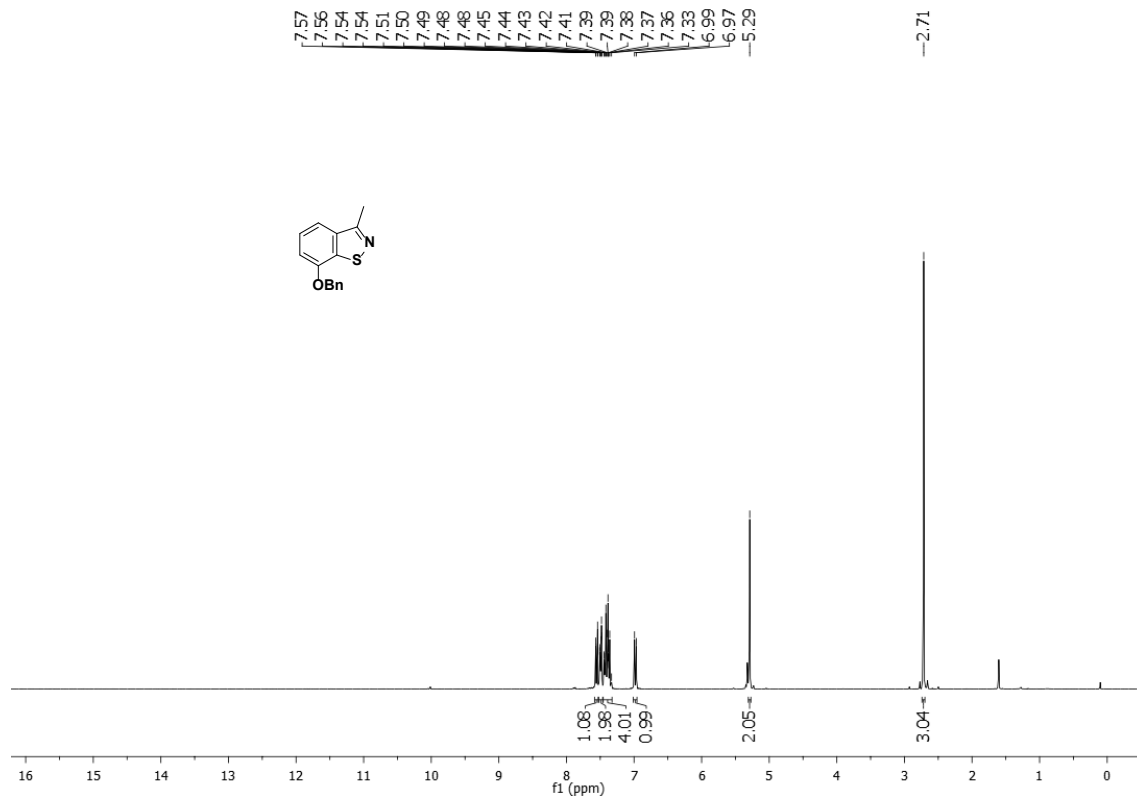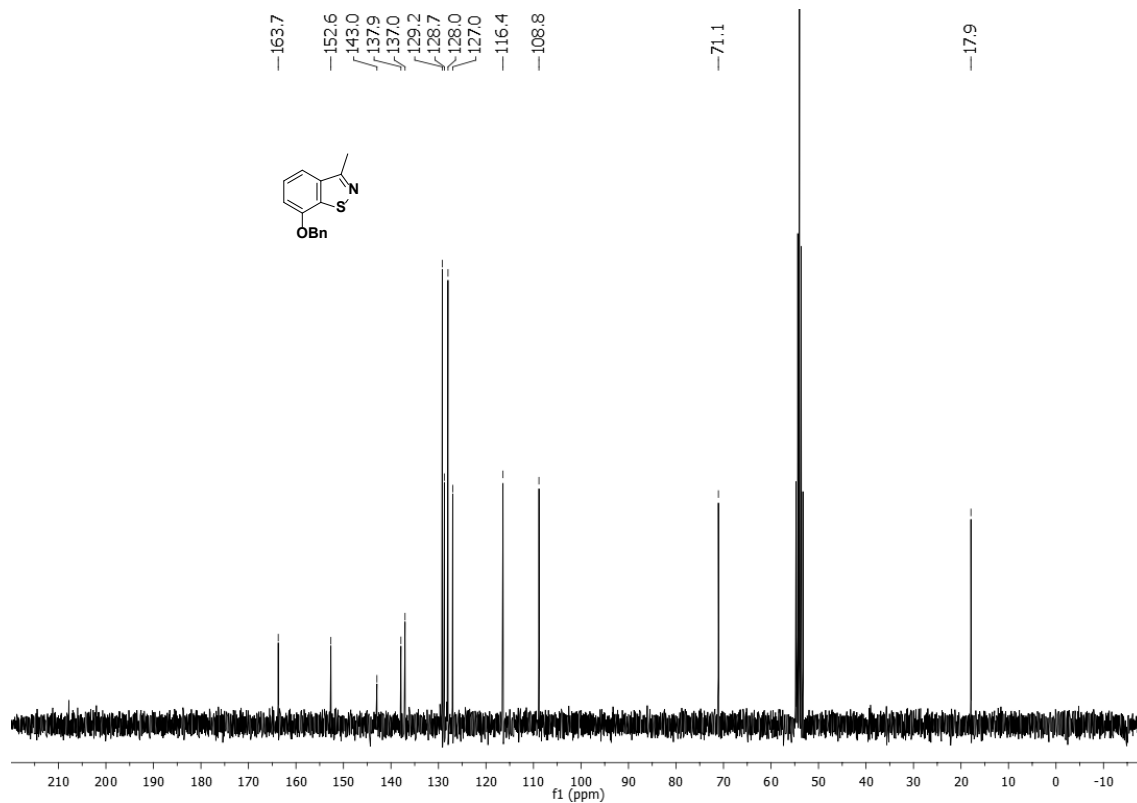

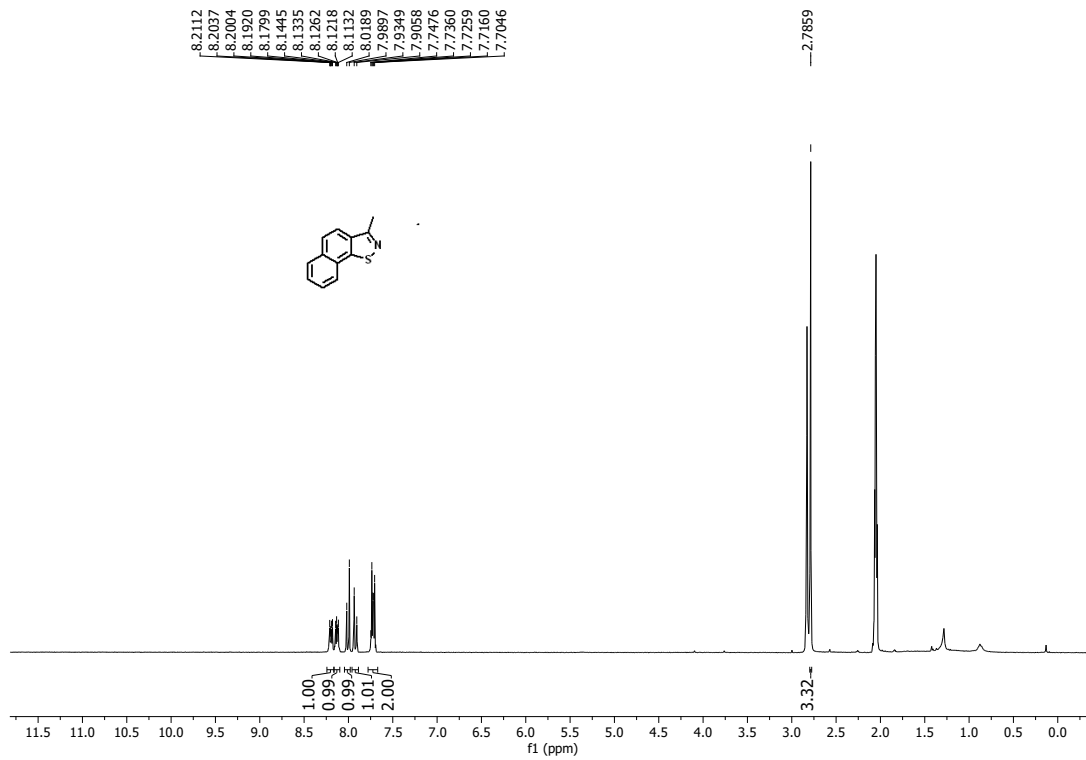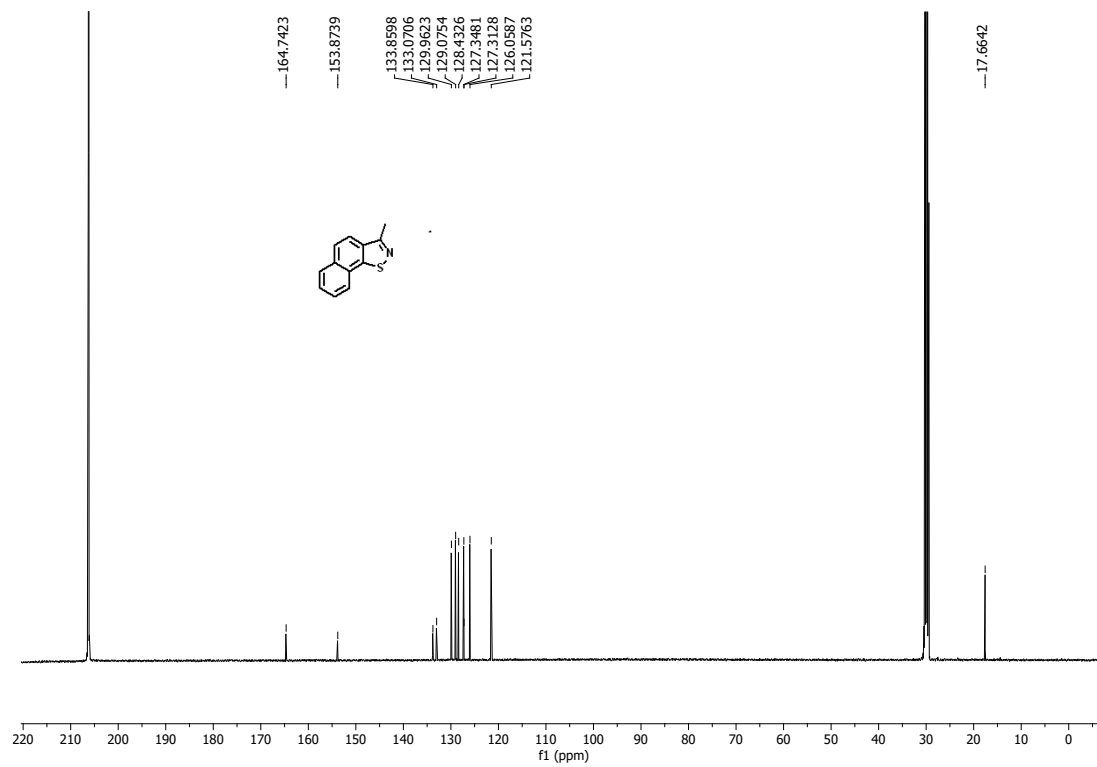

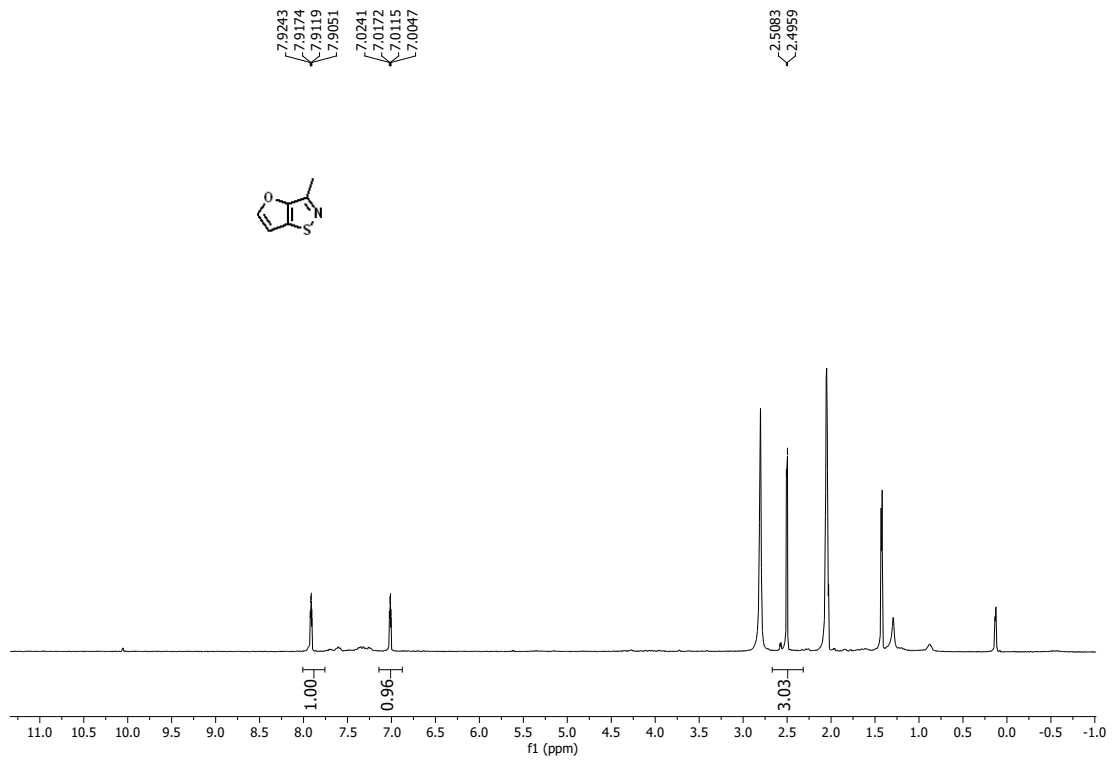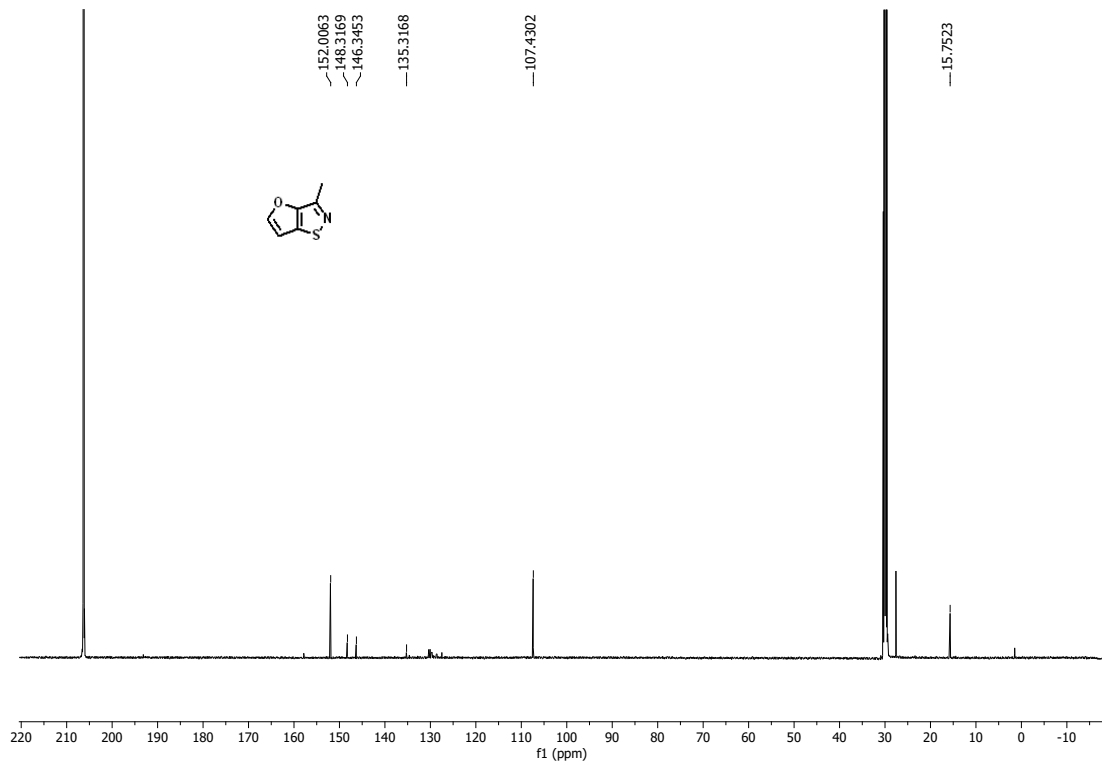

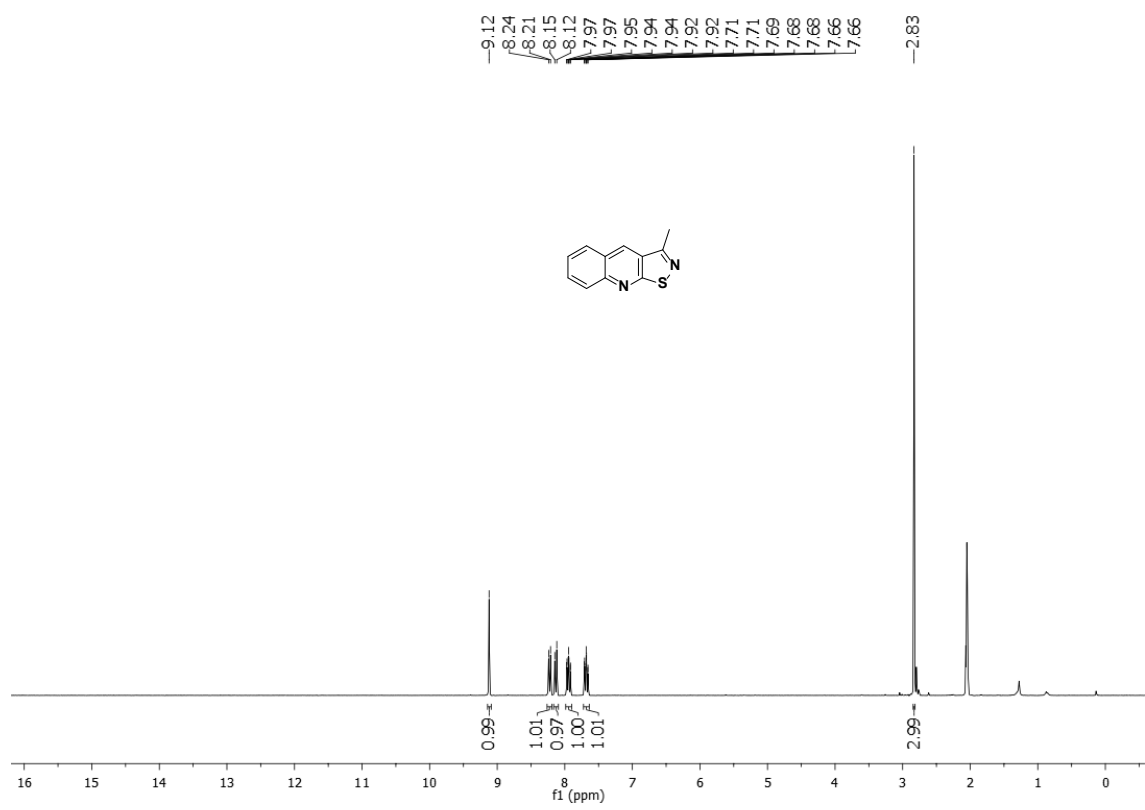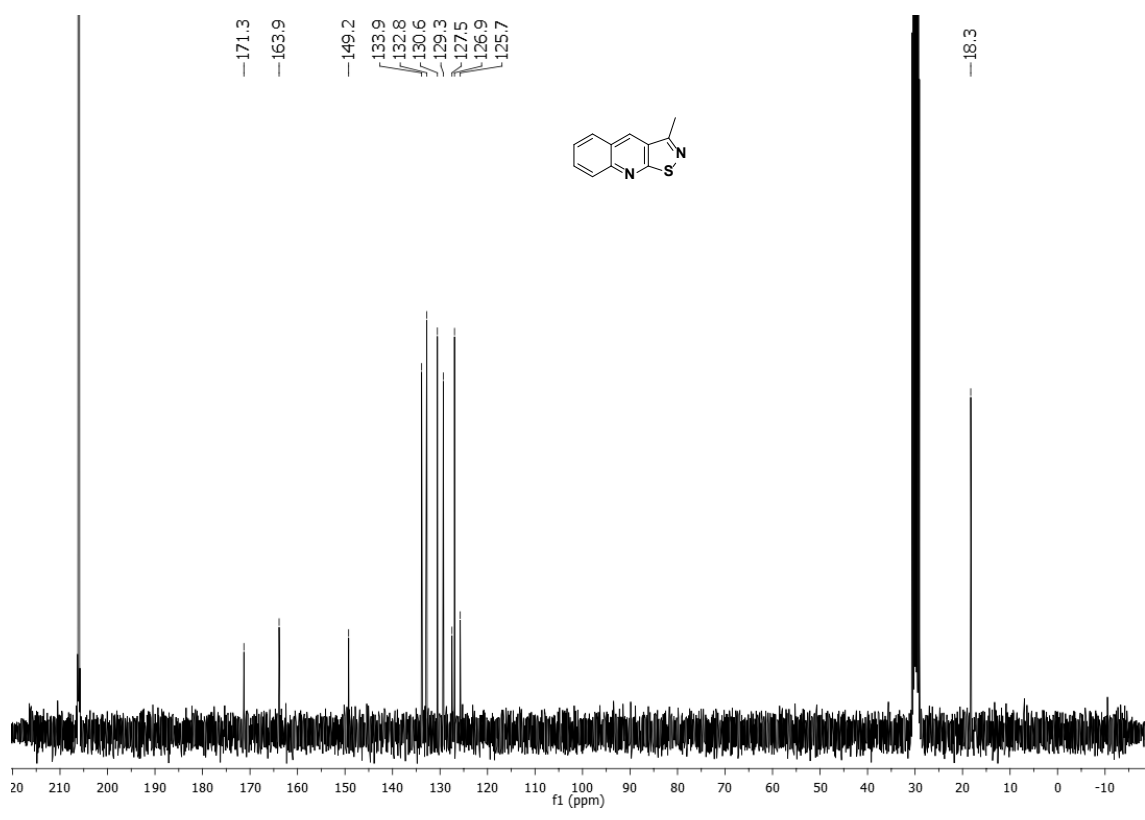

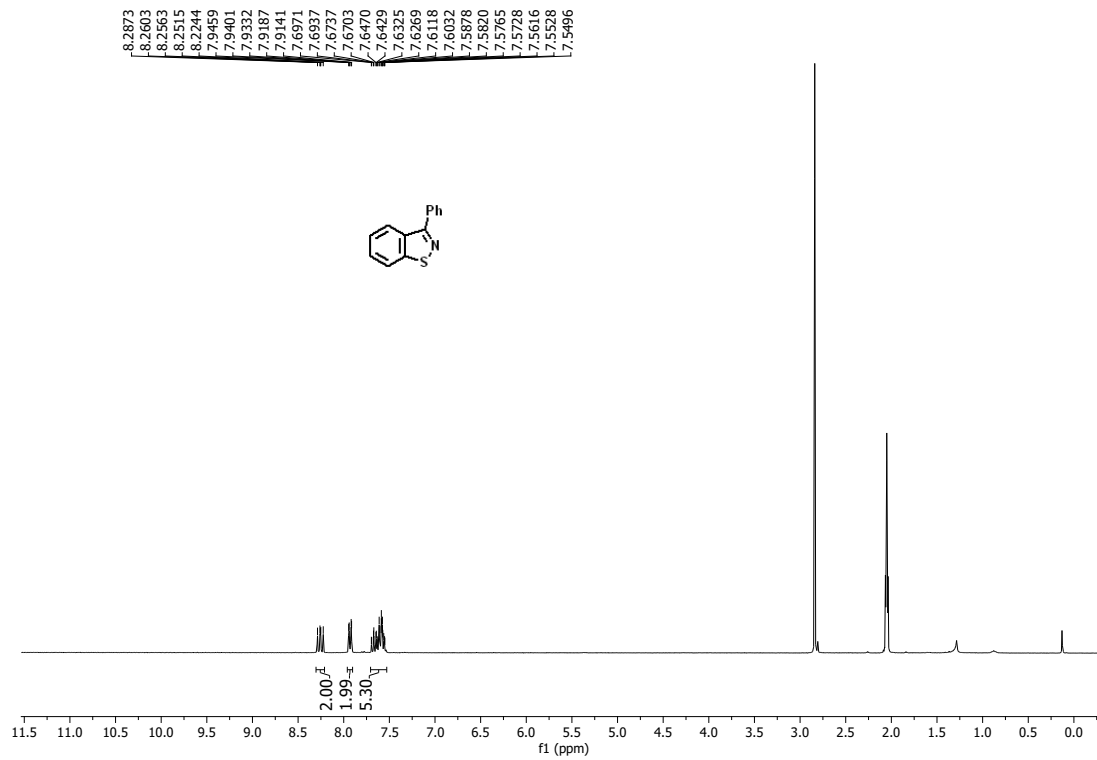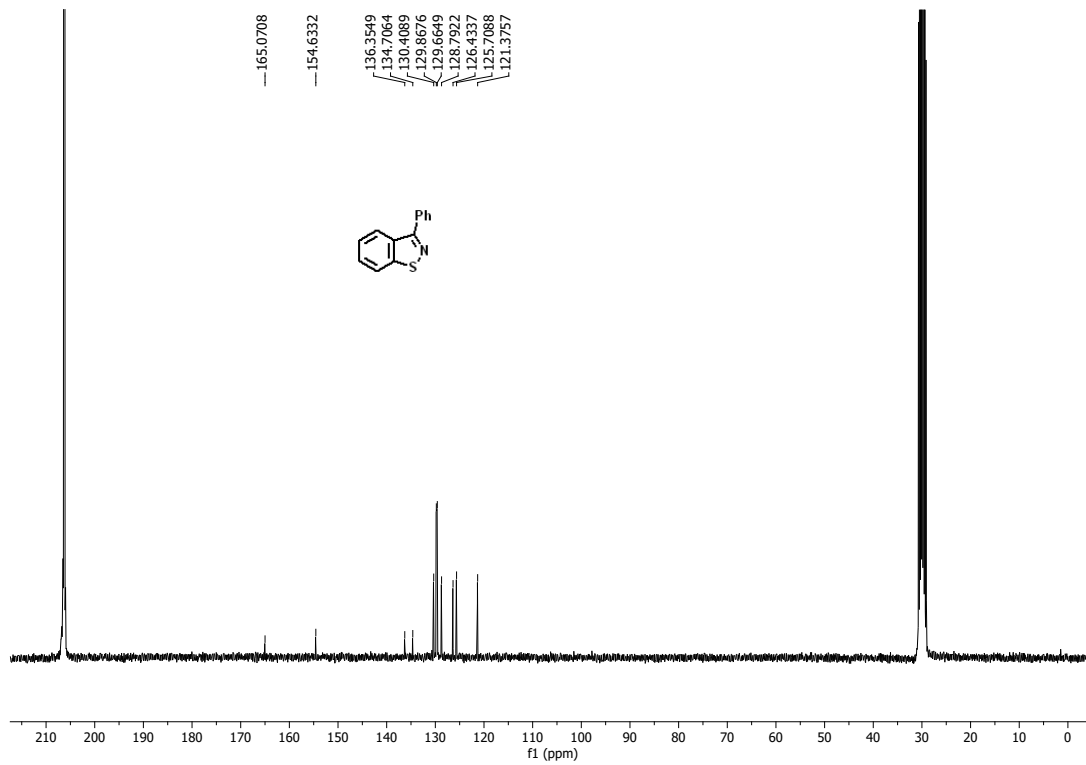

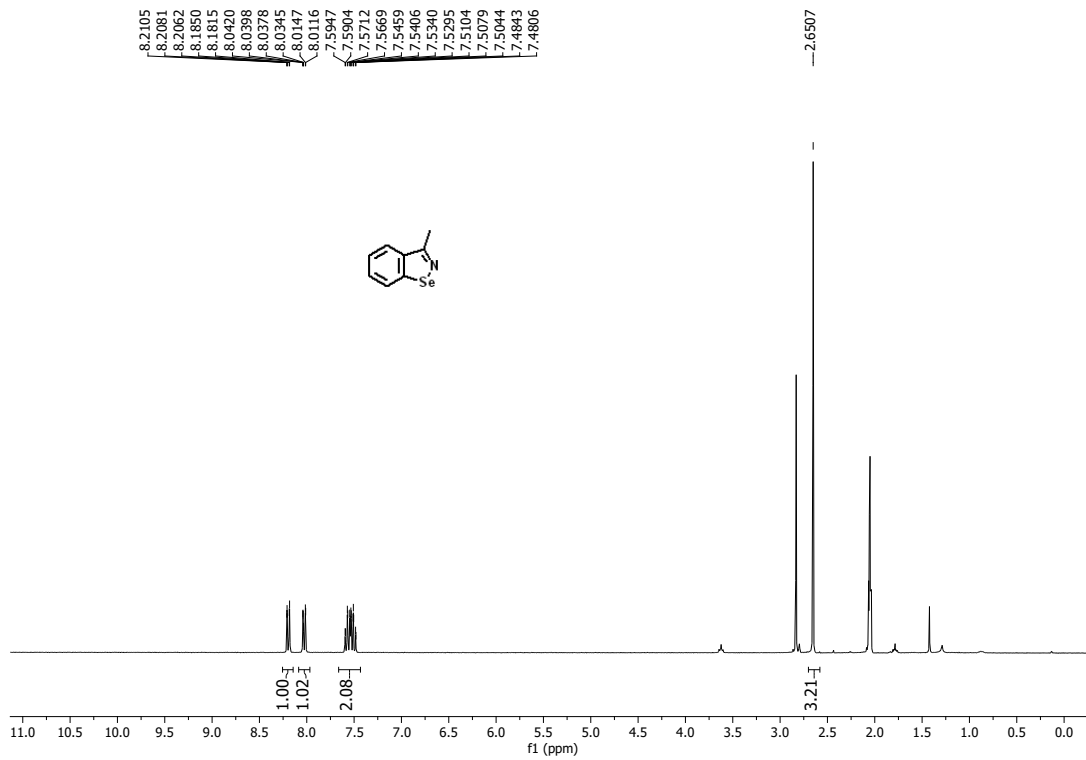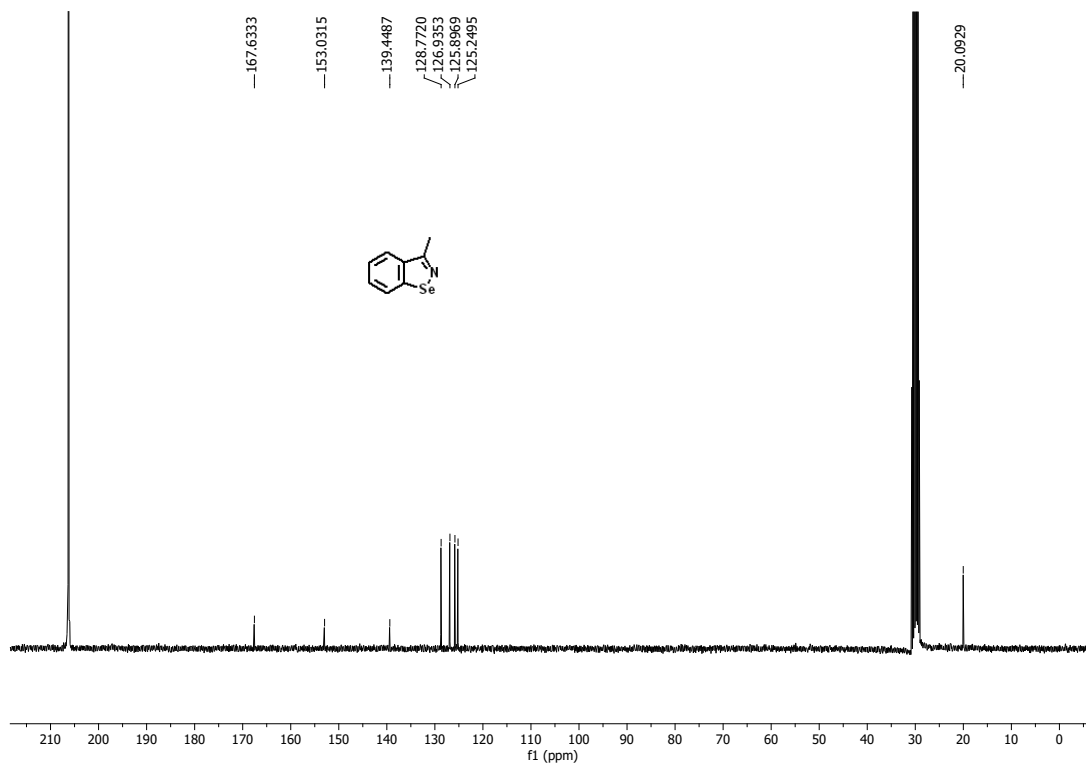

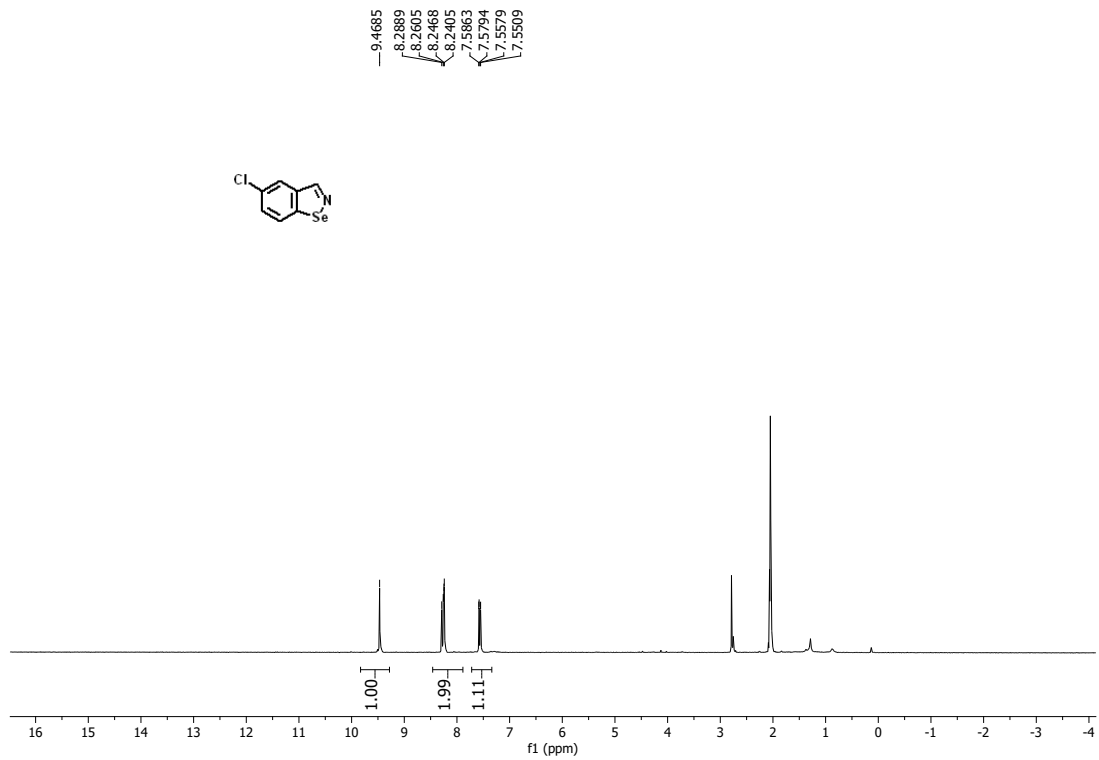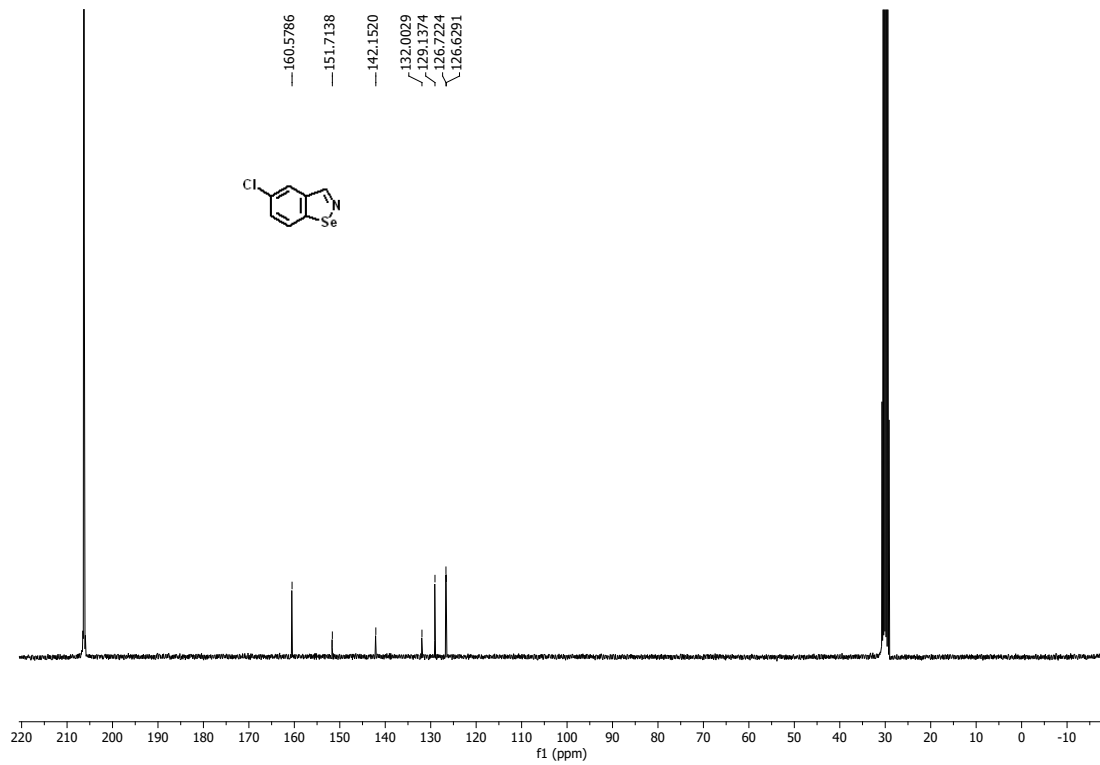



## 10.5. NMR Spectra of Brassilexin Derivative 4

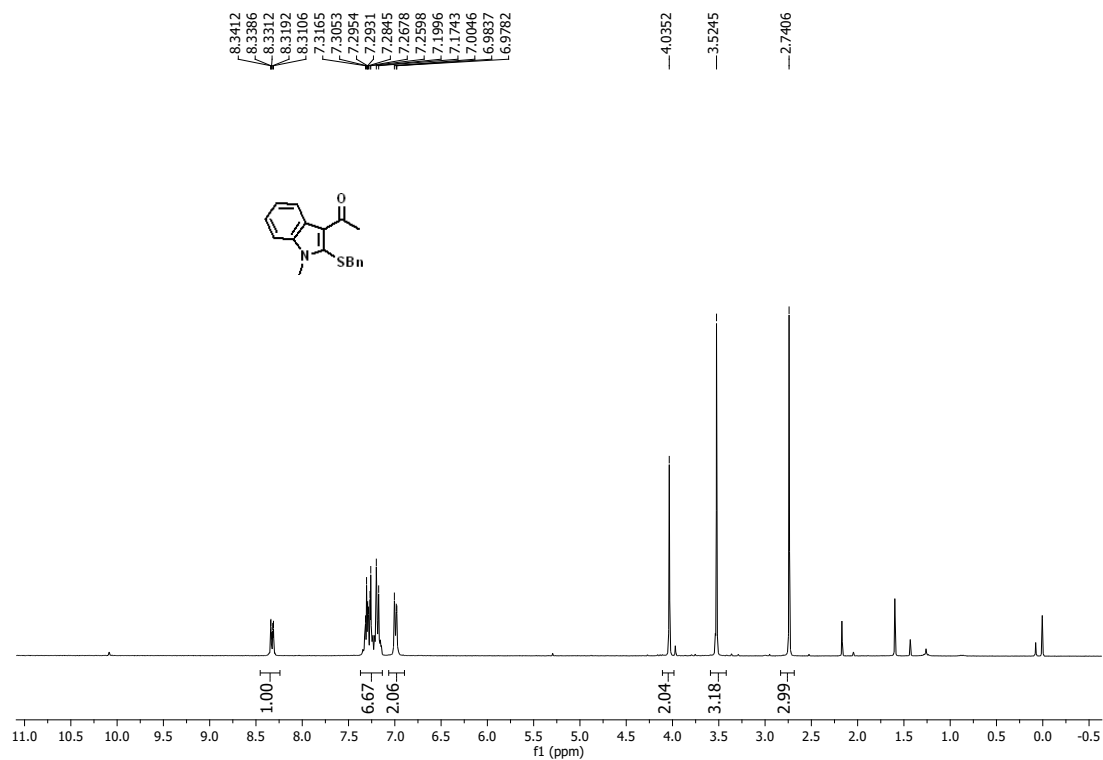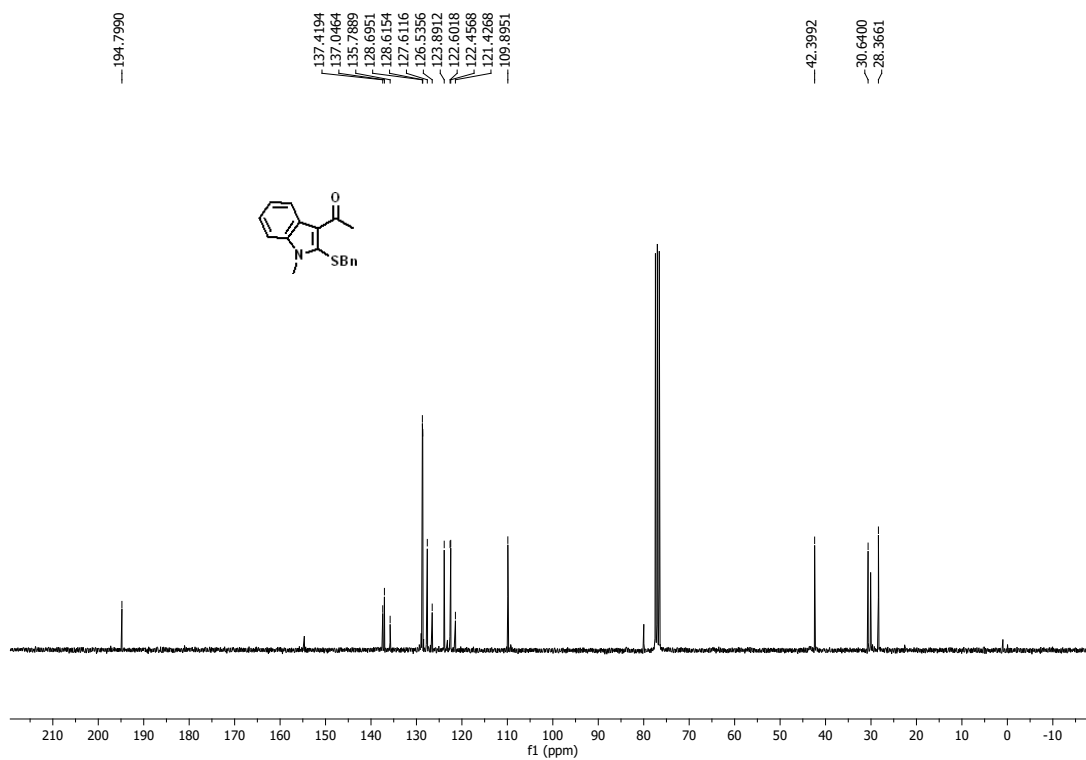

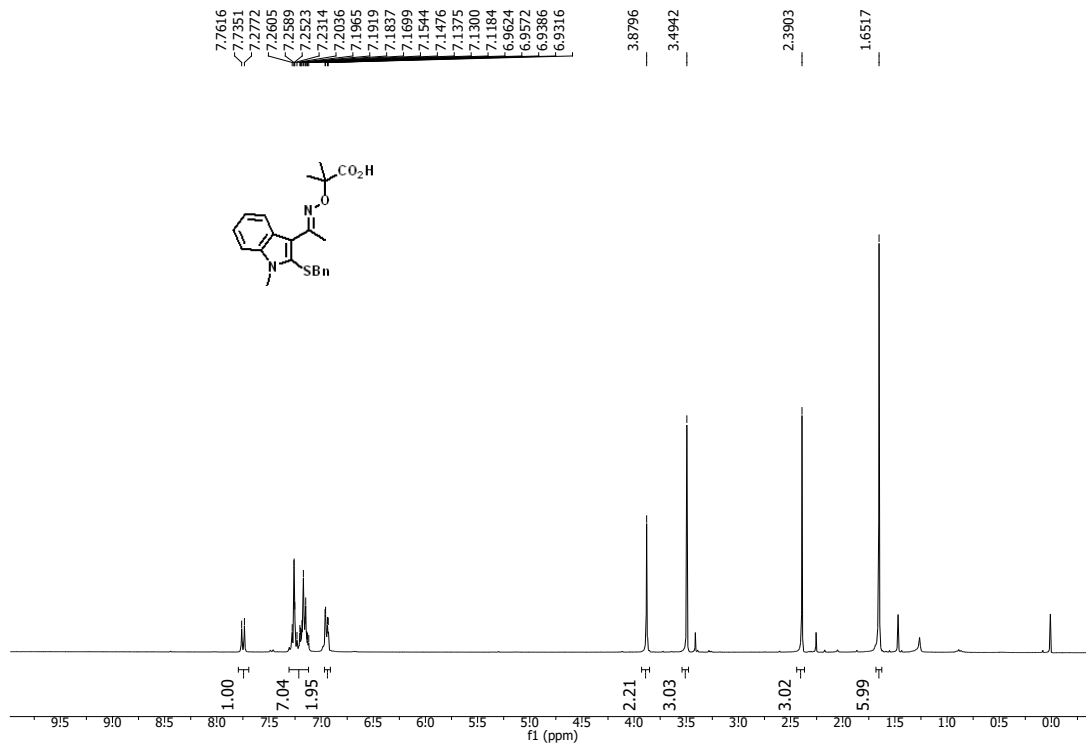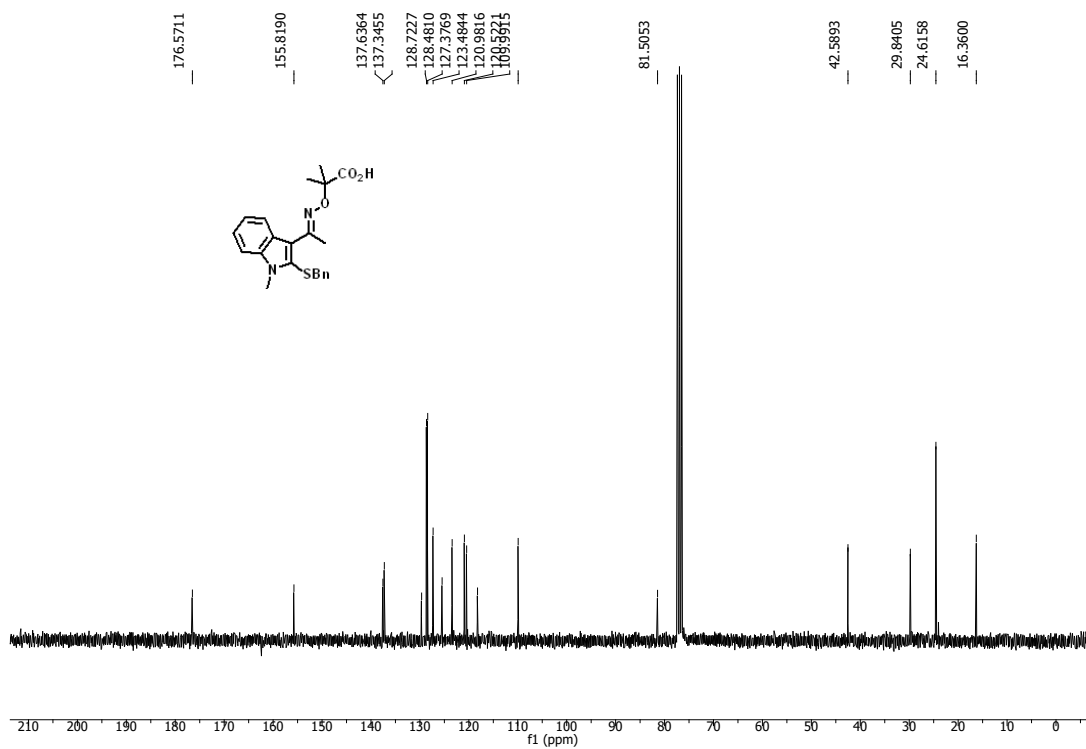

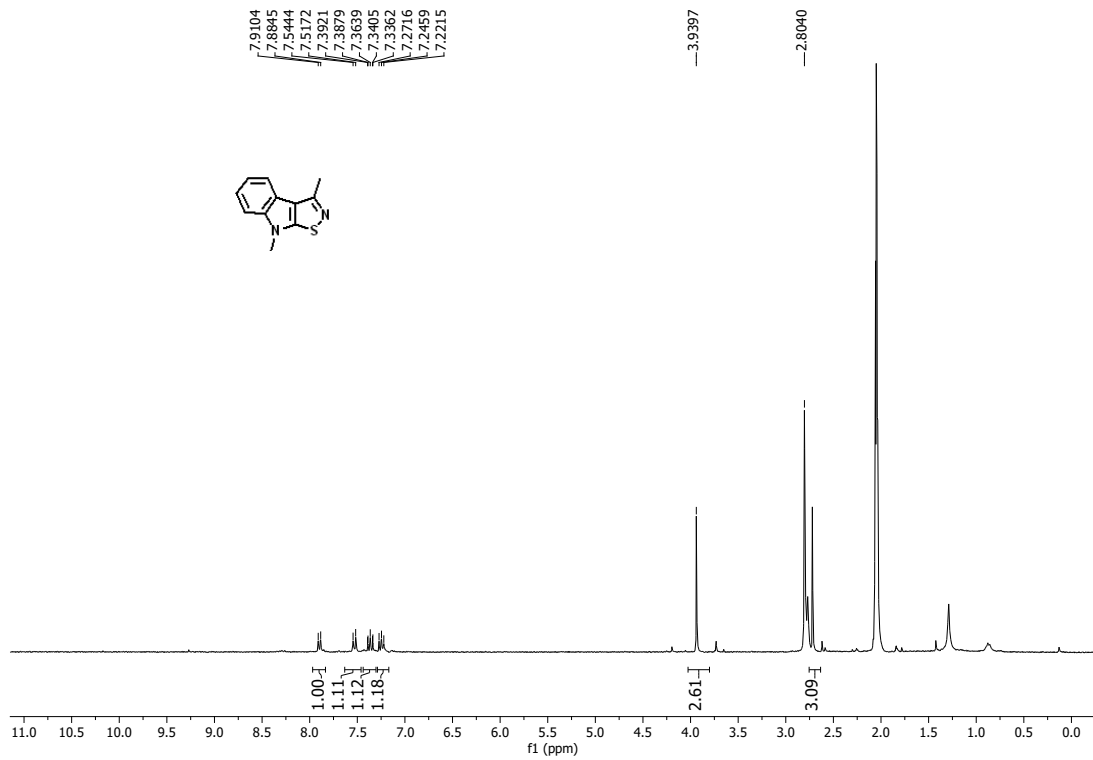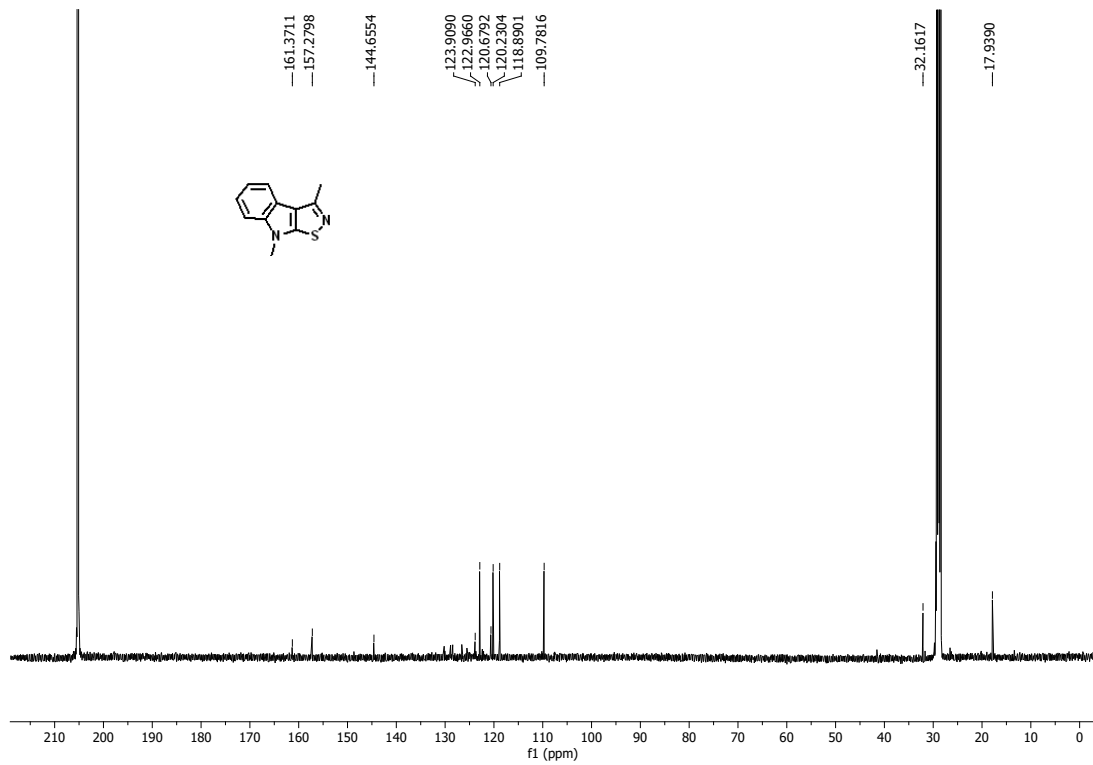

Supplement: d0gc02618b1.pdf [file d0gc02618b1.pdf]
